# Supplementary material for: A Systematic Review of miRNA and cfDNA as Potential Biomarkers for Liquid Biopsy in Myocarditis and Inflammatory Dilated Cardiomyopathy
Source: MDPI journal article supplement (doi:10.3390/biom12101476), 2022-10-13
Supplement: s1 [file Supplementary material S1.pdf › biomolecules-1931636-supplementary/Supplementary materials/Supplementary material S1.pdf]

## **Supplementary Material S1**

### **Search keys utilized in database searches**

#### **PubMed**

(myocarditis[Title] OR (dilated[Title] AND cardiomyopathy[Title]) OR dcm[Title]) AND (cfdna[Title] OR (circulating[Title] AND free[Title] AND dna[Title]) OR (cell[Title] AND free[Title] AND dna[Title]) OR mirna[Title] OR microRNA[Title] OR (micro[Title] AND rna[Title]))

#### **Scopus**

(myocarditis[Title] OR (dilated[Title] AND cardiomyopathy[Title]) OR dcm[Title]) AND (cfdna[Title] OR (circulating[Title] AND free[Title] AND dna[Title]) OR (cell[Title] AND free[Title] AND dna[Title]) OR mirna[Title] OR microRNA[Title] OR (micro[Title] AND rna[Title]))

#### **Web of science**

(myocarditis[Title] OR (dilated[Title] AND cardiomyopathy[Title]) OR dcm[Title]) AND (cfdna[Title] OR (circulating[Title] AND free[Title] AND dna[Title]) OR (cell[Title] AND free[Title] AND dna[Title]) OR mirna[Title] OR microRNA[Title] OR (micro[Title] AND rna[Title]))

#### **Embase**

(myocarditis[Title] OR (dilated[Title] AND cardiomyopathy[Title]) OR dcm[Title]) AND (cfdna[Title] OR (circulating[Title] AND free[Title] AND dna[Title]) OR (cell[Title] AND free[Title] AND dna[Title]) OR mirna[Title] OR microRNA[Title] OR (micro[Title] AND rna[Title]))
