# Supplementary material for: A Systematic Review of miRNA and cfDNA as Potential Biomarkers for Liquid Biopsy in Myocarditis and Inflammatory Dilated Cardiomyopathy
Source: MDPI journal article supplement (doi:10.3390/biom12101476), 2022-10-13
Supplement: s1 [file Table S1.xlsx]

## Sheet: Arkusz1
ID	Title	Authors	Publication Year	Consensus decision	Decision full text
1	A Novel Circulating MicroRNA for the Detection of Acute Myocarditis	Blanco-Domínguez R, Sánchez-Díaz R, de la Fuente H, Jiménez-Borreguero LJ, Matesanz-Marín A, Relaño M, Jiménez-Alejandre R, Linillos-Pradillo B, Tsilingiri K, Martín-Mariscal ML, Alonso-Herranz L, Moreno G, Martín-Asenjo R, García-Guimaraes MM, Bruno KA, Dauden E, González-Álvaro I, Villar-Guimerans LM, Martínez-León A, Salvador-Garicano AM, Michelhaugh SA, Ibrahim NE, Januzzi JL, Kottwitz J, Ili…	2021	PASS	PASS
2	Application of PD-1 Blockade in Cancer Immunotherapy	Wu X, Gu Z, Chen Y, Chen B, Chen W, Weng L, Liu X.	2019	Excluded
3	Emerging roles of exosomal miRNAs in diabetes mellitus	He X, Kuang G, Wu Y, Ou C.	2021	Excluded
4	Coxsackievirus B3 replication and pathogenesis	Garmaroudi FS, Marchant D, Hendry R, Luo H, Yang D, Ye X, Shi J, McManus BM.	2015	Excluded
5	Retraction		2021	Excluded
6	Circular RNA CircMAP3K5 Acts as a MicroRNA-22-3p Sponge to Promote Resolution of Intimal Hyperplasia Via TET2-Mediated Smooth Muscle Cell Differentiation	Zeng Z, Xia L, Fan S, Zheng J, Qin J, Fan X, Liu Y, Tao J, Liu Y, Li K, Ling Z, Bu Y, Martin KA, Hwa J, Liu R, Tang WH.	2021	Excluded
7	Regulation of the MIR155 host gene in physiological and pathological processes	Elton TS, Selemon H, Elton SM, Parinandi NL.	2013	Excluded
8	Non-invasive early detection of cancer four years before conventional diagnosis using a blood test	Chen X, Gole J, Gore A, He Q, Lu M, Min J, Yuan Z, Yang X, Jiang Y, Zhang T, Suo C, Li X, Cheng L, Zhang Z, Niu H, Li Z, Xie Z, Shi H, Zhang X, Fan M, Wang X, Yang Y, Dang J, McConnell C, Zhang J, Wang J, Yu S, Ye W, Gao Y, Zhang K, Liu R, Jin L.	2020	Excluded
9	Non-ischemic dilated cardiomyopathy and cardiac fibrosis	Cojan-Minzat BO, Zlibut A, Agoston-Coldea L.	2021	Excluded
10	Astragalus polysaccharide alleviates LPS-induced inflammation injury by regulating miR-127 in H9c2 cardiomyoblasts	Ren Q, Zhao S, Ren C, Ma Z.	2018	Excluded
11	Silencing long non-coding RNA Kcnq1ot1 alleviates pyroptosis and fibrosis in diabetic cardiomyopathy	Yang F, Qin Y, Lv J, Wang Y, Che H, Chen X, Jiang Y, Li A, Sun X, Yue E, Ren L, Li Y, Bai Y, Wang L.	2018	Excluded
12	Molecular Dysfunction and Phenotypic Derangement in Diabetic Cardiomyopathy	Evangelista I, Nuti R, Picchioni T, Dotta F, Palazzuoli A.	2019	Excluded
13	The Quest for New Approaches in Myocarditis and Inflammatory Cardiomyopathy	Heymans S, Eriksson U, Lehtonen J, Cooper LT Jr.	2016	Excluded
14	MiR-30c/PGC-1β protects against diabetic cardiomyopathy via PPARα	Yin Z, Zhao Y, He M, Li H, Fan J, Nie X, Yan M, Chen C, Wang DW.	2019	Excluded
15	Innate immune suppression by SARS-CoV-2 mRNA vaccinations: The role of G-quadruplexes, exosomes, and MicroRNAs	Seneff S, Nigh G, Kyriakopoulos AM, McCullough PA.	2022	Excluded
16	A microRNA program regulates the balance between cardiomyocyte hyperplasia and hypertrophy and stimulates cardiac regeneration	Raso A, Dirkx E, Sampaio-Pinto V, El Azzouzi H, Cubero RJ, Sorensen DW, Ottaviani L, Olieslagers S, Huibers MM, de Weger R, Siddiqi S, Moimas S, Torrini C, Zentillin L, Braga L, Nascimento DS, da Costa Martins PA, van Berlo JH, Zacchigna S, Giacca M, De Windt LJ.	2021	Excluded
17	LncRNA DCRF regulates cardiomyocyte autophagy by targeting miR-551b-5p in diabetic cardiomyopathy	Feng Y, Xu W, Zhang W, Wang W, Liu T, Zhou X.	2019	Excluded
18	LncRNA KCNQ1OT1 Mediates Pyroptosis in Diabetic Cardiomyopathy	Yang F, Qin Y, Wang Y, Li A, Lv J, Sun X, Che H, Han T, Meng S, Bai Y, Wang L.	2018	Excluded
19	MicroRNA-221/222 Family Counteracts Myocardial Fibrosis in Pressure Overload-Induced Heart Failure	Verjans R, Peters T, Beaumont FJ, van Leeuwen R, van Herwaarden T, Verhesen W, Munts C, Bijnen M, Henkens M, Diez J, de Windt LJ, van Nieuwenhoven FA, van Bilsen M, Goumans MJ, Heymans S, González A, Schroen B.	2018	PASS	Improper diagnosis
21	PD-1 inhibitor inducing exosomal miR-34a-5p expression mediates the cross talk between cardiomyocyte and macrophage in immune checkpoint inhibitor-related cardiac dysfunction	Xia W, Chen H, Chen D, Ye Y, Xie C, Hou M.	2020	Excluded
22	Circulating microRNA-29-5p can add to the discrimination between dilated cardiomyopathy and ischaemic heart disease	Brundin M, Wågsäter D, Alehagen U, Carlhäll CJ.	2021	PASS	PASS
23	miR-21 in Human Cardiomyopathies	Surina S, Fontanella RA, Scisciola L, Marfella R, Paolisso G, Barbieri M.	2021	Excluded
24	Pathogenesis of Diabetic Cardiomyopathy and Role of miRNA	Ahmed U, Khaliq S, Ahmad HU, Ahmad I, Ashfaq UA, Qasim M, Masoud MS.	2021	Excluded
26	Plasma microrna expression profile for reduced ejection fraction in dilated cardiomyopathy	Calderon-Dominguez M, Belmonte T, Quezada-Feijoo M, Ramos M, Calderon-Dominguez J, Campuzano O, Mangas A, Toro R.	2021	PASS	PASS
27	Serum circulating proteins from pediatric patients with dilated cardiomyopathy cause pathologic remodeling and cardiomyocyte stiffness	Jeffrey DA, Pires Da Silva J, Garcia AM, Jiang X, Karimpour-Fard A, Toni LS, Lanzicher T, Peña B, Miyano CA, Nunley K, Korst A, Sbaizero O, Taylor MR, Miyamoto SD, Stauffer BL, Sucharov CC.	2021	Excluded
28	Melatonin alleviates cardiac fibrosis via inhibiting lncRNA MALAT1/miR-141-mediated NLRP3 inflammasome and TGF-β1/Smads signaling in diabetic cardiomyopathy	Che H, Wang Y, Li H, Li Y, Sahil A, Lv J, Liu Y, Yang Z, Dong R, Xue H, Wang L.	2020	Excluded
29	Integrated Analysis of Hub Genes and miRNAs in Dilated Cardiomyopathy	Huang K, Wen S, Huang J, Wang F, Pang L, Wang Y, Sun X.	2020	PASS	Public dataset analysis
30	Dysregulation of circulating miRNAs promotes the pathogenesis of diabetes-induced cardiomyopathy	Ahmed U, Ashfaq UA, Qasim M, Ahmad I, Ahmad HU, Tariq M, Masoud MS, Khaliq S.	2021	Excluded
31	Value of circulating miRNA-21 in the diagnosis of subclinical diabetic cardiomyopathy	Tao L, Huang X, Xu M, Qin Z, Zhang F, Hua F, Jiang X, Wang Y.	2020	Excluded
32	Circulating miR-489 as a potential new biomarker for idiopathic dilated cardiomyopathy	Ishiguro T, Hayashi M, Fujiwara W, Okumura S, Yoshinaga M, Yamada R, Ueda S, Ito T, Niwa Y, Miyazaki A, Harada M, Naruse H, Ishii J, Ozaki Y, Izawa H.	2021	PASS	PASS
33	Circulating microRNA signature for the diagnosis of childhood dilated cardiomyopathy	Jiao M, You HZ, Yang XY, Yuan H, Li YL, Liu WX, Jin M, Du J.	2018	PASS	PASS
34	Pathophysiological Fundamentals of Diabetic Cardiomyopathy	Hu X, Bai T, Xu Z, Liu Q, Zheng Y, Cai L.	2017	Excluded
35	Involvement of circHIPK3 in the pathogenesis of diabetic cardiomyopathy in mice	Wang W, Zhang S, Xu L, Feng Y, Wu X, Zhang M, Yu Z, Zhou X.	2021	Excluded
36	MicroRNAs in Hypertrophic, Arrhythmogenic and Dilated Cardiomyopathy	Chiti E, Paolo MD, Turillazzi E, Rocchi A.	2021	Excluded
37	Genomic analysis of circular RNAs in heart	Dong K, He X, Su H, Fulton DJR, Zhou J.	2020	Excluded
38	Emerging role of microRNAs in dilated cardiomyopathy: evidence regarding etiology	Calderon-Dominguez M, Belmonte T, Quezada-Feijoo M, Ramos-Sánchez M, Fernández-Armenta J, Pérez-Navarro A, Cesar S, Peña-Peña L, Vea À, Llorente-Cortés V, Mangas A, de Gonzalo-Calvo D, Toro R.	2020	Excluded
39	Dysregulated CD4+ T Cells and microRNAs in Myocarditis	Wang J, Han B.	2020	Excluded
40	Role of microRNA in diabetic cardiomyopathy: From mechanism to intervention	Guo R, Nair S.	2017	Excluded
41	Current Use of Cardiac Biomarkers in Various Heart Conditions	Khan S, Rasool ST.	2021	Excluded
42	Integrated regulatory network based on lncRNA-miRNA-mRNA-TF reveals key genes and sub-networks associated with dilated cardiomyopathy	Charles S, Natarajan J.	2021	PASS	Public dataset analysis
43	Mechanisms and management of prothrombotic state in COVID-19 disease	Acherjee T, Behara A, Saad M, Vittorio TJ.	2021	Excluded
44	Upregulated Angiogenesis Is Incompetent to Rescue Dilated Cardiomyopathy Phenotype in Mice	Arif M, Alam P, Ahmed RP, Pandey R, Faridi HM, Sadayappan S.	2021	Excluded
45	Identification and analysis of circulating long non-coding RNAs with high significance in diabetic cardiomyopathy	Pant T, Dhanasekaran A, Zhao M, Thorp EB, Forbess JM, Bosnjak ZJ, Benjamin IJ, Ge ZD.	2021	Excluded
46	Regenerative Medicine and Biomarkers for Dilated Cardiomyopathy	Lesizza P, Aleksova A, Ortis B, Beltrami AP, Giacca M, Sinagra G.	2019	Excluded
47	MicroRNA and cardiac pathologies	Latronico MV, Catalucci D, Condorelli G.	2008	Excluded
48	MicroRNAs as Biomarkers in Hypertrophic Cardiomyopathy: Current State of the Art	Angelopoulos A, Oikonomou E, Vogiatzi G, Antonopoulos A, Tsalamandris S, Georgakopoulos C, Papanikolaou P, Lazaros G, Charalambous G, Siasos G, Vlachopoulos C, Tousoulis D.	2021	Excluded
49	Circulating microRNAs as novel biomarkers for dilated cardiomyopathy	Wang H, Chen F, Tong J, Li Y, Cai J, Wang Y, Li P, Hao Y, Tian W, Lv Y, Chong J, Yang J.	2017	PASS	PASS
50	MicroRNA-425-3p inhibits myocardial inflammation and cardiomyocyte apoptosis in mice with viral myocarditis through targeting TGF-β1	Li J, Tu J, Gao H, Tang L.	2021	Excluded
51	Peripheral microRNA panels to guide the diagnosis of familial cardiomyopathy	Belmonte T, Mangas A, Calderon-Dominguez M, Quezada-Feijoo M, Ramos M, Campuzano O, Gomez S, Peña ML, Cubillos-Arango AM, Dominguez F, Llorente-Cortés V, de Gonzalo-Calvo D, Toro R.	2020	Excluded
52	Deletion of Smad3 protects against diabetic myocardiopathy in db/db mice	Dong L, Li JC, Hu ZJ, Huang XR, Wang L, Wang HL, Ma RCW, Lan HY, Yang SJ.	2021	Excluded
53	Extracellular Vesicles as Protagonists of Diabetic Cardiovascular Pathology	Gustafson D, Veitch S, Fish JE.	2017	Excluded
54	Time-ordered dysregulated ceRNA networks reveal disease progression and diagnostic biomarkers in ischemic and dilated cardiomyopathy	Bai Z, Sun H, Li X, Wu J, Yuan H, Zhang G, Yang H, Shi H.	2021	Excluded
55	GAS5 regulates diabetic cardiomyopathy via miR‑221‑3p/p27 axis‑associated autophagy	Chen D, Zhang M.	2021	Excluded
56	Molecular mechanism of diabetic cardiomyopathy and modulation of microRNA function by synthetic oligonucleotides	Ghosh N, Katare R.	2018	Excluded
57	Role of Non-coding RNA in Diabetic Cardiomyopathy	Xia L, Song M.	2020	Excluded
58	Relations between circulating and myocardial fibrosis-linked microRNAs with left ventricular reverse remodeling in dilated cardiomyopathy	Dziewięcka E, Totoń-Żurańska J, Wołkow P, Kołton-Wróż M, Pitera E, Wiśniowska-Śmiałek S, Khachatryan L, Karabinowska A, Szymonowicz M, Podolec P, Rubiś P.	2020	PASS
59	Noncoding RNAs: potential regulators in cardioncology	Chatterjee S, Gupta SK, Bär C, Thum T.	2019	Excluded
60	Circulating miR-216a as a biomarker of metabolic alterations and obesity in women	Vonhögen IGC, Mohseni Z, Winkens B, Xiao K, Thum T, Calore M, da Costa Martins PA, de Windt LJ, Spaanderman MEA, Ghossein-Doha C.	2020	Excluded
61	Analysis of changes in circular RNA expression and construction of ceRNA networks in human dilated cardiomyopathy	Lin Z, Zhao Y, Dai F, Su E, Li F, Yan Y.	2021	Excluded
62	Effects of Nano-α-Linolenic Acid and miR-146 on Mice with Viral Myocarditis	Li L, Zhong M, Zuo Q, Ma W, Jiang Z, Xiao J.	2021	Excluded
63	The role of microRNAs in enteroviral infections	Wu J, Shen L, Chen J, Xu H, Mao L.	2015	Excluded
64	Diabetic Cardiomyopathy: Current Approach and Potential Diagnostic and Therapeutic Targets	Gilca GE, Stefanescu G, Badulescu O, Tanase DM, Bararu I, Ciocoiu M.	2017	Excluded
65	Long-chain noncoding RNA-GAS5/hsa-miR-138-5p attenuates high glucose-induced cardiomyocyte damage by targeting CYP11B2	Zhuo X, Bai K, Wang Y, Liu P, Xi W, She J, Liu J.	2021	Excluded
66	Integrated analysis of mRNA and microRNA expression profiles reveals differential transcriptome signature in ischaemic and dilated cardiomyopathy induced heart failure	Shao X, Zhang X, Yang L, Zhang R, Zhu R, Feng R.	2021	PASS	Public dataset analysis
67	MicroRNAs: A Critical Regulator and a Promising Therapeutic and Diagnostic Molecule for Diabetic Cardiomyopathy	Mathur P, Rani V.	2021	Excluded
68	MicroRNA-324-3p Plays A Protective Role Against Coxsackievirus B3-Induced Viral Myocarditis	Liu T, Tong J, Shao C, Qu J, Wang H, Shi Y, Lin Y, Liu Y, Shao S, Shen H.	2021	PASS	Animal study
69	Diabetic Cardiomyopathy: An Immunometabolic Perspective	Mishra PK, Ying W, Nandi SS, Bandyopadhyay GK, Patel KK, Mahata SK.	2017	Excluded
70	[Expression and Significance of Circulating microRNA-29b in Adult Fulminant Myocarditis]	Chen JH, He J, Zhou R, Zheng N.	2022	PASS	PASS
71	miR-34a attenuates myocardial fibrosis in diabetic cardiomyopathy mice via targeting Pin-1	Zhang XL, Zhang G, Bai ZH.	2021	Excluded
72	Circulating microRNA as a biomarker for recovery in pediatric dilated cardiomyopathy	Miyamoto SD, Karimpour-Fard A, Peterson V, Auerbach SR, Stenmark KR, Stauffer BL, Sucharov CC.	2015	PASS	No control group
73	Identification of Circular RNA-MicroRNA-Messenger RNA Regulatory Network in Atrial Fibrillation by Integrated Analysis	Liu T, Zhang G, Wang Y, Rao M, Zhang Y, Guo A, Wang M.	2020	Excluded
74	miRNA-548c: a specific signature in circulating PBMCs from dilated cardiomyopathy patients	Gupta MK, Halley C, Duan ZH, Lappe J, Viterna J, Jana S, Augoff K, Mohan ML, Vasudevan NT, Na J, Sossey-Alaoui K, Liu X, Liu CG, Tang WH, Naga Prasad SV.	2013	Excluded
75	Preclinical evaluation of PEGylated liposomal doxorubicin as an effective radiosensitizer in chemoradiotherapy for lung cancer	Chen JL, Pan CK, Lin YL, Tsai CY, Huang YS, Yang WC, Hsu FM, Kuo SH, Shieh MJ.	2021	Excluded
76	MicroRNA profiling as a novel diagnostic tool for identification of patients with inflammatory and/or virally induced cardiomyopathies	Aleshcheva G, Pietsch H, Escher F, Schultheiss HP.	2021	PASS	PASS
77	The Role of ERK1/2 in the Development of Diabetic Cardiomyopathy	Xu Z, Sun J, Tong Q, Lin Q, Qian L, Park Y, Zheng Y.	2016	Excluded
78	The microRNA in ventricular remodeling: the miR-30 family	Zhang X, Dong S, Jia Q, Zhang A, Li Y, Zhu Y, Lv S, Zhang J.	2019	Excluded
79	MicroRNA-223-3p modulates dendritic cell function and ameliorates experimental autoimmune myocarditis by targeting the NLRP3 inflammasome	Chen L, Hou X, Zhang M, Zheng Y, Zheng X, Yang Q, Li J, Gu N, Zhang M, Sun Y, Wu J, Yu B.	2020	Excluded
80	Emerging Actors in Diabetic Cardiomyopathy: Heartbreaker Biomarkers or Therapeutic Targets?	Palomer X, Pizarro-Delgado J, Vázquez-Carrera M.	2018	Excluded
81	Dihydromyricetin Prevents Diabetic Cardiomyopathy via miR-34a Suppression by Activating Autophagy	Ni T, Lin N, Lu W, Sun Z, Lin H, Chi J, Guo H.	2020	Excluded
82	Plasma microRNA profiling of children with idiopathic dilated cardiomyopathy	Enes Coşkun M, Kervancıoğlu M, Öztuzcu S, Yılmaz Coşkun F, Ergün S, Başpınar O, Kılınç M, Temel L, Coşkun MY.	2016	PASS	PASS
83	Reconstruction and Analysis of the lncRNA-miRNA-mRNA Network Based on Competitive Endogenous RNA Reveal Functional lncRNAs in Dilated Cardiomyopathy	Tao L, Yang L, Huang X, Hua F, Yang X.	2019	PASS	No patient characteristics
84	Cardiosphere-derived exosomal microRNAs for myocardial repair in pediatric dilated cardiomyopathy	Hirai K, Ousaka D, Fukushima Y, Kondo M, Eitoku T, Shigemitsu Y, Hara M, Baba K, Iwasaki T, Kasahara S, Ohtsuki S, Oh H.	2020	Excluded
85	Long noncoding RNA PVT1 facilitates high glucose-induced cardiomyocyte death through the miR-23a-3p/CASP10 axis	Yu FR, Xia YW, Wang SB, Xiao LH.	2021	Excluded
86	MicroRNA-181b Serves as a Circulating Biomarker and Regulates Inflammation in Heart Failure	Yang H, Shan L, Gao Y, Li L, Xu G, Wang B, Yin X, Gao C, Liu J, Yang W.	2021	PASS	PASS
87	Consensus on biomarkers for neuroendocrine tumour disease	Oberg K, Modlin IM, De Herder W, Pavel M, Klimstra D, Frilling A, Metz DC, Heaney A, Kwekkeboom D, Strosberg J, Meyer T, Moss SF, Washington K, Wolin E, Liu E, Goldenring J.	2015	Excluded
88	Treatment of dilated cardiomyopathy in a mouse model of Friedreich's ataxia using N-acetylcysteine and identification of alterations in microRNA expression that could be involved in its pathogenesis	Chiang S, Huang MLH, Richardson DR.	2020	Excluded
89	Analysis of Selected Cardiovascular Biomarkers in Takotsubo Cardiomyopathy and the Most Frequent Cardiomyopathies	Topf A, Mirna M, Bacher N, Paar V, Motloch LJ, Ohnewein B, Larbig R, Grueninger J, Hoppe UC, Lichtenauer M, Pistulli R.	2021	Excluded
90	MicroRNA‑21 regulation of the progression of viral myocarditis to dilated cardiomyopathy	Xu HF, Ding YJ, Zhang ZX, Wang ZF, Luo CL, Li BX, Shen YW, Tao LY, Zhao ZQ.	2014	Excluded
91	Pathological Effects of Exosomes in Mediating Diabetic Cardiomyopathy	Salem ESB, Fan GC.	2017	Excluded
92	Macrophages: First guards in the prevention of cardiovascular diseases	Nasser MI, Zhu S, Huang H, Zhao M, Wang B, Ping H, Geng Q, Zhu P.	2020	Excluded
93	The Role of Non-coding RNAs in Viral Myocarditis	Zhang C, Xiong Y, Zeng L, Peng Z, Liu Z, Zhan H, Yang Z.	2020	Excluded
94	Etiology of cardiovascular disease in patients with schizophrenia: current perspectives	Emul M, Kalelioglu T.	2015	Excluded
95	Heart failure: advanced development in genetics and epigenetics	Yang J, Xu WW, Hu SJ.	2015	Excluded
96	Circulating MicroRNA-208b and MicroRNA-499 reflect myocardial damage in cardiovascular disease	Corsten MF, Dennert R, Jochems S, Kuznetsova T, Devaux Y, Hofstra L, Wagner DR, Staessen JA, Heymans S, Schroen B.	2010	PASS	PASS
98	Epigenetic-sensitive liquid biomarkers and personalised therapy in advanced heart failure: a focus on cell-free DNA and microRNAs	Mansueto G, Benincasa G, Della Mura N, Nicoletti GF, Napoli C.	2020	Excluded
99	Long Noncoding RNA OIP5-AS1 Overexpression Promotes Viability and Inhibits High Glucose-Induced Oxidative Stress of Cardiomyocytes by Targeting MicroRNA-34a/SIRT1 Axis in Diabetic Cardiomyopathy	Sun H, Wang C, Zhou Y, Cheng X.	2021	Excluded
100	Circular RNAs in the cardiovascular system	Gomes CPC, Salgado-Somoza A, Creemers EE, Dieterich C, Lustrek M, Devaux Y; Cardiolinc™ network.	2018	Excluded
101	A New Era of Cardiac Cell Therapy: Opportunities and Challenges	Huang K, Hu S, Cheng K.	2019	Excluded
102	Pathogenic implications of dysregulated miRNAs in propionic acidemia related cardiomyopathy	Fulgencio-Covián A, Alonso-Barroso E, Guenzel AJ, Rivera-Barahona A, Ugarte M, Pérez B, Barry MA, Pérez-Cerdá C, Richard E, Desviat LR.	2020	PASS	Improper diagnosis
103	Circular RNA circACSL1 aggravated myocardial inflammation and myocardial injury by sponging miR-8055 and regulating MAPK14 expression	Zhang L, Han B, Liu H, Wang J, Feng X, Sun W, Cai D, Jia H, Jiang D.	2021	PASS	Not miRNA/cfDNA
105	MicroRNA-195-5p Downregulation Inhibits Endothelial Mesenchymal Transition and Myocardial Fibrosis in Diabetic Cardiomyopathy by Targeting Smad7 and Inhibiting Transforming Growth Factor Beta 1-Smads-Snail Pathway	Ding H, Yao J, Xie H, Wang C, Chen J, Wei K, Ji Y, Liu L.	2021	Excluded
106	Pharmacological Silencing of MicroRNA-152 Prevents Pressure Overload-Induced Heart Failure	LaRocca TJ, Seeger T, Prado M, Perea-Gil I, Neofytou E, Mecham BH, Ameen M, Chang ACY, Pandey G, Wu JC, Karakikes I.	2020	Excluded
107	Similarity and difference of pathogenesis among lung cancer subtypes suggested by expression profile data	Dong A, Wang ZW, Ni N, Li L, Kong XY.	2021	Excluded
108	Long noncoding RNA NONHSAT177112.1 aggravates inflammation and apoptosis in LPS-treated human cardiomyocytes	Kong Y, Han B, Zhang L, Liu Q, Zheng G, Guo K, Chen Q, Chen Z.	2021	Excluded
109	Right ventricular morphology and function is not related with microRNAs and fibrosis markers in dilated cardiomyopathy	Rubiś P, Totoń-Żurańska J, Wiśniowska-Śmiałek S, Kołton-Wróż M, Wołkow P, Wypasek E, Rudnicka-Sosin L, Pawlak A, Kozanecki K, Tomkiewicz-Pająk L, Podolec P.	2018	Excluded
110	mRNA-miRNA integrative analysis of diabetes-induced cardiomyopathy in rats	Lopes MB, Freitas RC, Hirata MH, Hirata R, Rezende AA, Silbiger VN, Bortolin RH, Luchessi AD.	2017	Excluded
111	The Genetic Determination of the Differentiation Between Ischemic Dilated Cardiomyopathy and Idiopathic Dilated Cardiomyopathy	Onrat ST, Onrat E, Ercan Onay E, Yalım Z, Avşar A.	2018	PASS	PASS
112	Therapeutic Delivery of miR-148a Suppresses Ventricular Dilation in Heart Failure	Raso A, Dirkx E, Philippen LE, Fernandez-Celis A, De Majo F, Sampaio-Pinto V, Sansonetti M, Juni R, El Azzouzi H, Calore M, Bitsch N, Olieslagers S, Oerlemans MIFJ, Huibers MM, de Weger RA, Reckman YJ, Pinto YM, Zentilin L, Zacchigna S, Giacca M, da Costa Martins PA, López-Andrés N, De Windt LJ.	2019	Excluded
113	ERBB4 and Multiple MicroRNAs That Target ERBB4 Participate in Pregnancy-Related Cardiomyopathy	Feyen E, Ricke-Hoch M, Van Fraeyenhove J, Vermeulen Z, Scherr M, Dugaucquier L, Viereck J, Bruyns T, Thum T, Segers VFM, Hilfiker-Kleiner D, De Keulenaer GW.	2021	Excluded
114	MicroRNA-Detargeted Mengovirus for Oncolytic Virotherapy	Ruiz AJ, Hadac EM, Nace RA, Russell SJ.	2016	Excluded
115	MiRNA Signaling in Viral Myocarditis Novel and Unique Pathological Features	Wang Y, Wei CX, Shao LQ, Zhao M.	2018	Excluded
116	Sexual dimorphisms of mRNA and miRNA in human/murine heart disease	Tsuji M, Kawasaki T, Matsuda T, Arai T, Gojo S, Takeuchi JK.	2017	Excluded
117	Double overexpression of miR-19a and miR-20a in induced pluripotent stem cell-derived mesenchymal stem cells effectively preserves the left ventricular function in dilated cardiomyopathic rat	Sheu JJ, Chai HT, Sung PH, Chiang JY, Huang TH, Shao PL, Wu SC, Yip HK.	2021	Excluded
118	miR-155-5p upregulation ameliorates myocardial insulin resistance via mTOR signaling in chronic alcohol drinking rats	Li Z, Hu Z, Meng Y, Xu H, Wei Y, Shen D, Bai H, Yuan H, Chen L.	2021	Excluded
119	Small RNA-sequencing identified the potential roles of neuron differentiation and MAPK signaling pathway in dilated cardiomyopathy	Huang G, Cao M, Huang Z, Xiang Y, Liu J, Wang Y, Wang J, Yang W.	2019	PASS	Improper diagnosis
120	Identification of micro-RNA networks in end-stage heart failure because of dilated cardiomyopathy	Zhu X, Wang H, Liu F, Chen L, Luo W, Su P, Li W, Yu L, Yang X, Cai J.	2013	Excluded
121	MicroRNAs--regulators of signaling networks in dilated cardiomyopathy	Naga Prasad SV, Karnik SS.	2010	Excluded
122	MicroRNA-381 protects myocardial cell function in children and mice with viral myocarditis via targeting cyclooxygenase-2 expression	Zhang Y, Sun L, Sun H, Yu Z, Liu X, Luo X, Li C, Sun D, Li T.	2018	PASS	PASS
123	MicroRNAs as therapeutic targets in cardiomyopathies: myth or reality?	Nair N, Gongora E.	2014	Excluded
124	New Molecular Insights of Insulin in Diabetic Cardiomyopathy	Westermeier F, Riquelme JA, Pavez M, Garrido V, Díaz A, Verdejo HE, Castro PF, García L, Lavandero S.	2016	Excluded
125	Alteration in microRNA-25 expression regulate cardiac function via renin secretion	Li H, Xie Y, Liu Y, Qi Y, Tang C, Li X, Zuo K, Sun D, Shen Y, Pang D, Chu Y, Zhao B.	2018	PASS	PASS
126	Differential Expression Profiles and Functional Prediction of Circular RNAs in Pediatric Dilated Cardiomyopathy	Sun W, Han B, Cai D, Wang J, Jiang D, Jia H.	2020	Excluded
127	Properties of autonomous 3'-->5' exonucleases	Krutyakov VM.	2009	Excluded
128	Identification of microRNAs in skeletal muscle associated with lung cancer cachexia	van de Worp WRPH, Schols AMWJ, Dingemans AC, Op den Kamp CMH, Degens JHRJ, Kelders MCJM, Coort S, Woodruff HC, Kratassiouk G, Harel-Bellan A, Theys J, van Helvoort A, Langen RCJ.	2020	Excluded
131	Role of microRNAs in the pathogenesis of diabetic cardiomyopathy	Liu X, Liu S.	2017	Excluded
132	Long non-coding RNA MEG3 inhibits M2 macrophage polarization by activating TRAF6 via microRNA-223 down-regulation in viral myocarditis	Xue YL, Zhang SX, Zheng CF, Li YF, Zhang LH, Su QY, Hao YF, Wang S, Li XW.	2020	Excluded
133	Inherited Cardiomyopathies and the Role of Mutations in Non-coding Regions of the Genome	Salman OF, El-Rayess HM, Abi Khalil C, Nemer G, Refaat MM.	2018	Excluded
134	Circulating microRNAs as diagnostic biomarkers for cardiovascular diseases	Tijsen AJ, Pinto YM, Creemers EE.	2012	Excluded
135	What causes a broken heart--molecular insights into heart failure	Barry SP, Townsend PA.	2010	Excluded
136	MicroRNA-98 plays a critical role in experimental myocarditis	Chen X, Dong S, Zhang N, Chen L, Li MG, Yang PC, Song J.	2017	Excluded
137	Opportunities for microRNAs in the Crowded Field of Cardiovascular Biomarkers	Halushka PV, Goodwin AJ, Halushka MK.	2019	Excluded
138	The regulatory role of miR-107 in Coxsackie B3 virus replication	Yao M, Xu C, Shen H, Liu T, Wang X, Shao C, Shao S.	2020	Excluded
139	Advancement of Mechanisms of Coxsackie Virus B3-Induced Myocarditis Pathogenesis and the Potential Therapeutic Targets	Daba TM, Zhao Y, Pan Z.	2019	Excluded
140	A microRNA Expression Profile as Non-Invasive Biomarker in a Large Arrhythmogenic Cardiomyopathy Cohort	Bueno Marinas M, Celeghin R, Cason M, Bariani R, Frigo AC, Jager J, Syrris P, Elliott PM, Bauce B, Thiene G, Corrado D, Basso C, Pilichou K.	2020	Excluded
141	Diagnostic methods for the canine idiopathic dilated cardiomyopathy: A narrative evidence-based rapid review	Pérez JM, Alessi C, Grzech-Wojciechowska M.	2020	Excluded
142	Editor's Choice-Biomarkers of acute cardiovascular and pulmonary diseases	Suzuki T, Lyon A, Saggar R, Heaney LM, Aizawa K, Cittadini A, Mauro C, Citro R, Limongelli G, Ferrara F, Vriz O, Morley-Smith A, Calabrò P, Bossone E.	2016	Excluded
143	Expression of Bcl-2 and microRNAs in cardiac tissues of patients with dilated cardiomyopathy	Wang Y, Li M, Xu L, Liu J, Wang D, Li Q, Wang L, Li P, Chen S, Liu T.	2017	PASS	Improper diagnosis
144	Circ-HIPK2 Accelerates Cell Apoptosis and Autophagy in Myocardial Oxidative Injury by Sponging miR-485-5p and Targeting ATG101	Zhou J, Li L, Hu H, Wu J, Chen H, Feng K, Ma L.	2020	Excluded
145	The long non-coding RNA H19 promotes cardiomyocyte apoptosis in dilated cardiomyopathy	Zhang Y, Zhang M, Xu W, Chen J, Zhou X.	2017	Excluded
146	Plasma microRNAs as biomarkers for Lamin A/C-related dilated cardiomyopathy	Toro R, Blasco-Turrión S, Morales-Ponce FJ, Gonzalez P, Martínez-Camblor P, López-Granados A, Brugada R, Campuzano O, Pérez-Serra A, Rosa Longobardo F, Mangas A, Llorente-Cortes V, de Gonzalo-Calvo D.	2018	Excluded
147	MicroRNA miR-301a is a novel cardiac regulator of Cofilin-2	Rangrez AY, Hoppe P, Kuhn C, Zille E, Frank J, Frey N, Frank D.	2017	Excluded
148	The Role of p38 MAPK in the Development of Diabetic Cardiomyopathy	Wang S, Ding L, Ji H, Xu Z, Liu Q, Zheng Y.	2016	Excluded
149	Silencing lncRNA GAS5 alleviates apoptosis and fibrosis in diabetic cardiomyopathy by targeting miR-26a/b-5p	Zhu C, Zhang H, Wei D, Sun Z.	2021	Excluded
151	The potential role of plasma miR-155 and miR-206 as circulatory biomarkers in inflammatory cardiomyopathy	Obradovic D, Rommel KP, Blazek S, Klingel K, Gutberlet M, Lücke C, Büttner P, Thiele H, Adams V, Lurz P, Emrich F, Besler C.	2021	PASS	PASS
152	Differential expression of circulating miRNAs as a novel tool to assess BAG3-associated familial dilated cardiomyopathy	Zaragoza C, Saura M, Hernández I, Ramirez-Carracedo R, García-García F, Zamorano JL, Mangas A, Toro R.	2019	Excluded
153	Inhibition of microRNA-346 inhibits myocardial inflammation and apoptosis after myocardial infarction via targeting NFIB	Yang B, Dong R, Zhao H.	2020	Excluded
154	The microRNA-221/-222 cluster balances the antiviral and inflammatory response in viral myocarditis	Corsten MF, Heggermont W, Papageorgiou AP, Deckx S, Tijsma A, Verhesen W, van Leeuwen R, Carai P, Thibaut HJ, Custers K, Summer G, Hazebroek M, Verheyen F, Neyts J, Schroen B, Heymans S.	2015	PASS	Animal study
155	MicroRNA-200c modulates DUSP-1 expression in diabetes-induced cardiac hypertrophy	Singh GB, Raut SK, Khanna S, Kumar A, Sharma S, Prasad R, Khullar M.	2017	Excluded
156	Inhibition of miR-223 attenuates the NLRP3 inflammasome activation, fibrosis, and apoptosis in diabetic cardiomyopathy	Xu D, Zhang X, Chen X, Yang S, Chen H.	2020	Excluded
157	CircSNHG5 Sponges Mir-495-3p and Modulates CITED2 to Protect Cartilage Endplate From Degradation	Zhang J, Hu S, Ding R, Yuan J, Jia J, Wu T, Cheng X.	2021	Excluded
158	The relationship between myocardial fibrosis and myocardial microRNAs in dilated cardiomyopathy: A link between mir-133a and cardiovascular events	Rubiś P, Totoń-Żurańska J, Wiśniowska-Śmiałek S, Dziewięcka E, Kołton-Wróż M, Wołkow P, Pitera E, Rudnicka-Sosin L, Garlitski AC, Gackowski A, Podolec P.	2018	PASS	PASS
159	Identification and Validation of Dilated Cardiomyopathy-Related Genes via Bioinformatics Analysis	Wang LJ, Qiu BQ, Yuan MM, Zou HX, Gong CW, Huang H, Lai SQ, Liu JC.	2022	PASS	Public dataset analysis
160	Peripheral Blood MicroRNAs as Potential Biomarkers of Myocardial Damage in Acute Viral Myocarditis	Marketou M, Kontaraki J, Patrianakos A, Kochiadakis G, Anastasiou I, Fragkiadakis K, Plevritaki A, Papadaki ST, Chlouverakis G, Parthenakis F.	2021	PASS	PASS
161	Bioinformatics prediction of potential mechanisms and biomarkers underlying dilated cardiomyopathy	Liu Z, Song YN, Chen KY, Gao WL, Chen HJ, Liang GY.	2022	Excluded
162	Recent advances in animal and human pluripotent stem cell modeling of cardiac laminopathy	Lee YK, Jiang Y, Ran XR, Lau YM, Ng KM, Lai WH, Siu CW, Tse HF.	2016	Excluded
163	Apoptosis in patients with dilated cardiomyopathy and diabetes: a feature of diabetic cardiomyopathy?	Kuethe F, Sigusch HH, Bornstein SR, Hilbig K, Kamvissi V, Figulla HR.	2007	Excluded
164	Cardiomyocyte-specific miRNA-30c over-expression causes dilated cardiomyopathy	Wijnen WJ, van der Made I, van den Oever S, Hiller M, de Boer BA, Picavet DI, Chatzispyrou IA, Houtkooper RH, Tijsen AJ, Hagoort J, van Veen H, Everts V, Ruijter JM, Pinto YM, Creemers EE.	2014	Excluded
165	NORAD regulates proliferation and apoptosis in cardiomyocytes under high-glucose treatment through miRNA-150-5p/ZEB1 axis	Han Y, Tian H, Gao X.	2020	Excluded
166	Geniposide Attenuates LPS-Induced Injury via Up-Regulation of miR-145 in H9c2 Cells	Su Q, Yao J, Sheng C.	2018	Excluded
167	Analyzing gene expression profiles in dilated cardiomyopathy via bioinformatics methods	Wang L, Zhu L, Luan R, Wang L, Fu J, Wang X, Sui L.	2016	PASS	Public dataset analysis
168	Potential New Blood Biomarker for Myocarditis Detection	Abbasi J.	2021	Excluded
169	Combination of Dendrobium Mixture and Metformin Curbs the Development and Progression of Diabetic Cardiomyopathy by Targeting the lncRNA NEAT1	Qin W, Zhao X, Tai J, Qin G, Yu S.	2021	Excluded
170	High-throughput transcriptome-Seq and small RNA-Seq reveal novel functional genes and microRNAs for early embryonic arrest in humans	Yang W, Lu Z, Zhi Z, Liu L, Deng L, Jiang X, Pang L.	2019	Excluded
171	Circulating microRNAs levels in Chinese heart failure patients caused by dilated cardiomyopathy	Fan KL, Zhang HF, Shen J, Zhang Q, Li XL.	2013	PASS	PASS
172	Circulating miR-185 might be a novel biomarker for clinical outcome in patients with dilated cardiomyopathy	Yu M, Liang W, Xie Y, Long Q, Cheng X, Liao YH, Yuan J.	2016	PASS	PASS
174	MiR-144 affects proliferation and apoptosis of high glucose-induced AC16 cardiomyocytes by regulating CTRP3/JNK signaling	Song Y, Mai H, Lin Y, Wang Y, Wang X, Gu S.	2020	Excluded
175	Roles and Mechanisms of Herbal Medicine for Diabetic Cardiomyopathy: Current Status and Perspective	Tian J, Zhao Y, Liu Y, Liu Y, Chen K, Lyu S.	2017	Excluded
176	[Effect of mitochondrial dysfunction in diabetic cardiomyopathy and intervention of traditional Chinese medicine]	Tian J, Lv R, Guo W.	2018	Excluded
177	Functional Screening Identifies MicroRNAs as Multi-Cellular Regulators of Heart Failure	Verjans R, Derks WJA, Korn K, Sönnichsen B, van Leeuwen REW, Schroen B, van Bilsen M, Heymans S.	2019	PASS	Animal study
178	MicroRNAs and long non-coding RNAs in the pathophysiological processes of diabetic cardiomyopathy: emerging biomarkers and potential therapeutics	Jakubik D, Fitas A, Eyileten C, Jarosz-Popek J, Nowak A, Czajka P, Wicik Z, Sourij H, Siller-Matula JM, De Rosa S, Postula M.	2021	Excluded
179	Acute Limb Ischemia: A Catastrophic COVID-19 Sequel Leading to Amputation	Biswal JK, Mohanty SK, Behera SN, Swain SK, Sahoo AK.	2021	Excluded
180	Collective transcriptomic deregulation of hypertrophic and dilated cardiomyopathy - Importance of fibrotic mechanism in heart failure	Malgija B, Kumar NS, Piramanayagam S.	2018	PASS	Public dataset analysis
181	Changes in miR 21 and 23b expression in postnatal hypertrophic heart derived from gestational diabetes precede dilated cardiomyopathy	-Camarillo CO, Diaz-Rosas G, Avalos-Rodri Guez A, Martinez-Hernandez MAG, Balderrabano-Saucedo N, Contreras-Ramos A.	2021	Excluded
183	Cardiomyocytes Derived from Induced Pluripotent Stem Cells as a Disease Model for Propionic Acidemia	Alonso-Barroso E, Pérez B, Desviat LR, Richard E.	2021	Excluded
184	NORAD lentivirus shRNA mitigates fibrosis and inflammatory responses in diabetic cardiomyopathy via the ceRNA network of NORAD/miR-125a-3p/Fyn	Liu Y, Zhu Y, Liu S, Liu J, Li X.	2021	Excluded
185	MicroRNA-146a is a therapeutic target and biomarker for peripartum cardiomyopathy	Halkein J, Tabruyn SP, Ricke-Hoch M, Haghikia A, Nguyen NQ, Scherr M, Castermans K, Malvaux L, Lambert V, Thiry M, Sliwa K, Noel A, Martial JA, Hilfiker-Kleiner D, Struman I.	2013	Excluded
186	Implication of microRNA as a potential biomarker of myocarditis	Oh JH, Kim GB, Seok H.	2022	Excluded
187	Micro-RNA expression in hypoplastic left heart syndrome	Sucharov CC, Sucharov J, Karimpour-Fard A, Nunley K, Stauffer BL, Miyamoto SD.	2015	Excluded
188	MiR-337-3p Promotes Adipocyte Browning by Inhibiting TWIST1	Vonhögen IGC, El Azzouzi H, Olieslagers S, Vasilevich A, de Boer J, Tinahones FJ, da Costa Martins PA, de Windt LJ, Murri M.	2020	Excluded
189	MicroRNA-20b suppresses the expression of ZFP-148 in viral myocarditis	Xu HF, Gao XT, Lin JY, Xu XH, Hu J, Ding YJ, Zhu SH.	2017	Excluded
190	Silencing MicroRNA-155 Attenuates Cardiac Injury and Dysfunction in Viral Myocarditis via Promotion of M2 Phenotype Polarization of Macrophages	Zhang Y, Zhang M, Li X, Tang Z, Wang X, Zhong M, Suo Q, Zhang Y, Lv K.	2016	Excluded
191	Neutrophil-to-lymphocyte ratio and monocyte-to-lymphocyte ratio predict length of hospital stay in myocarditis	Mirna M, Schmutzler L, Topf A, Hoppe UC, Lichtenauer M.	2021	Excluded
192	Genomic structural variations lead to dysregulation of important coding and non-coding RNA species in dilated cardiomyopathy	Haas J, Mester S, Lai A, Frese KS, Sedaghat-Hamedani F, Kayvanpour E, Rausch T, Nietsch R, Boeckel JN, Carstensen A, Völkers M, Dietrich C, Pils D, Amr A, Holzer DB, Martins Bordalo D, Oehler D, Weis T, Mereles D, Buss S, Riechert E, Wirsz E, Wuerstle M, Korbel JO, Keller A, Katus HA, Posch AE, Meder B.	2018	Excluded
193	LAZ3 protects cardiac remodeling in diabetic cardiomyopathy via regulating miR-21/PPARa signaling	Gao L, Liu Y, Guo S, Xiao L, Wu L, Wang Z, Liang C, Yao R, Zhang Y.	2018	Excluded
194	"Omics" data integration and functional analyses link Enoyl-CoA hydratase, short chain 1 to drug refractory dilated cardiomyopathy	Campbell NV, Weitzenkamp DA, Campbell IL, Schmidt RF, Hicks C, Morgan MJ, Irwin DC, Tentler JJ.	2018	PASS	Public dataset analysis
195	Myocardial microRNAs associated with reverse remodeling in human heart failure	Sucharov CC, Kao DP, Port JD, Karimpour-Fard A, Quaife RA, Minobe W, Nunley K, Lowes BD, Gilbert EM, Bristow MR.	2017	PASS	No control group
196	[The role and significance of microRNA in human cardiovascular disease and forensic science]	Li LL, Zhao ZQ.	2013	Excluded
198	Up-regulation of miR-27 extenuates lipopolysaccharide-induced injury in H9c2 cells via modulating ICAM1 expression	Xiang JF, Yu JC, Zhu JY.	2019	Excluded
199	LncRNAs and miRs as epigenetic signatures in diabetic cardiac fibrosis: new advances and perspectives	Tao H, Song ZY, Ding XS, Yang JJ, Shi KH, Li J.	2018	Excluded
200	The effect of miR-471-3p on macrophage polarization in the development of diabetic cardiomyopathy	Liu G, Yan D, Yang L, Sun Y, Zhan L, Lu L, Jin Z, Zhang C, Long P, Chen J, Yuan Q.	2021	Excluded
201	Autoimmune myocarditis is not associated with left ventricular systolic dysfunction	Mirna M, Paar V, Kraus T, Sotlar K, Wernly B, Pistulli R, Hoppe UC, Lichtenauer M.	2019	Excluded
202	miR‑217 and miR‑543 downregulation mitigates inflammatory response and myocardial injury in children with viral myocarditis by regulating the SIRT1/AMPK/NF‑κB signaling pathway	Xia K, Zhang Y, Sun D.	2020	PASS	PASS
203	Serum exosome microRNA panel as a noninvasive biomarker for molecular diagnosis of fulminant myocarditis	Zhang Y, Li X, Wang D, Jiang X, Zhang M, Lv K.	2020	PASS	PASS
204	Inhibition of MicroRNA-9-5p Protects Against Cardiac Remodeling Following Myocardial Infarction in Mice	Xiao Y, Zhang Y, Chen Y, Li J, Zhang Z, Sun Y, Shen H, Zhao Z, Huang Z, Zhang W, Chen W, Shen Z.	2019	Excluded
205	A mitochondrial paradigm for degenerative diseases and ageing	Wallace DC.	2001	Excluded
206	MicroRNAs: a new piece in the paediatric cardiovascular disease puzzle	Omran A, Elimam D, Webster KA, Shehadeh LA, Yin F.	2013	Excluded
207	Involvement of human monogenic cardiomyopathy genes in experimental polygenic cardiac hypertrophy	Prestes PR, Marques FZ, Lopez-Campos G, Lewandowski P, Delbridge LMD, Charchar FJ, Harrap SB.	2018	Excluded
208	miRNA Genetic Variants Alter Their Secondary Structure and Expression in Patients With RASopathies Syndromes	de Carvalho JB, de Morais GL, Vieira TCDS, Rabelo NC, Llerena JC Jr, Gonzalez SMC, de Vasconcelos ATR.	2019	Excluded
209	Expression of miR-98 in myocarditis and its influence on transcription of the FAS/FASL gene pair	Zhang BY, Zhao Z, Jin Z.	2016	PASS	PASS
210	MicroRNA values in children with rheumatic carditis: a preliminary study	Gumus G, Giray D, Bobusoglu O, Tamer L, Karpuz D, Hallioglu O.	2018	PASS	PASS
212	Circulating miRNA as novel markers for diastolic dysfunction	Nair N, Kumar S, Gongora E, Gupta S.	2013	PASS	Improper diagnosis
213	Identification of dysregulated microRNAs involved in arachidonic acid metabolism regulation in dilated cardiomyopathy-mediated heart failure patients	Wang YL, Wang M, Wang XJ.	2021	Excluded
214	The forkhead transcription factor Foxo3 negatively regulates natural killer cell function and viral clearance in myocarditis	Loebel M, Holzhauser L, Hartwig JA, Shukla PC, Savvatis K, Jenke A, Gast M, Escher F, Becker SC, Bauer S, Stroux A, Beling A, Kespohl M, Pinkert S, Fechner H, Kuehl U, Lassner D, Poller W, Schultheiss HP, Zeller T, Blankenberg S, Papageorgiou AP, Heymans S, Landmesser U, Scheibenbogen C, Skurk C.	2018	Excluded
215	Forced expression of miR-143 and -145 in cardiomyocytes induces cardiomyopathy with a reductive redox shift	Ogawa K, Noda A, Ueda J, Ogata T, Matsuyama R, Nishizawa Y, Qiao S, Iwata S, Ito M, Fujihara Y, Ichihara M, Adachi K, Takaoka Y, Iwamoto T.	2020	Excluded
216	Baicalin relieves lipopolysaccharide-evoked inflammatory injury through regulation of miR-21 in H9c2 cells	Liu X, Wang S, Zhao G.	2020	Excluded
217	Inhibition of miR-208b improves cardiac function in titin-based dilated cardiomyopathy	Zhou Q, Schötterl S, Backes D, Brunner E, Hahn JK, Ionesi E, Aidery P, Sticht C, Labeit S, Kandolf R, Gawaz M, Gramlich M.	2017	PASS	Improper diagnosis
218	MiR-20a-5p overexpression prevented diabetic cardiomyopathy via inhibition of cardiomyocyte apoptosis, hypertrophy, fibrosis and JNK/NF-κB signalling pathway	Liu X, Guo B, Zhang W, Ma B, Li Y.	2021	Excluded
219	Modulation of ADAR mRNA expression in patients with congenital heart defects	Altaf F, Vesely C, Sheikh AM, Munir R, Shah STA, Tariq A.	2019	Excluded
220	Improved diagnosis of idiopathic giant cell myocarditis and cardiac sarcoidosis by myocardial gene expression profiling	Lassner D, Kühl U, Siegismund CS, Rohde M, Elezkurtaj S, Escher F, Tschöpe C, Gross UM, Poller W, Schultheiss HP.	2014	Excluded
221	Role of microRNAs in cardiac remodelling: new insights and future perspectives	Orenes-Piñero E, Montoro-García S, Patel JV, Valdés M, Marín F, Lip GY.	2013	Excluded
223	MicroRNA-30a-5p silencing polarizes macrophages toward M2 phenotype to alleviate cardiac injury following viral myocarditis by targeting SOCS1	Zhang Y, Cai S, Ding X, Lu C, Wu R, Wu H, Shang Y, Pang M.	2021	Excluded
225	MiR-1/133 attenuates cardiomyocyte apoptosis and electrical remodeling in mice with viral myocarditis	Li W, Liu M, Zhao C, Chen C, Kong Q, Cai Z, Li D.	2020	Excluded
226	miR-410-5p promotes the development of diabetic cardiomyopathy by suppressing PIM1-induced anti-apoptosis	Xia X, Liang Y, Zheng W, Lin D, Sun S.	2020	Excluded
227	Antagonistic Interplay between MicroRNA-155 and IL-10 during Lyme Carditis and Arthritis	Lochhead RB, Zachary JF, Dalla Rosa L, Ma Y, Weis JH, O'Connell RM, Weis JJ.	2015	Excluded
228	Personalized Management of Myocarditis and Inflammatory Cardiomyopathy in Clinical Practice	Tymińska A, Ozierański K, Skwarek A, Kapłon-Cieślicka A, Baritussio A, Grabowski M, Marcolongo R, Caforio AL.	2022	Excluded
229	MicroRNAs in Inflammatory Heart Diseases and Sepsis-Induced Cardiac Dysfunction: A Potential Scope for the Future?	Mirna M, Paar V, Rezar R, Topf A, Eber M, Hoppe UC, Lichtenauer M, Jung C.	2019	Excluded
230	miR-203 accelerates apoptosis and inflammation induced by LPS via targeting NFIL3 in cardiomyocytes	Li Y, Liu X, Du A, Zhu X, Yu B.	2019	Excluded
231	MicroRNA profiling identifies microRNA-155 as an adverse mediator of cardiac injury and dysfunction during acute viral myocarditis	Corsten MF, Papageorgiou A, Verhesen W, Carai P, Lindow M, Obad S, Summer G, Coort SL, Hazebroek M, van Leeuwen R, Gijbels MJ, Wijnands E, Biessen EA, De Winther MP, Stassen FR, Carmeliet P, Kauppinen S, Schroen B, Heymans S.	2012	PASS	PASS
232	A deep sequencing approach to uncover the miRNOME in the human heart	Leptidis S, El Azzouzi H, Lok SI, de Weger R, Olieslagers S, Kisters N, Silva GJ, Heymans S, Cuppen E, Berezikov E, De Windt LJ, da Costa Martins P.	2013	PASS	No control group
233	MicroRNA-21 and -146b are involved in the pathogenesis of murine viral myocarditis by regulating TH-17 differentiation	Liu YL, Wu W, Xue Y, Gao M, Yan Y, Kong Q, Pang Y, Yang F.	2013	Excluded
234	[Silencing miRNA210 Alleviates Myocardial Cell Damage in Myocarditis by Hypoxia Inducible Factor-vascular Endothelial Growth Factor Pathway]	Li H, Yang Z, Gao F, Zhang R, Chai C.	2020	Excluded
235	Detection and comparison of microRNA expression in the serum of Doberman Pinschers with dilated cardiomyopathy and healthy controls	Steudemann C, Bauersachs S, Weber K, Wess G.	2013	Excluded
236	Transcriptome analysis reveals dynamic changes in coxsackievirus A16 infected HEK 293T cells	Jin J, Li R, Jiang C, Zhang R, Ge X, Liang F, Sheng X, Dai W, Chen M, Wu J, Xiao J, Su W.	2017	Excluded
237	Long non-coding RNA KCNQ1OT1 increases the expression of PDCD4 by targeting miR-181a-5p, contributing to cardiomyocyte apoptosis in diabetic cardiomyopathy	Zhao SF, Ye YX, Xu JD, He Y, Zhang DW, Xia ZY, Wang S.	2021	Excluded
238	Inhibition of long non-coding RNA metastasis-associated lung adenocarcinoma transcript 1 attenuates high glucose-induced cardiomyocyte apoptosis via regulation of miR-181a-5p	Cheng Y, Li J, Wang C, Yang H, Wang Y, Zhan T, Guo S, Liang J, Bai Y, Yu J, Liu G.	2020	Excluded
239	The protective role of microRNA-21 against coxsackievirus B3 infection through targeting the MAP2K3/P38 MAPK signaling pathway	He F, Xiao Z, Yao H, Li S, Feng M, Wang W, Liu Z, Liu Z, Wu J.	2019	Excluded
240	Inhibition of microRNA-15 protects H9c2 cells against CVB3-induced myocardial injury by targeting NLRX1 to regulate the NLRP3 inflammasome	Tong R, Jia T, Shi R, Yan F.	2020	Excluded
241	MicroRNAs target gene and signaling pathway by bioinformatics analysis in the cardiac hypertrophy	Shen E, Diao X, Wei C, Wu Z, Zhang L, Hu B.	2010	Excluded
242	Electron transport chain defects in heart failure	Casademont J, Miró O.	2002	Excluded
243	Fibrosis and Fibrotic Gene Expression in Pediatric and Adult Patients With Idiopathic Dilated Cardiomyopathy	Woulfe KC, Siomos AK, Nguyen H, SooHoo M, Galambos C, Stauffer BL, Sucharov C, Miyamoto S.	2017	PASS	PASS
244	Predictors and prevention of diabetic cardiomyopathy	Chavali V, Tyagi SC, Mishra PK.	2013	Excluded
245	Loss of cardiac microRNA-mediated regulation leads to dilated cardiomyopathy and heart failure	Rao PK, Toyama Y, Chiang HR, Gupta S, Bauer M, Medvid R, Reinhardt F, Liao R, Krieger M, Jaenisch R, Lodish HF, Blelloch R.	2009	PASS	Animal study
246	Weighted gene co-expression network analysis identified underlying hub genes and mechanisms in the occurrence and development of viral myocarditis	Ma Z, Shen Z, Gong Y, Zhou J, Chen X, Lv Q, Wang M, Chen J, Yu M, Fu G, He H, Lai D.	2020	Excluded
247	Astragaloside-IV protects H9C2(2-1) cardiomyocytes from high glucose-induced injury via miR-34a-mediated autophagy pathway	Zhu Y, Qian X, Li J, Lin X, Luo J, Huang J, Jin Z.	2019	Excluded
249	Let-7 in cardiovascular diseases, heart development and cardiovascular differentiation from stem cells	Bao MH, Feng X, Zhang YW, Lou XY, Cheng Y, Zhou HH.	2013	Excluded
250	Intrinsic Electrical Remodeling Underlies Atrioventricular Block in Athletes	Mesirca P, Nakao S, Nissen SD, Forte G, Anderson C, Trussell T, Li J, Cox C, Zi M, Logantha S, Yaar S, Cartensen H, Bidaud I, Stuart L, Soattin L, Morris GM, da Costa Martins PA, Cartwright EJ, Oceandy D, Mangoni ME, Jespersen T, Buhl R, Dobrzynski H, Boyett MR, D'Souza A.	2021	Excluded
251	Circulating miR-4763-3p Is a Novel Potential Biomarker Candidate for Human Adult Fulminant Myocarditis	Nie X, He M, Wang J, Chen P, Wang F, Lai J, Li C, Yu T, Zuo H, Cui G, Miao K, Jiang J, Wang DW, Chen C.	2020	PASS	PASS
252	LncRNA GAS5 inhibits NLRP3 inflammasome activation-mediated pyroptosis in diabetic cardiomyopathy by targeting miR-34b-3p/AHR	Xu Y, Fang H, Xu Q, Xu C, Yang L, Huang C.	2020	Excluded
253	MicroRNA Let-7i negatively regulates cardiac inflammation and fibrosis	Wang X, Wang HX, Li YL, Zhang CC, Zhou CY, Wang L, Xia YL, Du J, Li HH.	2015	Excluded
254	Expression of microRNA-208 is associated with adverse clinical outcomes in human dilated cardiomyopathy	Satoh M, Minami Y, Takahashi Y, Tabuchi T, Nakamura M.	2010	PASS	Improper diagnosis
255	p53 and Mdm2 act synergistically to maintain cardiac homeostasis and mediate cardiomyocyte cell cycle arrest through a network of microRNAs	Stanley-Hasnain S, Hauck L, Grothe D, Aschar-Sobbi R, Beca S, Butany J, Backx PH, Mak TW, Billia F.	2017	Excluded
256	Recent Developments on the Crosstalk Between STAT3 and Inflammation in Heart Function and Disease	Kurdi M, Zgheib C, Booz GW.	2018	Excluded
257	Dec1 deficiency protects the heart from fibrosis, inflammation, and myocardial cell apoptosis in a mouse model of cardiac hypertrophy	Li X, Le HT, Sato F, Kang TH, Makishima M, Zhong L, Liu Y, Guo L, Bhawal UK.	2020	Excluded
258	miR-16 exhibits protective function in LPS-treated cardiomyocytes by targeting DOCK2 to repress cell apoptosis and exert anti-inflammatory effect	Wang L, Zhang Y, Zhu G, Ma Y, Zuo H, Tian X.	2020	Excluded
259	Application Route and Immune Status of the Host Determine Safety and Oncolytic Activity of Oncolytic Coxsackievirus B3 Variant PD-H	Hazini A, Dieringer B, Klingel K, Pryshliak M, Geisler A, Kobelt D, Daberkow O, Kurreck J, Linthout SV, Fechner H.	2021	Excluded
260	Transforming growth factor beta (TGF-β) mediates cardiac fibrosis and induces diabetic cardiomyopathy	Yue Y, Meng K, Pu Y, Zhang X.	2017	Excluded
261	Non-Coding RNAs as Blood-Based Biomarkers in Cardiovascular Disease	Videira RF, da Costa Martins PA, Falcão-Pires I.	2020	Excluded
262	Plasmatic and chamber-specific modulation of cardiac microRNAs in an acute model of DOX-induced cardiotoxicity	Gioffré S, Ricci V, Vavassori C, Ruggeri C, Chiesa M, Alfieri I, Zorzan S, Buzzetti M, Milano G, Scopece A, Castiglioni L, Sironi L, Pompilio G, Colombo GI, D'Alessandra Y.	2019	Excluded
263	MicroRNA-19b Downregulates Gap Junction Protein Alpha1 and Synergizes with MicroRNA-1 in Viral Myocarditis	Lin J, Xue A, Li L, Li B, Li Y, Shen Y, Sun N, Chen R, Xu H, Zhao Z.	2016	Excluded
264	Development of a new mouse model for coxsackievirus-induced myocarditis by attenuating coxsackievirus B3 virulence in the pancreas	Pinkert S, Pryshliak M, Pappritz K, Knoch K, Hazini A, Dieringer B, Schaar K, Dong F, Hinze L, Lin J, Lassner D, Klopfleisch R, Solimena M, Tschöpe C, Kaya Z, El-Shafeey M, Beling A, Kurreck J, Van Linthout S, Klingel K, Fechner H.	2020	Excluded
265	MicroRNA dysregulation in diabetic ischemic heart failure patients	Greco S, Fasanaro P, Castelvecchio S, D'Alessandra Y, Arcelli D, Di Donato M, Malavazos A, Capogrossi MC, Menicanti L, Martelli F.	2012	Excluded
266	Inhibition of long non-coding RNA TUG1 protects against diabetic cardiomyopathy induced diastolic dysfunction by regulating miR-499-5p	Zhao L, Li W, Zhao H.	2020	Excluded
267	Effects of microrna-93 on mouse cardiac microvascular endothelial cells injury and inflammatory response by mediating SPP1 through the NF-ΚB pathway	Ma SX, Bai ZF, Wang W, Wu HY.	2019	Excluded
268	miRNAs may play a major role in the control of gene expression in key pathobiological processes in Chagas disease cardiomyopathy	Laugier L, Ferreira LRP, Ferreira FM, Cabantous S, Frade AF, Nunes JP, Ribeiro RA, Brochet P, Teixeira PC, Santos RHB, Bocchi EA, Bacal F, Cândido DDS, Maso VE, Nakaya HI, Kalil J, Cunha-Neto E, Chevillard C.	2020	Excluded
269	A cellular microRNA, let-7i, is a novel biomarker for clinical outcome in patients with dilated cardiomyopathy	Satoh M, Minami Y, Takahashi Y, Tabuchi T, Nakamura M.	2011	PASS	Improper diagnosis
270	Differential expression profiles and functional analysis of circular RNAs in children with fulminant myocarditis	Zhang L, Han B, Wang J, Liu Q, Kong Y, Jiang D, Jia H.	2019	PASS	Not miRNA/cfDNA
271	Concerted regulation of mitochondrial and nuclear non-coding RNAs by a dual-targeted RNase Z	Siira SJ, Rossetti G, Richman TR, Perks K, Ermer JA, Kuznetsova I, Hughes L, Shearwood AJ, Viola HM, Hool LC, Rackham O, Filipovska A.	2018	Excluded
273	MicroRNA-22 regulates cardiac hypertrophy and remodeling in response to stress	Huang ZP, Chen J, Seok HY, Zhang Z, Kataoka M, Hu X, Wang DZ.	2013	Excluded
274	Knocking out viral myocarditis: reality or a miRage?	Sun X, Feinberg MW.	2012	Excluded
275	An overview on medicinal perspective of thiazolidine-2,4-dione: A remarkable scaffold in the treatment of type 2 diabetes	Bansal G, Thanikachalam PV, Maurya RK, Chawla P, Ramamurthy S.	2020	Excluded
276	MicroRNA-142-3p inhibits high-glucose-induced endothelial-to-mesenchymal transition through targeting TGF-β1/Smad pathway in primary human aortic endothelial cells	Zhu GH, Li R, Zeng Y, Zhou T, Xiong F, Zhu M.	2018	Excluded
277	microRNA-34a aggravates coxsackievirus B3-induced apoptosis of cardiomyocytes through the SIRT1-p53 pathway	Jiang D, Li M, Yu Y, Shi H, Chen R.	2019	Excluded
278	A Comprehensive miRNome Analysis of Macrophages Isolated from db/db Mice and Selected miRNAs Involved in Metabolic Syndrome-Associated Cardiac Remodeling	Niderla-Bielińska J, Ścieżyńska A, Moskalik A, Jankowska-Steifer E, Bartkowiak K, Bartkowiak M, Kiernozek E, Podgórska A, Ciszek B, Majchrzak B, Ratajska A.	2021	Excluded
279	Overexpression of microRNA-133b reduces myocardial injuries in children with viral myocarditis by targeting Rab27B gene	Zhang Y, Sun L, Sun H, Liu X, Luo X, Li C, Sun D, Li T.	2017	PASS	No control group
280	Multifaceted roles of miR-1s in repressing the fetal gene program in the heart	Wei Y, Peng S, Wu M, Sachidanandam R, Tu Z, Zhang S, Falce C, Sobie EA, Lebeche D, Zhao Y.	2014	Excluded
281	Compromised Anti-inflammatory Action of Neutrophil Extracellular Traps in PAD4-Deficient Mice Contributes to Aggravated Acute Inflammation After Myocardial Infarction	Eghbalzadeh K, Georgi L, Louis T, Zhao H, Keser U, Weber C, Mollenhauer M, Conforti A, Wahlers T, Paunel-Görgülü A.	2019	Excluded
282	Circulating MicroRNAs: a Potential Biomarker for Cardiac Damage, Inflammatory Response, and Left Ventricular Function Recovery in Pediatric Viral Myocarditis	Goldberg L, Tirosh-Wagner T, Vardi A, Abbas H, Pillar N, Shomron N, Nevo-Caspi Y, Paret G.	2018	PASS	No control group
284	MicroRNA signatures in peripheral blood mononuclear cells of chronic heart failure patients	Voellenkle C, van Rooij J, Cappuzzello C, Greco S, Arcelli D, Di Vito L, Melillo G, Rigolini R, Costa E, Crea F, Capogrossi MC, Napolitano M, Martelli F.	2010	PASS	PASS
285	Identification of Key Genes Affecting Results of Hyperthermia in Osteosarcoma Based on Integrative ChIP-Seq/TargetScan Analysis	Shi Y, Yang F, Wei S, Xu G.	2017	Excluded
286	Exploitation of nuclear protein SFPQ by the encephalomyocarditis virus to facilitate its replication	Zhou B, Wu F, Han J, Qi F, Ni T, Qian F.	2019	Excluded
287	Altered exosomal miR-181d and miR-30a related to the pathogenesis of CVB3 induced myocarditis by targeting SOCS3	Fan KL, Li MF, Cui F, Feng F, Kong L, Zhang FH, Hao H, Yin MX, Liu Y.	2019	PASS	PASS
288	Secretion of miRNA-326-3p by senescent adipose exacerbates myocardial metabolism in diabetic mice	Lin H, Chen X, Pan J, Ke J, Zhang A, Liu Y, Wang C, Chang ACY, Gu J.	2022	Excluded
289	Chondrogenic differentiation of synovial fluid mesenchymal stem cells on human meniscus-derived decellularized matrix requires exogenous growth factors	Liang Y, Idrees E, Szojka ARA, Andrews SHJ, Kunze M, Mulet-Sierra A, Jomha NM, Adesida AB.	2018	Excluded
290	MiR-21 confers resistance against CVB3-induced myocarditis by inhibiting PDCD4-mediated apoptosis	He J, Yue Y, Dong C, Xiong S.	2013	Excluded
291	[The effect of microRNA-21 on myocardial fibrosis in mice with chronic viral myocarditis]	Xue YM, Chen MG, Chen DW, Wu WF, Liu YL, Lin FH.	2018	Excluded
292	Construction of Immune-Related ceRNA Network in Dilated Cardiomyopathy: Based on Sex Differences	Liu C, Liu J, Wu D, Luo S, Li W, Chen L, Liu Z, Yu B.	2022	Excluded
293	Interference of circRNA HIPK3 alleviates cardiac dysfunction in lipopolysaccharide-induced mice models and apoptosis in H9C2 cardiomyocytes	Fan S, Hu K, Zhang D, Liu F.	2020	Excluded
294	miR-146a mediates inflammatory changes and fibrosis in the heart in diabetes	Feng B, Chen S, Gordon AD, Chakrabarti S.	2017	Excluded
295	MiR-16, as a potential NF-κB-related miRNA, exerts anti-inflammatory effects on LPS-induced myocarditis via mediating CD40 expression: A preliminary study	Li QQ, Xi J, Li BQ, Li N.	2020	Excluded
296	Heart Failure in Chronic Myocarditis: A Role for microRNAs?	van den Hoogen P, van den Akker F, Deddens JC, Sluijter JP.	2015	Excluded
297	Emodin Attenuates Lipopolysaccharide-Induced Injury via Down-Regulation of miR-223 in H9c2 Cells	Yang Y, Jiang Z, Zhuge D.	2019	Excluded
298	Whether Circulating miRNAs or miRNA-Carriers Serve as Biomarkers for Acute Myocardial Infarction	Zhu H, Fan GC.	2012	Excluded
299	MicroRNA-30a Modulates Type I Interferon Responses to Facilitate Coxsackievirus B3 Replication Via Targeting Tripartite Motif Protein 25	Li J, Xie Y, Li L, Li X, Shen L, Gong J, Zhang R.	2021	Excluded
300	miR-340-5p Mediates Cardiomyocyte Oxidative Stress in Diabetes-Induced Cardiac Dysfunction by Targeting Mcl-1	Zhu Y, Yang X, Zhou J, Chen L, Zuo P, Chen L, Jiang L, Li T, Wang D, Xu Y, Li Q, Yan Y.	2022	Excluded
301	MicroRNAs Regulate TASK-1 and Are Linked to Myocardial Dilatation in Atrial Fibrillation	Wiedmann F, Kraft M, Kallenberger S, Büscher A, Paasche A, Blochberger PL, Seeger T, Jávorszky N, Warnecke G, Arif R, Kremer J, Karck M, Frey N, Schmidt C.	2022	Excluded
302	Changes in microRNA Expression Profiles in Diabetic Cardiomyopathy Rats Following H3 Relaxin Treatment	Zhang X, Liu M, Yang K, Chi J, Chen W, Shi Z, Liu W, Ma X, Yin X.	2022	Excluded
303	Targeted deletion of Dicer in the heart leads to dilated cardiomyopathy and heart failure	Chen JF, Murchison EP, Tang R, Callis TE, Tatsuguchi M, Deng Z, Rojas M, Hammond SM, Schneider MD, Selzman CH, Meissner G, Patterson C, Hannon GJ, Wang DZ.	2008	Excluded
304	Lipophilic Chemicals from Diesel Exhaust Particles Trigger Calcium Response in Human Endothelial Cells via Aryl Hydrocarbon Receptor Non-Genomic Signalling	Brinchmann BC, Le Ferrec E, Podechard N, Lagadic-Gossmann D, Shoji KF, Penna A, Kukowski K, Kubátová A, Holme JA, Øvrevik J.	2018	Excluded
305	Targeted DNA Methylation Profiling of Human Cardiac Tissue Reveals Novel Epigenetic Traits and Gene Deregulation Across Different Heart Failure Patient Subtypes	Glezeva N, Moran B, Collier P, Moravec CS, Phelan D, Donnellan E, Russell-Hallinan A, O'Connor DP, Gallagher WM, Gallagher J, McDonald K, Ledwidge M, Baugh J, Das S, Watson CJ.	2019	PASS	PASS
306	miRNA expression in the failing human heart: functional correlates	Sucharov C, Bristow MR, Port JD.	2008	Excluded
307	MiR-207 inhibits autophagy and promotes apoptosis of cardiomyocytes by directly targeting LAMP2 in type 2 diabetic cardiomyopathy	Xing R, Liu D, Cheng X, Tian X, Yan C, Han Y.	2019	Excluded
308	Identification of gene signatures regulated by carvedilol in mouse heart	Teoh JP, Park KM, Broskova Z, Jimenez FR, Bayoumi AS, Archer K, Su H, Johnson J, Weintraub NL, Tang Y, Kim IM.	2015	Excluded
309	Macrophage microRNA-155 promotes cardiac hypertrophy and failure	Heymans S, Corsten MF, Verhesen W, Carai P, van Leeuwen RE, Custers K, Peters T, Hazebroek M, Stöger L, Wijnands E, Janssen BJ, Creemers EE, Pinto YM, Grimm D, Schürmann N, Vigorito E, Thum T, Stassen F, Yin X, Mayr M, de Windt LJ, Lutgens E, Wouters K, de Winther MP, Zacchigna S, Giacca M, van Bilsen M, Papageorgiou AP, Schroen B.	2013	Excluded
310	miR-30c Mediates Upregulation of Cdc42 and Pak1 in Diabetic Cardiomyopathy	Raut SK, Kumar A, Singh GB, Nahar U, Sharma V, Mittal A, Sharma R, Khullar M.	2015	Excluded
311	Right into the heart of microRNA-133a	Meder B, Katus HA, Rottbauer W.	2008	Excluded
313	Pivotal role of miR-448 in the development of ROS-induced cardiomyopathy	Kyrychenko S, Kyrychenko V, Badr MA, Ikeda Y, Sadoshima J, Shirokova N.	2015	Excluded
314	Inhibition of miR-186-5p contributes to high glucose-induced injury in AC16 cardiomyocytes	Jiang J, Mo H, Liu C, Wu B, Wu Z, Li X, Li T, He S, Li S, You Q, Wu K, Guo R.	2018	Excluded
315	Knockdown of NEAT1 induces tolerogenic phenotype in dendritic cells by inhibiting activation of NLRP3 inflammasome	Zhang M, Zheng Y, Sun Y, Li S, Chen L, Jin X, Hou X, Liu X, Chen Q, Li J, Liu M, Zheng X, Zhang Y, Wu J, Yu B.	2019	Excluded
316	MicroRNA-24 regulates cardiac fibrosis after myocardial infarction	Wang J, Huang W, Xu R, Nie Y, Cao X, Meng J, Xu X, Hu S, Zheng Z.	2012	Excluded
318	Microarray analysis reveals altered circulating microRNA expression in mice infected with Coxsackievirus B3	Sun C, Tong L, Zhao W, Wang Y, Meng Y, Lin L, Liu B, Zhai Y, Zhong Z, Li X.	2016	Excluded
319	Analysis of miRNAs Involved in Mouse Heart Injury Upon Coxsackievirus A2 Infection	Wu Z, Zhu S, Qian J, Hu Y, Ji W, Li D, Zhu P, Liang R, Jin Y.	2022	Excluded
320	Mitochondrial DNA in idiopathic cardiomyopathy	Turner LF, Kaddoura S, Harrington D, Cooper JM, Poole-Wilson PA, Schapira AH.	1998	Excluded
321	Swainsonine protects H9c2 cells against lipopolysaccharide-induced apoptosis and inflammatory injury via down-regulating miR-429	Lv H, Zhang S, Hao X.	2020	Excluded
322	ADAR1p150 Forms a Complex with Dicer to Promote miRNA-222 Activity and Regulate PTEN Expression in CVB3-Induced Viral Myocarditis	Zhang X, Gao X, Hu J, Xie Y, Zuo Y, Xu H, Zhu S.	2019	Excluded
323	Long-term miR-669a therapy alleviates chronic dilated cardiomyopathy in dystrophic mice	Quattrocelli M, Crippa S, Montecchiani C, Camps J, Cornaglia AI, Boldrin L, Morgan J, Calligaro A, Casasco A, Orlacchio A, Gijsbers R, D'Hooge J, Toelen J, Janssens S, Sampaolesi M.	2013	Excluded
324	Astragalus Root dry extract restores connexin43 expression by targeting miR-1 in viral myocarditis	Wang Y, Li J, Xuan L, Liu Y, Shao L, Ge H, Gu J, Wei C, Zhao M.	2018	Excluded
325	Long noncoding RNA LINC00339 aggravates doxorubicin-induced cardiomyocyte apoptosis by targeting MiR-484	Li J, Li L, Li X, Wu S.	2018	Excluded
326	Dilated cardiomyopathy: a new insight into the rare but common cause of heart failure	Giri P, Mukhopadhyay A, Gupta M, Mohapatra B.	2022	Excluded
327	Up-regulation of microRNA-203 inhibits myocardial fibrosis and oxidative stress in mice with diabetic cardiomyopathy through the inhibition of PI3K/Akt signaling pathway via PIK3CA	Yang X, Li X, Lin Q, Xu Q.	2019	Excluded
328	MiR-1-3p that correlates with left ventricular function of HCM can serve as a potential target and differentiate HCM from DCM	Li M, Chen X, Chen L, Chen K, Zhou J, Song J.	2018	PASS	Improper diagnosis
329	Inhibition of microRNA-155 ameliorates experimental autoimmune myocarditis by modulating Th17/Treg immune response	Yan L, Hu F, Yan X, Wei Y, Ma W, Wang Y, Lu S, Wang Z.	2016	Excluded
330	The year in heart failure	Tang WH, Francis GS.	2010	Excluded
331	MiR-223-3p affects myocardial inflammation and apoptosis following myocardial infarction via targeting FBXW7	Zhang L, Yang J, Guo M, Hao M.	2022	Excluded
332	MicroRNA-338-3p as a therapeutic target in cardiac fibrosis through FGFR2 suppression	Huang C, Wang R, Lu J, He Y, Wu Y, Ma W, Xu J, Wu Z, Feng Z, Wu M.	2022	Excluded
333	Detection of apoptosis using in situ markers for DNA strand breaks in the failing human heart. Fact or epiphenomenon?	Hughes SE.	2003	Excluded
334	Ultrastructural uncoupling between T-tubules and sarcoplasmic reticulum in human heart failure	Zhang HB, Li RC, Xu M, Xu SM, Lai YS, Wu HD, Xie XJ, Gao W, Ye H, Zhang YY, Meng X, Wang SQ.	2013	PASS	PASS
335	MiR-146a down-regulates inflammatory response by targeting TLR3 and TRAF6 in Coxsackievirus B infection	Fei Y, Chaulagain A, Wang T, Chen Y, Liu J, Yi M, Wang Y, Huang Y, Lin L, Chen S, Xu W, Tong L, Wu X, Zhao D, Zhang F, Zhao W, Zhong Z.	2020	Excluded
336	LncRNA HOTAIR functions as a competing endogenous RNA to upregulate SIRT1 by sponging miR-34a in diabetic cardiomyopathy	Gao L, Wang X, Guo S, Xiao L, Liang C, Wang Z, Li Y, Liu Y, Yao R, Liu Y, Zhang Y.	2019	Excluded
337	Cleavage of serum response factor mediated by enteroviral protease 2A contributes to impaired cardiac function	Wong J, Zhang J, Yanagawa B, Luo Z, Yang X, Chang J, McManus B, Luo H.	2012	Excluded
338	MicroRNA-203 enhances coxsackievirus B3 replication through targeting zinc finger protein-148	Hemida MG, Ye X, Zhang HM, Hanson PJ, Liu Z, McManus BM, Yang D.	2013	Excluded
339	Association of single nucleotide polymorphisms in the 3'UTR region of TPM1 gene with dilated cardiomyopathy: A case-control study	Yao Q, Zhang W, Zhang T.	2019	PASS	Improper diagnosis
340	Transcriptomic Signatures of End-Stage Human Dilated Cardiomyopathy Hearts with and without Left Ventricular Assist Device Support	Parikh M, Shah S, Basu R, Famulski KS, Kim D, Mullen JC, Halloran PF, Oudit GY.	2022	PASS	No control group
341	Exploring the Communal Pathogenesis, Ferroptosis Mechanism, and Potential Therapeutic Targets of Dilated Cardiomyopathy and Hypertrophic Cardiomyopathy via a Microarray Data Analysis	Wang Z, Xia Q, Su W, Cao M, Sun Y, Zhang M, Chen W, Jiang T.	2022	Excluded
342	Integration of miRNA and gene expression profiles suggest a role for miRNAs in the pathobiological processes of acute Trypanosoma cruzi infection	Ferreira LRP, Ferreira FM, Laugier L, Cabantous S, Navarro IC, da Silva Cândido D, Rigaud VC, Real JM, Pereira GV, Pereira IR, Ruivo L, Pandey RP, Savoia M, Kalil J, Lannes-Vieira J, Nakaya H, Chevillard C, Cunha-Neto E.	2017	Excluded
343	Silence of lncRNA CHRF protects H9c2 cells against lipopolysaccharide-induced injury via up-regulating microRNA-221	Zhang L, Wang L, Guo E, Qi Y.	2019	Excluded
344	Microarray profiling analysis identifies the mechanism of miR-200b-3p/mRNA-CD36 affecting diabetic cardiomyopathy via peroxisome proliferator activated receptor-γ signaling pathway	Xu L, Chen W, Ma M, Chen A, Tang C, Zhang C, Cai L.	2019	Excluded
345	Liver X receptor α is targeted by microRNA-1 to inhibit cardiomyocyte apoptosis through a ROS-mediated mitochondrial pathway	Cheng Y, Zhang D, Zhu M, Wang Y, Guo S, Xu B, Hou G, Feng Y, Liu G.	2018	Excluded
346	Inhibition of microRNA-138 enhances bone formation in multiple myeloma bone marrow niche	Tsukamoto S, Løvendorf MB, Park J, Salem KZ, Reagan MR, Manier S, Zavidij O, Rahmat M, Huynh D, Takagi S, Kawano Y, Kokubun K, Thrue CA, Nagano K, Petri A, Roccaro AM, Capelletti M, Baron R, Kauppinen S, Ghobrial IM.	2018	Excluded
347	MicroRNA- 1 represses Cx43 expression in viral myocarditis	Xu HF, Ding YJ, Shen YW, Xue AM, Xu HM, Luo CL, Li BX, Liu YL, Zhao ZQ.	2012	Excluded
349	Genetic Variants and Outcomes in Nonischemic Dilated Cardiomyopathy: The Role of miRNAs	Patanè S.	2022	Excluded
350	MiR-223/Pknox1 axis protects mice from CVB3-induced viral myocarditis by modulating macrophage polarization	Gou W, Zhang Z, Yang C, Li Y.	2018	Excluded
351	Natural history of dilated cardiomyopathy due to lamin A/C gene mutations	Taylor MR, Fain PR, Sinagra G, Robinson ML, Robertson AD, Carniel E, Di Lenarda A, Bohlmeyer TJ, Ferguson DA, Brodsky GL, Boucek MM, Lascor J, Moss AC, Li WL, Stetler GL, Muntoni F, Bristow MR, Mestroni L; Familial Dilated Cardiomyopathy Registry Research Group.	2003	Excluded
352	Serum Exosomal MiR-92b-5p as a Potential Biomarker for Acute Heart Failure Caused by Dilated Cardiomyopathy	Wu T, Chen Y, Du Y, Tao J, Zhou Z, Yang Z.	2018	PASS	PASS
353	MicroRNA based treatment of cardiomyopathy: not all dystrophies are created equal	Rodino-Klapac LR.	2013	Excluded
354	miR669a and miR669q prevent skeletal muscle differentiation in postnatal cardiac progenitors	Crippa S, Cassano M, Messina G, Galli D, Galvez BG, Curk T, Altomare C, Ronzoni F, Toelen J, Gijsbers R, Debyser Z, Janssens S, Zupan B, Zaza A, Cossu G, Sampaolesi M.	2011	Excluded
355	Parasite induced genetically driven autoimmune Chagas heart disease in the chicken model	Teixeira AR, Nitz N, Bernal FM, Hecht MM.	2012	Excluded
356	MicroRNA‑186‑5p is expressed highly in ethanol‑induced cardiomyocytes and regulates apoptosis via the target gene XIAP	Liu Y, Yu B.	2019	Excluded
357	Knockdown of long noncoding RNA GAS5 protects human cardiomyocyte-like AC16 cells against high glucose-induced inflammation by inhibiting miR-21-5p-mediated TLR4/NF-κB signaling	Zhao J, Liu B, Li C.	2020	Excluded
359	MiR-29a regulates cardiomyocyte apoptosis by targeting Bak1 in diabetic cardiomyopathy	Wang X, Zhang Z, Wang M.	2022	Excluded
360	Corrigendum: Reconstruction and Analysis of the lncRNA-miRNA-mRNA Network Based on Competitive Endogenous RNA Reveal Functional lncRNAs in Dilated Cardiomyopathy	Tao L, Yang L, Huang X, Hua F, Yang X.	2022	Excluded
361	Integrative bioinformatics analysis of potential therapeutic targets and immune infiltration characteristics in dilated cardiomyopathy	Yang Y, Liu P, Teng R, Liu F, Zhang C, Lu X, Ding Y.	2022	Excluded
362	[Full - transcriptome analysis of miRNA expression in mononuclear cells in patients with acute decompensation of chronic heart failure of various etiologies]	Zhirov IV, Baulina NM, Nasonova SN, Osmak GZ, Matveyeva NA, Mindzaev DR, Favorova OO, Tereshchenko SN.	2019	Excluded
363	Coxsackievirus B3 engineered to contain microRNA targets for muscle-specific microRNAs displays attenuated cardiotropic virulence in mice	He F, Yao H, Wang J, Xiao Z, Xin L, Liu Z, Ma X, Sun J, Jin Q, Liu Z.	2015	Excluded
364	Long noncoding RNA TDRG1 aggravates doxorubicin-induced cardiomyopathy by binding with miR-873-5p to upregulate PRKAR2	Liu Y, Tan L, Zhang M, Yang C.	2022	Excluded
365	miR-590-3p Is a Novel MicroRNA in Myocarditis by Targeting Nuclear Factor Kappa-B in vivo	Zhao S, Yang G, Liu PN, Deng YY, Zhao Z, Sun T, Zhuo XZ, Liu JH, Tian Y, Zhou J, Yuan Z, Wu Y.	2015	Excluded
366	Disrupting the key circadian regulator CLOCK leads to age-dependent cardiovascular disease	Alibhai FJ, LaMarre J, Reitz CJ, Tsimakouridze EV, Kroetsch JT, Bolz SS, Shulman A, Steinberg S, Burris TP, Oudit GY, Martino TA.	2017	Excluded
367	MicroRNA-130a Regulation of Desmocollin 2 in a Novel Model of Arrhythmogenic Cardiomyopathy	Mazurek SR, Calway T, Harmon C, Farrell P, Kim GH.	2017	Excluded
368	Circular RNA circSnx5 Controls Immunogenicity of Dendritic Cells through the miR-544/SOCS1 Axis and PU.1 Activity Regulation	Chen Q, Mang G, Wu J, Sun P, Li T, Zhang H, Wang N, Tong Z, Wang W, Zheng Y, Tian J, E M, Zhang M, Yu B.	2020	Excluded
369	MicroRNAs regulate the pathogenesis of CVB3-induced viral myocarditis	Zhang Q, Xiao Z, He F, Zou J, Wu S, Liu Z.	2013	Excluded
370	Loading of an anti-cancer drug into mesoporous silica nano-channels and its subsequent release to DNA	Koninti RK, Palvai S, Satpathi S, Basu S, Hazra P.	2016	Excluded
371	Loss of emerin alters myogenic signaling and miRNA expression in mouse myogenic progenitors	Koch AJ, Holaska JM.	2012	Excluded
372	Identification of critical genes and molecular pathways in COVID-19 myocarditis and constructing gene regulatory networks by bioinformatic analysis	Zhang F, Yu C, Xu W, Li X, Feng J, Shi H, Yang J, Sun Q, Cao X, Zhang L, Peng M.	2022	Excluded
373	MicroRNAs miR-1, miR-133a, miR-133b, miR-208a and miR-208b are dysregulated in Chronic Chagas disease Cardiomyopathy	Ferreira LR, Frade AF, Santos RH, Teixeira PC, Baron MA, Navarro IC, Benvenuti LA, Fiorelli AI, Bocchi EA, Stolf NA, Chevillard C, Kalil J, Cunha-Neto E.	2014	Excluded
374	lncRNA AK085865 Promotes Macrophage M2 Polarization in CVB3-Induced VM by Regulating ILF2-ILF3 Complex-Mediated miRNA-192 Biogenesis	Zhang Y, Li X, Wang C, Zhang M, Yang H, Lv K.	2020	Excluded
375	Ranolazine Inhibits Pyroptosis via Regulation of miR-135b in the Treatment of Diabetic Cardiac Fibrosis	Ren L, Chen X, Nie B, Qu H, Ju J, Bai Y.	2022	Excluded
376	Mitochondrial damage and activation of the cytosolic DNA sensor cGAS-STING pathway lead to cardiac pyroptosis and hypertrophy in diabetic cardiomyopathy mice	Yan M, Li Y, Luo Q, Zeng W, Shao X, Li L, Wang Q, Wang D, Zhang Y, Diao H, Rong X, Bai Y, Guo J.	2022	Excluded
377	LncRNA SOX2OT facilitates LPS-induced inflammatory injury by regulating intercellular adhesion molecule 1 (ICAM1) via sponging miR-215-5p	Zhu W, Peng F, Cui X, Li J, Sun C.	2022	Excluded
378	Activation of apoptotic signalling events in human embryonic stem cells upon Coxsackievirus B3 infection	Romorini L, Scassa ME, Videla Richardson G, Blüguermann C, Jaquenod de Giusti C, Questa M, Fernandez Espinosa DD, Gómez RM, Sevlever GE, Miriuka SG.	2012	Excluded
379	Gadd45α: a novel diabetes-associated gene potentially linking diabetic cardiomyopathy and baroreflex dysfunction	Wang N, Yang C, Xie F, Sun L, Su X, Wang Y, Wei R, Zhang R, Li X, Yang B, Ai J.	2012	Excluded
380	Endomyocardial miR-133a levels correlate with myocardial inflammation, improved left ventricular function, and clinical outcome in patients with inflammatory cardiomyopathy	Besler C, Urban D, Watzka S, Lang D, Rommel KP, Kandolf R, Klingel K, Thiele H, Linke A, Schuler G, Adams V, Lurz P.	2016	PASS	PASS
381	Argonaute proteins in cardiac tissue contribute to the heart injury during viral myocarditis	Sun S, Ma J, Zhang Q, Wang Q, Zhou L, Bai F, Hu H, Chang P, Yu J, Gao B.	2016	Excluded
382	Common genetic polymorphisms in pre-microRNAs were associated with increased risk of dilated cardiomyopathy	Zhou B, Rao L, Peng Y, Wang Y, Chen Y, Song Y, Zhang L.	2010	Excluded
383	Oxidative stress indices in gastroenteritis in dogs with canine parvoviral infection	Panda D, Patra RC, Nandi S, Swarup D.	2009	Excluded
384	Genotoxicity of airborne particulate matter: the role of cell-particle interaction and of substances with adduct-forming and oxidizing capacity	Karlsson HL, Nygren J, Möller L.	2004	Excluded
385	p53-mediated miR-18 repression activates HSF2 for IGF-IIR-dependent myocyte hypertrophy in hypertension-induced heart failure	Huang CY, Pai PY, Kuo CH, Ho TJ, Lin JY, Lin DY, Tsai FJ, Padma VV, Kuo WW, Huang CY.	2017	Excluded
386	Altered microRNA expression in human heart disease	Ikeda S, Kong SW, Lu J, Bisping E, Zhang H, Allen PD, Golub TR, Pieske B, Pu WT.	2007	PASS	PASS
387	Cardiovascular dysregulation of miR-17-92 causes a lethal hypertrophic cardiomyopathy and arrhythmogenesis	Danielson LS, Park DS, Rotllan N, Chamorro-Jorganes A, Guijarro MV, Fernandez-Hernando C, Fishman GI, Phoon CK, Hernando E.	2013	Excluded
388	Upregulated microRNA-214 enhances cardiac injury by targeting ITCH during coxsackievirus infection	Chen ZG, Liu H, Zhang JB, Zhang SL, Zhao LH, Liang WQ.	2015	PASS	PASS
389	The Long Noncoding RNA MALAT1 Induces Tolerogenic Dendritic Cells and Regulatory T Cells via miR155/Dendritic Cell-Specific Intercellular Adhesion Molecule-3 Grabbing Nonintegrin/IL10 Axis	Wu J, Zhang H, Zheng Y, Jin X, Liu M, Li S, Zhao Q, Liu X, Wang Y, Shi M, Zhang S, Tian J, Sun Y, Zhang M, Yu B.	2018	Excluded
390	Immune system-mediated atherosclerosis caused by deficiency of long non-coding RNA MALAT1 in ApoE-/-mice	Gast M, Rauch BH, Nakagawa S, Haghikia A, Jasina A, Haas J, Nath N, Jensen L, Stroux A, Böhm A, Friebel J, Rauch U, Skurk C, Blankenberg S, Zeller T, Prasanth KV, Meder B, Kuss A, Landmesser U, Poller W.	2019	Excluded
391	microRNA-133a regulates cardiomyocyte proliferation and suppresses smooth muscle gene expression in the heart	Liu N, Bezprozvannaya S, Williams AH, Qi X, Richardson JA, Bassel-Duby R, Olson EN.	2008	Excluded
392	Gold nanoparticle-based miR155 antagonist macrophage delivery restores the cardiac function in ovariectomized diabetic mouse model	Jia C, Chen H, Wei M, Chen X, Zhang Y, Cao L, Yuan P, Wang F, Yang G, Ma J.	2017	Excluded
393	Functional and transcriptomic insights into pathogenesis of R9C phospholamban mutation using human induced pluripotent stem cell-derived cardiomyocytes	Ceholski DK, Turnbull IC, Kong CW, Koplev S, Mayourian J, Gorski PA, Stillitano F, Skodras AA, Nonnenmacher M, Cohen N, Björkegren JLM, Stroik DR, Cornea RL, Thomas DD, Li RA, Costa KD, Hajjar RJ.	2018	Excluded
394	Cardiac hypertrophy and dysfunction induced by overexpression of miR-214 in vivo	Yang T, Gu H, Chen X, Fu S, Wang C, Xu H, Feng Q, Ni Y.	2014	Excluded
395	STAT4 silencing underlies a novel inhibitory role of microRNA-141-3p in inflammation response of mice with experimental autoimmune myocarditis	Pan A, Tan Y, Wang Z, Xu G.	2019	Excluded
396	miRNA as activity markers in Parvo B19 associated heart disease	Kühl U, Rohde M, Lassner D, Gross UM, Escher F, Schultheiss HP.	2012	PASS	No data
397	CircularRNA circ_0071269 knockdown protects against from diabetic cardiomyopathy injury by microRNA-145/gasdermin A axis	Fu L, Zhang J, Lin Z, Li Y, Qin G.	2022	Excluded
398	Relations between circulating microRNAs (miR-21, miR-26, miR-29, miR-30 and miR-133a), extracellular matrix fibrosis and serum markers of fibrosis in dilated cardiomyopathy	Rubiś P, Totoń-Żurańska J, Wiśniowska-Śmiałek S, Holcman K, Kołton-Wróż M, Wołkow P, Wypasek E, Natorska J, Rudnicka-Sosin L, Pawlak A, Kozanecki A, Podolec P.	2017	PASS	No control group
399	MiR-10a* up-regulates coxsackievirus B3 biosynthesis by targeting the 3D-coding sequence	Tong L, Lin L, Wu S, Guo Z, Wang T, Qin Y, Wang R, Zhong X, Wu X, Wang Y, Luan T, Wang Q, Li Y, Chen X, Zhang F, Zhao W, Zhong Z.	2013	Excluded
400	Circulating Levels of MicroRNAs in Hypertrophic Cardiomyopathy: The Relationship With Left Ventricular Hypertrophy, Left Atrial Dilatation and Ventricular Depolarisation-Repolarisation Parameters	Sonsöz MR, Yilmaz M, Cevik E, Orta H, Bilge AK, Elitok A, Onur I, Komurcu-Bayrak E.	2022	Excluded
401	Sex differences in response to miRNA-34a therapy in mouse models of cardiac disease: identification of sex-, disease- and treatment-regulated miRNAs	Bernardo BC, Ooi JY, Matsumoto A, Tham YK, Singla S, Kiriazis H, Patterson NL, Sadoshima J, Obad S, Lin RC, McMullen JR.	2016	Excluded
402	Biological Functions and Clinical Prospects of Extracellular Non-Coding RNAs in Diabetic Cardiomyopathy: an Updated Review	Yin Z, Chen C.	2022	Excluded
403	Immune checkpoint inhibitor induces cardiac injury through polarizing macrophages via modulating microRNA-34a/Kruppel-like factor 4 signaling	Xia W, Zou C, Chen H, Xie C, Hou M.	2020	Excluded
404	Coxsackievirus B infection induces the extracellular release of miR-590-5p, a proviral microRNA	Germano JF, Sawaged S, Saadaeijahromi H, Andres AM, Feuer R, Gottlieb RA, Sin J.	2019	Excluded
405	Systems analysis reveals down-regulation of a network of pro-survival miRNAs drives the apoptotic response in dilated cardiomyopathy	Isserlin R, Merico D, Wang D, Vuckovic D, Bousette N, Gramolini AO, Bader GD, Emili A.	2015	Excluded
406	Enhanced Suppression of Disulfide Cross-Linking Micelles Nanocarriers Loaded miR-145 Delivering System via Down-Regulation of MYC and FSCN1 in Colon Cancer Cells	Zhai J, Zhu Y, Liu J, An J, Yu Y, Li Y, Fan Y.	2020	Excluded
407	DNA vaccines encoding the envelope protein of West Nile virus lineages 1 or 2 administered intramuscularly, via electroporation and with recombinant virus protein induce partial protection in large falcons (Falco spp.)	Fischer D, Angenvoort J, Ziegler U, Fast C, Maier K, Chabierski S, Eiden M, Ulbert S, Groschup MH, Lierz M.	2015	Excluded
408	Diversity of Microbial Eukaryotes Along the West Antarctic Peninsula in Austral Spring	Grattepanche JD, Jeffrey WH, Gast RJ, Sanders RW.	2022	Excluded
409	PGC-1alpha and ERRalpha target gene downregulation is a signature of the failing human heart	Sihag S, Cresci S, Li AY, Sucharov CC, Lehman JJ.	2009	Excluded
410	LncEGFL7OS regulates human angiogenesis by interacting with MAX at the EGFL7/miR-126 locus	Zhou Q, Yu B, Anderson C, Huang ZP, Hanus J, Zhang W, Han Y, Bhattacharjee PS, Srinivasan S, Zhang K, Wang DZ, Wang S.	2019	Excluded
411	Clinical characteristics and outcome of biopsy-proven myocarditis in children - Results of the German prospective multicentre registry "MYKKE"	Seidel F, Opgen-Rhein B, Rentzsch A, Boehne M, Wannenmacher B, Boecker D, Reineker K, Grafmann M, Wiegand G, Hecht T, Kiski D, Fischer M, Papakostas K, Ruf B, Kramp J, Khalil M, Kaestner M, Steinmetz M, Fischer G, Özcan S, Freudenthal N, Schweigmann U, Hellwig R, Pickardt T, Klingel K, Messroghli D, Schubert S; MYKKE consortium.	2022	Excluded
412	MicroRNA-33 Controls Adaptive Fibrotic Response in the Remodeling Heart by Preserving Lipid Raft Cholesterol	Nishiga M, Horie T, Kuwabara Y, Nagao K, Baba O, Nakao T, Nishino T, Hakuno D, Nakashima Y, Nishi H, Nakazeki F, Ide Y, Koyama S, Kimura M, Hanada R, Nakamura T, Inada T, Hasegawa K, Conway SJ, Kita T, Kimura T, Ono K.	2017	PASS	No control group
413	Exosomal microRNAs: potential targets for the prevention and treatment of diabetic cardiomyopathy	Zhang T, Gao Z, Chen K.	2022	Excluded
414	[Investigation on the differentially expressed circular RNAs in myocardium of mice with diabetic cardiomyopathy]	Wu XG, Zhang SC, Zhou X.	2022	Excluded
415	miR-30a-5p inhibits the proliferation and collagen formation of cardiac fibroblasts in diabetic cardiomyopathy	Yang XX, Zhao ZY.	2022	Excluded
416	Bioinformatics analysis for identifying micro-RNAs, long noncoding RNAs, transcription factors, and immune genes regulatory networks in diabetic cardiomyopathy using an integrated bioinformatics analysis	Zhou J, Ji X, Zhang F, Yan K, Huang P, Huang C.	2022	Excluded
417	MicroRNA-223-3p promotes pyroptosis of cardiomyocyte and release of inflammasome factors via downregulating the expression level of SPI1 (PU.1)	Zhao S, Tan Y, Qin J, Xu H, Liu L, Wan H, Zhang C, Fan W, Qu S.	2022	Excluded
418	Analysis of microRNA expression profiles during the differentiation of chicken embryonic stem cells into male germ cells	Li X, Jin H, Lv Y, Liu C, Luo X, Liu J, Zhang Q, Yu Y, Zhao Z.	2022	Excluded
419	A Novel Clinical Score for Differential Diagnosis Between Acute Myocarditis and Acute Coronary Syndrome - The SAlzburg MYocarditis (SAMY) Score	Mirna M, Schmutzler L, Topf A, Sipos B, Hehenwarter L, Hoppe UC, Lichtenauer M.	2022	Excluded
420	TWIST1 regulates the activity of ubiquitin proteasome system via the miR-199/214 cluster in human end-stage dilated cardiomyopathy	Baumgarten A, Bang C, Tschirner A, Engelmann A, Adams V, von Haehling S, Doehner W, Pregla R, Anker MS, Blecharz K, Meyer R, Hetzer R, Anker SD, Thum T, Springer J.	2013	PASS	PASS
421	Let-7i: lethal weapon against angiotensin ii-induced cardiac injury	Syed M, Ball JP, Romero DG.	2015	Excluded
422	Characterization of Circular RNA Expression Profiles in Colon Specimens of Patients with Slow Transit Constipation	Xi C, Hong Y, Chen B, Xie X, Liu W, Qian Q, Jiang C, Ren X.	2022	Excluded
423	Targeted delivery of mutant tolerant anti-coxsackievirus artificial microRNAs using folate conjugated bacteriophage Phi29 pRNA	Ye X, Liu Z, Hemida MG, Yang D.	2011	Excluded
424	The mechanism of miR-142-3p in coronary microembolization-induced myocardiac injury via regulating target gene IRAK-1	Su Q, Lv X, Ye Z, Sun Y, Kong B, Qin Z, Li L.	2019	Excluded
425	Expression of the peptide hormone hepcidin increases in cardiomyocytes under myocarditis and myocardial infarction	Isoda M, Hanawa H, Watanabe R, Yoshida T, Toba K, Yoshida K, Kojima M, Otaki K, Hao K, Ding L, Tanaka K, Takayama T, Kato K, Okura Y, Kodama M, Ota Y, Hayashi J, Aizawa Y.	2010	Excluded
426	Biological Sex and Its Impact on Clinical Characteristics in Patients Presenting with Myocarditis	Mirna M, Schmutzler L, Topf A, Hoppe UC, Lichtenauer M.	2022	Excluded
427	Effects of artemisinin on ventricular arrhythmias in response to left ventricular afterload increase and microRNA expression profiles in Wistar rats	Xu X, Zhang Q, Song H, Ao Z, Li X, Cheng C, Shi M, Fu F, Sun C, Liu Y, Han D.	2018	Excluded
428	MicroRNA-150 protects the mouse heart from ischaemic injury by regulating cell death	Tang Y, Wang Y, Park KM, Hu Q, Teoh JP, Broskova Z, Ranganathan P, Jayakumar C, Li J, Su H, Tang Y, Ramesh G, Kim IM.	2015	Excluded
429	lncRNA H19/miR-675 axis regulates cardiomyocyte apoptosis by targeting VDAC1 in diabetic cardiomyopathy	Li X, Wang H, Yao B, Xu W, Chen J, Zhou X.	2016	Excluded
430	Long non-coding RNA MEG3 serves as a ceRNA for microRNA-145 to induce apoptosis of AC16 cardiomyocytes under high glucose condition	Chen Y, Zhang Z, Zhu D, Zhao W, Li F.	2019	Excluded
431	AT1 receptor blocker azilsartan medoxomil normalizes plasma miR-146a and miR-342-3p in a murine heart failure model	Kaneko M, Satomi T, Fujiwara S, Uchiyama H, Kusumoto K, Nishimoto T.	2017	Excluded
432	Intracrine endothelin signaling evokes IP3-dependent increases in nucleoplasmic Ca²⁺ in adult cardiac myocytes	Merlen C, Farhat N, Luo X, Chatenet D, Tadevosyan A, Villeneuve LR, Gillis MA, Nattel S, Thorin E, Fournier A, Allen BG.	2013	Excluded
433	Androgen receptor regulates cardiac fibrosis in mice with experimental autoimmune myocarditis by increasing microRNA-125b expression	Wang Y, Ma W, Lu S, Yan L, Hu F, Wang Z, Cheng B.	2018	Excluded
434	MiR-126 promotes coxsackievirus replication by mediating cross-talk of ERK1/2 and Wnt/β-catenin signal pathways	Ye X, Hemida MG, Qiu Y, Hanson PJ, Zhang HM, Yang D.	2013	Excluded
436	Peax: interactive visual analysis and exploration of complex clinical phenotype and gene expression association	Hinterberg MA, Kao DP, Bristow MR, Hunter LE, Port JD, Görg C.	2015	Excluded
437	lncRNA MIAT functions as a competing endogenous RNA to upregulate DAPK2 by sponging miR-22-3p in diabetic cardiomyopathy	Zhou X, Zhang W, Jin M, Chen J, Xu W, Kong X.	2017	Excluded
438	POLRMT regulates the switch between replication primer formation and gene expression of mammalian mtDNA	Kühl I, Miranda M, Posse V, Milenkovic D, Mourier A, Siira SJ, Bonekamp NA, Neumann U, Filipovska A, Polosa PL, Gustafsson CM, Larsson NG.	2016	Excluded
439	A role of pre-mir-10a coding region variant in host susceptibility to coxsackie virus-induced myocarditis	Liao Y, Chen KH, Dong XM, Fang Y, Li WG, Huang GY, Song W.	2015	PASS	Not miRNA/cfDNA
440	Engineered coxsackievirus B3 containing multiple organ-specific miRNA targets showed attenuated viral tropism and protective immunity	Xiao Z, He F, Feng M, Liu Z, Liu Z, Li S, Wang W, Yao H, Wu J.	2022	Excluded
441	Inhibitory effect of microRNA-27b on interleukin 17 (IL-17)-induced monocyte chemoattractant protein-1 (MCP1) expression	Huang KD, Shen Y, Wei X, Zhang FQ, Liu YY, Ma L.	2016	Excluded
442	A carvedilol-responsive microRNA, miR-125b-5p protects the heart from acute myocardial infarction by repressing pro-apoptotic bak1 and klf13 in cardiomyocytes	Bayoumi AS, Park KM, Wang Y, Teoh JP, Aonuma T, Tang Y, Su H, Weintraub NL, Kim IM.	2018	Excluded
443	Targeting miR-423-5p Reverses Exercise Training-Induced HCN4 Channel Remodeling and Sinus Bradycardia	D'Souza A, Pearman CM, Wang Y, Nakao S, Logantha SJRJ, Cox C, Bennett H, Zhang Y, Johnsen AB, Linscheid N, Poulsen PC, Elliott J, Coulson J, McPhee J, Robertson A, da Costa Martins PA, Kitmitto A, Wisløff U, Cartwright EJ, Monfredi O, Lundby A, Dobrzynski H, Oceandy D, Morris GM, Boyett MR.	2017	Excluded
444	Rapid onset of cardiomyopathy in STZ-induced female diabetic mice involves the downregulation of pro-survival Pim-1	Moore A, Shindikar A, Fomison-Nurse I, Riu F, Munasinghe PE, Ram TP, Saxena P, Coffey S, Bunton RW, Galvin IF, Williams MJ, Emanueli C, Madeddu P, Katare R.	2014	Excluded
445	MicroRNA-146a provides feedback regulation of lyme arthritis but not carditis during infection with Borrelia burgdorferi	Lochhead RB, Ma Y, Zachary JF, Baltimore D, Zhao JL, Weis JH, O'Connell RM, Weis JJ.	2014	Excluded
446	Analysis of the Indicating Value of Cardiac Troponin I, Tumor Necrosis Factor-α, Interleukin-18, Mir-1 and Mir-146b for Viral Myocarditis among Children	Wang D, Li T, Cui H, Zhang Y.	2016	PASS	PASS
447	Intravenous gene therapy with PIM-1 via a cardiotropic viral vector halts the progression of diabetic cardiomyopathy through promotion of prosurvival signaling	Katare R, Caporali A, Zentilin L, Avolio E, Sala-Newby G, Oikawa A, Cesselli D, Beltrami AP, Giacca M, Emanueli C, Madeddu P.	2011	Excluded
448	MiR-155 and miR-148a reduce cardiac injury by inhibiting NF-κB pathway during acute viral myocarditis	Bao JL, Lin L.	2014	PASS	PASS
449	microRNA-340-5p Functions Downstream of Cardiotrophin-1 to Regulate Cardiac Eccentric Hypertrophy and Heart Failure via Target Gene Dystrophin	Zhou J, Gao J, Zhang X, Liu Y, Gu S, Zhang X, An X, Yan J, Xin Y, Su P.	2015	Excluded
450	A new player in the game: treatment with antagomiR-21a-5p significantly attenuates histological and echocardiographic effects of experimental autoimmune myocarditis	Mirna M, Paar V, Topf A, Kraus T, Sotlar K, Aigner A, Ewe A, Watzinger S, Podesser BK, Hackl M, Pistulli R, Hoppe UC, Kiss A, Lichtenauer M.	2022	Excluded
451	A novel neurological phenotype in mice lacking mitochondrial manganese superoxide dismutase	Melov S, Schneider JA, Day BJ, Hinerfeld D, Coskun P, Mirra SS, Crapo JD, Wallace DC.	1998	Excluded
452	Genotoxic effects and oxidative stress induced by organic extracts of particulate matter(PM 10)collected from a subway tunnel in Seoul, Korea	Jung MH, Kim HR, Park YJ, Park DS, Chung KH, Oh SM.	2012	Excluded
453	Targeted deletion of microRNA-22 promotes stress-induced cardiac dilation and contractile dysfunction	Gurha P, Abreu-Goodger C, Wang T, Ramirez MO, Drumond AL, van Dongen S, Chen Y, Bartonicek N, Enright AJ, Lee B, Kelm RJ Jr, Reddy AK, Taffet GE, Bradley A, Wehrens XH, Entman ML, Rodriguez A.	2012	Excluded
454	MicroRNA Transcriptome Profiling in Heart of Trypanosoma cruzi-Infected Mice: Parasitological and Cardiological Outcomes	Navarro IC, Ferreira FM, Nakaya HI, Baron MA, Vilar-Pereira G, Pereira IR, Silva AM, Real JM, De Brito T, Chevillard C, Lannes-Vieira J, Kalil J, Cunha-Neto E, Ferreira LR.	2015	Excluded
455	miR-503 Is Involved in the Protective Effect of Phase II Enzyme Inducer (CPDT) in Diabetic Cardiomyopathy via Nrf2/ARE Signaling Pathway	Miao Y, Wan Q, Liu X, Wang Y, Luo Y, Liu D, Lin N, Zhou H, Zhong J.	2017	Excluded
456	Reduced MMP-2 activity contributes to cardiac fibrosis in experimental diabetic cardiomyopathy	Van Linthout S, Seeland U, Riad A, Eckhardt O, Hohl M, Dhayat N, Richter U, Fischer JW, Böhm M, Pauschinger M, Schultheiss HP, Tschöpe C.	2008	Excluded
457	Serotonin is a novel survival factor of cardiomyocytes: mitochondria as a target of 5-HT2B receptor signaling	Nebigil CG, Etienne N, Messaddeq N, Maroteaux L.	2003	Excluded
458	Trypanosoma cruzi in the chicken model: Chagas-like heart disease in the absence of parasitism	Teixeira AR, Gomes C, Nitz N, Sousa AO, Alves RM, Guimaro MC, Cordeiro C, Bernal FM, Rosa AC, Hejnar J, Leonardecz E, Hecht MM.	2011	Excluded
459	Cytometric analysis of ventricular myocyte nuclei in idiopathic dilated cardiomyopathy: a tool for evaluation of disease progression?	Huhn KM, Palcic B, Wilson JE, McManus BM.	1995	Excluded
460	An SRF/miR-1 axis regulates NCX1 and annexin A5 protein levels in the normal and failing heart	Tritsch E, Mallat Y, Lefebvre F, Diguet N, Escoubet B, Blanc J, De Windt LJ, Catalucci D, Vandecasteele G, Li Z, Mericskay M.	2013	Excluded
461	RETRACTED: Silencing circANKRD36 protects H9c2 cells against lipopolysaccharide-induced injury via up-regulating miR-138	Shi S, Zhang S, Zhang H, Jin Q, Wu D.	2019	Excluded
462	Human herpesvirus 6-related fulminant myocarditis and hepatitis in an immunocompetent adult with fatal outcome	Chang YL, Parker ME, Nuovo G, Miller JB.	2009	Excluded
463	Unique microRNA profile in end-stage heart failure indicates alterations in specific cardiovascular signaling networks	Naga Prasad SV, Duan ZH, Gupta MK, Surampudi VS, Volinia S, Calin GA, Liu CG, Kotwal A, Moravec CS, Starling RC, Perez DM, Sen S, Wu Q, Plow EF, Croce CM, Karnik S.	2009	PASS	PASS
464	Extracellular vesicles enriched with an endothelial cell pro-survival microRNA affects skin tissue regeneration	Fernandes H, Zonnari A, Abreu R, Aday S, Barão M, Albino I, Lino M, Branco A, Seabra C, Barata T, Leal EC, Tralhão JG, Gonçalves L, de Jong A, Peters HAB, de Vries MR, da Costa Martins P, Quax PHA, Ferreira L.	2022	Excluded
465	Comparison of serum biomarkers of myocardial fibrosis with cardiac magnetic resonance in patients operated for tetralogy of Fallot	DiLorenzo MP, DeCost G, Mai AD, Hughes N, Goldmuntz E, Jones A, Fogel MA, Mercer-Rosa L.	2022	Excluded
466	Pol II-expressed shRNA knocks down Sod2 gene expression and causes phenotypes of the gene knockout in mice	Xia XG, Zhou H, Samper E, Melov S, Xu Z.	2006	Excluded
467	[Effect of creatine phosphate sodium on miRNA378, miRNA378(*) and calumenin mRNA in adriamycin-injured cardiomyocytes]	Miao YU, Zhi-Hui HE, Li-Ying X, Xiao-Tong S, Jie L, Jing-Yi F, Yu W, Ming Z.	2016	Excluded
468	Study on the expression and function of chordin-like 1 in oral squamous cell carcinoma	Han Y, Xia L, Wang X, Xiong H, Zeng L, Wang Z, Zhang T, Xia K, Hu X, Su T.	2022	Excluded
469	miR-16-5p Suppression Protects Human Cardiomyocytes against Endoplasmic Reticulum and Oxidative Stress-Induced Injury	Toro R, Pérez-Serra A, Mangas A, Campuzano O, Sarquella-Brugada G, Quezada-Feijoo M, Ramos M, Alcalá M, Carrera E, García-Padilla C, Franco D, Bonet F.	2022	Excluded
470	Novel Anti Double-Stranded Nucleic Acids Full-Length Recombinant Camelid Heavy-Chain Antibody for the Detection of miRNA	Czarnecka M, Weichelt U, Rödiger S, Hanack K.	2022	Excluded
471	[The relationship between miRNA378, calumenin and endoplasmic reticulum stress in suckling mouse myocardium with myocarditis caused by adriamycin]	Zhao M, Cui XX, Yu M, Wang YL, Long J, Zhao Q.	2016	Excluded
472	Antiviral activity of coxsackievirus B3 3C protease inhibitor in experimental murine myocarditis	Yun SH, Lee WG, Kim YC, Ju ES, Lim BK, Choi JO, Kim DK, Jeon ES.	2012	Excluded
473	MCI-186 (edaravone), a novel free radical scavenger, protects against acute autoimmune myocarditis in rats	Nimata M, Okabe TA, Hattori M, Yuan Z, Shioji K, Kishimoto C.	2005	Excluded
474	A generic and non-enzymatic electrochemical biosensor integrated molecular beacon-like catalyzed hairpin assembly circuit with MOF@Au@G-triplex/hemin nanozyme for ultrasensitive detection of miR-721	Li Y, Zhang C, He Y, Gao J, Li W, Cheng L, Sun F, Xia P, Wang Q.	2022	Excluded
475	Molecular evidence of stress-induced acute heart injury in a mouse model simulating posttraumatic stress disorder	Cho JH, Lee I, Hammamieh R, Wang K, Baxter D, Scherler K, Etheridge A, Kulchenko A, Gautam A, Muhie S, Chakraborty N, Galas DJ, Jett M, Hood L.	2014	Excluded
476	Mitochondrial DNA mutations in myocardial diseases	Ozawa T.	1995	Excluded
477	Altered microRNA expression associated with reduced catecholamine sensitivity in patients with chronic heart failure	Funahashi H, Izawa H, Hirashiki A, Cheng XW, Inden Y, Nomura M, Murohara T.	2011	PASS	No control group
478	Multi-therapeutic strategy targeting parasite and inflammation-related alterations to improve prognosis of chronic Chagas cardiomyopathy: a hypothesis-based approach	Lannes-Vieira J.	2022	Excluded
479	Lipoprotein lipase (LpL) on the surface of cardiomyocytes increases lipid uptake and produces a cardiomyopathy	Yagyu H, Chen G, Yokoyama M, Hirata K, Augustus A, Kako Y, Seo T, Hu Y, Lutz EP, Merkel M, Bensadoun A, Homma S, Goldberg IJ.	2003	Excluded
480	The oxygen free radical system: a fundamental mechanism in the production of myocardial necrosis	Thompson JA, Hess ML.	1986	Excluded
481	Discovering Common Pathophysiological Processes between COVID-19 and Cystic Fibrosis by Differential Gene Expression Pattern Analysis	Hasan MT, Abdulrazak LF, Alam MK, Islam MR, Sathi YH, Al-Zahrani FA, Ahmed K, Bui FM, Moni MA.	2022	Excluded
482	Treatment with Non-Steroidal Anti-Inflammatory Drugs (NSAIDs) Does Not Affect Outcome in Patients with Acute Myocarditis or Myopericarditis	Mirna M, Schmutzler L, Topf A, Boxhammer E, Sipos B, Hoppe UC, Lichtenauer M.	2022	Excluded
483	Intercellular transfer of miR-200c-3p impairs the angiogenic capacity of cardiac endothelial cells	Ottaviani L, Juni RP, de Abreu RC, Sansonetti M, Sampaio-Pinto V, Halkein J, Hegenbarth JC, Ring N, Knoops K, Kocken JMM, Jesus C, Ernault AC, El Azzouzi H, Rühle F, Olieslagers S, Fernandes H, Ferreira L, Braga L, Stoll M, Nascimento DS, de Windt LJ, da Costa Martins PA.	2022	Excluded
484	Changes in regulatory microRNA expression in myocardium of heart failure patients on left ventricular assist device support	Schipper ME, van Kuik J, de Jonge N, Dullens HF, de Weger RA.	2008	Excluded
485	Histopathologic and molecular profile of human cytomegalovirus infections in patients with heart transplants	Arbustini E, Grasso M, Diegoli M, Percivalle E, Grossi P, Bramerio M, Campana C, Goggi C, Gavazzi A, Vigano M.	1992	Excluded
486	The circRNA circSIAE Inhibits Replication of Coxsackie Virus B3 by Targeting miR-331-3p and Thousand and One Amino-Acid Kinase 2	Yang Q, Li Y, Wang Y, Qiao X, Liu T, Wang H, Shen H.	2022	Excluded
487	RETRACTED: LncRNA MALAT1 regulates sepsis-induced cardiac inflammation and dysfunction via interaction with miR-125b and p38 MAPK/NFκB	Chen H, Wang X, Yan X, Cheng X, He X, Zheng W.	2018	Excluded
489	Intranuclear paracrystals observed in striated muscle specific LIM protein-deficient mouse cardiomyocytes	Muto M, Sargeant A, Tangkawattana P, Takeyasu K, Nishijima Y, Bonagura J, Hoshijima M, Nakade T, Hosaka Y, Faulkner G, Tomono K, Yamaguchi M.	2007	Excluded
490	[Does the analysis of DNA in myocytes have meaning?]	Luciani M, Rocco M, Pizzolitto S, Antoci B.	1991	Excluded
491	Resolving a catch-22 in cardiac gene regulation	Dorn GW 2nd.	2012	Excluded
493	Revealing the underlying mechanism of diabetic nephropathy viewed by microarray analysis	Qu W, Han C, Li M, Zhang J, Li L.	2015	Excluded
494	Downregulation of microRNA-1 attenuates glucose-induced apoptosis by regulating the liver X receptor α in cardiomyocytes	Cheng Y, Zhao W, Zhang X, Sun L, Yang H, Wang Y, Cao Y, Chu Y, Liu G.	2018	Excluded
495	From Streptococcal Pharyngitis/Tonsillitis to Myocarditis: A Systematic Review	Schmutzler L, Mirna M, Hoppe UC, Lichtenauer M.	2022	Excluded
496	Redox Imbalance and Methylation Disturbances in Early Childhood Obesity	Barbosa P, Melnyk S, Bennuri SC, Delhey L, Reis A, Moura GR, Børsheim E, Rose S, Carvalho E.	2021	Excluded
497	Buthionine sulfoximine, an inhibitor of glutathione biosynthesis, induces expression of soluble epoxide hydrolase and markers of cellular hypertrophy in a rat cardiomyoblast cell line: roles of the NF-κB and MAPK signaling pathways	Abdelhamid G, El-Kadi AO.	2015	Excluded
498	Exercise alleviates cardiac remodelling in diabetic cardiomyopathy via the miR-486a-5p-Mst1 pathway	Sun D, Wang H, Su Y, Lin J, Zhang M, Man W, Song X, Zhang L, Guo B, Hao K, Sun D.	2021	Excluded
499	Vildagliptin Attenuates Myocardial Dysfunction and Restores Autophagy via miR-21/SPRY1/ERK in Diabetic Mice Heart	Li X, Meng C, Han F, Yang J, Wang J, Zhu Y, Cui X, Zuo M, Xu J, Chang B.	2021	Excluded
500	Poly(rC) binding protein 1 benefits coxsackievirus B3 infection via suppressing the translation of p62/SQSTM1	He HY, You Z, Ouyang T, Zhao G, Chen LJ, Wang Q, Li JY, Ye X, Zhang MH, Yang D, Ge XY, Qiu Y.	2022	Excluded
508	CXCR4 and TYROBP mediate the development of atrial fibrillation via inflammation	Zhang Y.-F., Meng L.-B., Hao M.-L., Li X.-Y., Zou T.	2022	Excluded
510	LncRNA Rian reduces cardiomyocyte pyroptosis and alleviates myocardial ischemia–reperfusion injury by regulating by the miR-17-5p/CCND1 axis	Kang H., Yu H., Zeng L., Ma H., Cao G.	2022	Excluded
512	Investigation on the differentially expressed circular RNAs in myocardium of mice with diabetic cardiomyopathy	Wu X.G., Zhang S.C., Zhou X.	2022	Excluded
516	Cardiovascular toxic effects of antitumor agents: Pathogenetic mechanisms	Pantazi D., Tselepis A.D.	2022	Excluded
517	Persistent Enterovirus Infection: Little Deletions, Long Infections	Chapman N.M.	2022	Excluded
518	The Regulatory Role of miR-21 in Coronary Microcirculation	Juguilon C., Wang Y., Wang Z., Enrick M., Gadd J., Clark A., Chilian W., Yin L.	2022	Excluded
519	Implication of New identified Nicotine regulated genes in diabetic cardiomyopathy	Wang Y., Zhao J., Zhao J., Xie Y., Liu C., Lau W.B., Lopez B., Christopher T., Ma X.	2022	Excluded
521	The Role of E3 Ligase Pirh2 in Disease	Daks A., Fedorova O., Parfenyev S., Nevzorov I., Shuvalov O., Barlev N.A.	2022	Excluded
526	CVD and COVID-19: Emerging Roles of Cardiac Fibroblasts and Myofibroblasts	Katwa L.C., Mendoza C., Clements M.	2022	Excluded
527	Temporal Associations between Immunization with the COVID-19 mRNA Vaccines and Myocarditis	Keith J.S., McDonough M.M., Dimitrakoff J.D.	2022	Excluded
528	Anti-inflammatory effects of bitongling granules are mediated through the suppression of miR-21/p38 MAPK/TLR4/NF-κB signaling in H9C2 rat cardiac cells exposed to lipopolysaccharides	Cao Y.-X., Huang D., Lin R., Zong R.-K., Huang C.-B., Wang Y., Liu J.	2022	Excluded
529	A critical review of Astragalus polysaccharides: From therapeutic mechanisms to pharmaceutics	Du Y., Wan H., Huang P., Yang J., He Y.	2022	Excluded
530	Targeted therapies in genetic dilated and hypertrophic cardiomyopathies: from molecular mechanisms to therapeutic targets. A position paper from the Heart Failure Association (HFA) and the Working Group on Myocardial Function of the European Society of Cardiology (ESC)	de Boer R.A., Heymans S., Backs J., Carrier L., Coats A.J.S., Dimmeler S., Eschenhagen T., Filippatos G., Gepstein L., Hulot J.-S., Knöll R., Kupatt C., Linke W.A., Seidman C.E., Tocchetti C.G., van der Velden J., Walsh R., Seferovic P.M., Thum T.	2022	Excluded
531	G3bp1 – microRNA-1 axis regulates cardiomyocyte hypertrophy	Alikunju S., Niranjan N., Mohsin M., Sayed N., Sayed D.	2022	Excluded
532	Fibroblast-mediated intercellular crosstalk in the healthy and diseased heart	Nicin L., Wagner J.U.G., Luxán G., Dimmeler S.	2022	Excluded
534	Avian Reoviruses From Wild Birds Exhibit Pathogenicity to Specific Pathogen Free Chickens by Footpad Route	Choi Y.-R., Kim S.-W., Shang K., Park J.-Y., Zhang J.-F., Jang H.-K., Wei B., Cha S.-Y., Kang M.	2022	Excluded
536	Expression and Significance of Circulating microRNA-29b in Adult Fulminant Myocarditis	Chen J.-H., He J., Zhou R., Zheng N.	2022	PASS	Duplicate
537	The Swine IFN System in Viral Infections: Major Advances and Translational Prospects	Razzuoli E., Armando F., De Paolis L., Ciurkiewicz M., Amadori M.	2022	Excluded
541	RNA-Seq Analysis of the Key Long Noncoding RNAs and mRNAs Related to the Regulation of Acute Heat Stress in Rainbow Trout	Zhou C.-Q., Ka W., Zhang H.-J., Li Y.-L., Gao P., Long R.-J., Yang S.-W., Wang J.-L.	2022	Excluded
542	“LONG COVID”—A hypothesis for understanding the biological basis and pharmacological treatment strategy	Jarrott B., Head R., Pringle K.G., Lumbers E.R., Martin J.H.	2022	Excluded
543	New insights into the role of melatonin in diabetic cardiomyopathy	Huang K., Luo X., Zhong Y., Deng L., Feng J.	2022	Excluded
544	Identification of a Novel Theranostic Signature of Metabolic and Immune-Inflammatory Dysregulation in Myocardial Infarction, and the Potential Therapeutic Properties of Ovatodiolide, a Diterpenoid Derivative	Wu A.T.H., Lawal B., Tzeng Y.-M., Shih C.-C., Shih C.-M.	2022	Excluded
549	Identifying changes in immune cells and constructing prognostic models using immune-related genes in post-burn immunosuppression	Wang P., Zhang Z., Yin B., Li J., Xialin C., Lian W., Su Y., Jia C.	2022	Excluded
552	LncRNA SNHG15 Modulates Ischemia-Reperfusion Injury in Human AC16 Cardiomyocytes Depending on the Regulation of the miR-335-3p/TLR4/NF-κB Pathway	Du H., Ding L., Zeng T., Li D., Liu L.	2022	Excluded
556	Twelve-month kinetics of circulating fibrosis-linked microRNAs (miR-21, miR-29, miR-30, and miR-133a) and the relationship with extracellular matrix fibrosis in dilated cardiomyopathy	Rubiś P., Totoń-Żurańska J., Kołton-Wróż M., Wołkow P., Pitera E., Wiśniowska-Śmiałek S., Dziewięcka E., Garlitski A., Podolec P.	2022	PASS	No data
557	MiR-197 Participates in Lipopolysaccharide-Induced Cardiomyocyte Injury by Modulating SIRT1	Liu M., Zhang Y., Cao X., Shi T., Yan Y.	2022	Excluded
558	Transcriptome sequencing and lncRNA-miRNA-mRNA network construction in cardiac fibrosis and heart failure	Wang S., Lv T., Chen Q., Yang Y., Xu L., Zhang X., Wang E., Hu X., Liu Y.	2022	Excluded
562	Cardiac Manifestations of Systemic Lupus Erythematous: An Overview of the Incidence, Risk Factors, Diagnostic Criteria, Pathophysiology and Treatment Options	Zagelbaum Ward N.K., Linares-Koloffon C., Posligua A., Gandrabur L., Kim W.Y., Sperber K., Wasserman A., Ash J.	2022	Excluded
564	Sex-related factors in cardiovascular complications associated to covid-19	Megiorni F., Pontecorvi P., Gerini G., Anastasiadou E., Marchese C., Ceccarelli S.	2022	Excluded
565	miR-223: An Immune Regulator in Infectious Disorders	Yuan S., Wu Q., Wang Z., Che Y., Zheng S., Chen Y., Zhong X., Shi F.	2021	Excluded
566	Liquid biopsy to identify biomarkers for immunotherapy in hepatocellular carcinoma	Ao H., Xin Z., Jian Z.	2021	Excluded
567	Genetic correction strategies for Duchenne muscular dystrophy and their impact on the heart	Johnston J.R., McNally E.M.	2021	Excluded
568	Impact of the main cardiovascular risk factors on plasma extracellular vesicles and their influence on the heart’s vulnerability to ischemia-reperfusion injury	Majka M., Kleibert M., Wojciechowska M.	2021	Excluded
573	Subcutaneous envafolimab monotherapy in patients with advanced defective mismatch repair/microsatellite instability high solid tumors	Li J., Deng Y., Zhang W., Zhou A.-P., Guo W., Yang J., Yuan Y., Zhu L., Qin S., Xiang S., Lu H., Gong J., Xu T., Liu D., Shen L.	2021	Excluded
577	A double-edged sword of immuno-microenvironment in cardiac homeostasis and injury repair	Sun K., Li Y.-Y., Jin J.	2021	Excluded
579	Immunomodulation for the Treatment of Chronic Chagas Disease Cardiomyopathy: A New Approach to an Old Enemy	Santos E.D.S., Silva D.K.C., Reis B.P.Z.C.D., Barreto B.C., Cardoso C.M.A., Ribeiro dos Santos R., Meira C.S., Soares M.B.P.	2021	Excluded
581	An update on the roles of immune system-derived microRNAs in cardiovascular diseases	Roberts L.B., Kapoor P., Howard J.K., Shah A.M., Lord G.M.	2021	Excluded
582	A review on the evolving roles of mirna-based technologies in diagnosing and treating heart failure	Kennel P.J., Christian Schulze P.	2021	Excluded
583	Inherited and acquired rhythm disturbances in sick sinus syndrome, brugada syndrome, and atrial fibrillation: Lessons from preclinical modeling	Iop L., Iliceto S., Civieri G., Tona F.	2021	Excluded
584	MicroRNA-Based Diagnostics in Heart Diseases: Current Limitations and Future Perspectives	Düsing P., Zietzer A., Jansen F.	2021	Excluded
586	Inhibition of the long non-coding RNA ZFAS1 attenuates ferroptosis by sponging miR-150-5p and activates CCND2 against diabetic cardiomyopathy	Ni T., Huang X., Pan S., Lu Z.	2021	Excluded
587	Clinical Features and Prognostic Factors of Children with Chronic Active Epstein-Barr Virus Infection: A Retrospective Analysis of a Single Center	Chen S., Wei A., Ma H., Zhang L., Lian H., Zhao Y., Zhang Q., Cheng F., Wang D., Wang T., Li Z., Zhang R.	2021	Excluded
588	Matters of the heart: Cellular sex differences	Walker C.J., Schroeder M.E., Aguado B.A., Anseth K.S., Leinwand L.A.	2021	Excluded
591	Noninvasive diagnosis of myocarditis with microRNA [Nichtinvasive Diagnostik der Myokarditis mit Mikro-RNA]	[No author name available]	2021	Excluded
592	Directions for enhancement of the therapeutic efficacy of mesenchymal stem cells in different neurodegenerative and cardiovascular diseases: Current status and future perspectives	Ahmed L.A., Al-Massri K.F.	2021	Excluded
593	Atrial cardiomyopathy: Pathophysiology and clinical consequences	Goette A., Lendeckel U.	2021	Excluded
595	MALAT1 shuttled by extracellular vesicles promotes M1 polarization of macrophages to induce acute pancreatitis via miR-181a-5p/HMGB1 axis	Liu J., Niu Z., Zhang R., Peng Z., Wang L., Liu Z., Gao Y., Pei H., Pan L.	2021	Excluded
596	Cell therapy for nonischemic dilated cardiomyopathy: A systematic review and meta-analysis of randomized controlled trials	Tripathi A., Khan M.S., Khan A.R., Vaughn V.M., Bolli R.	2021	Excluded
599	Arrhythmogenic cardiomyopathy: The ongoing search for mechanism-driven therapies meets extracellular vesicles	Basso C., Zaglia T., Pilichou K.	2021	Excluded
604	Promising biomarker for the early, non-invasive diagnosis of myocarditis	Fernández-Ruiz I.	2021	Excluded
606	miR-16 induces endoplasmic reticulum stress in ischemic dilated cardiomyopathy [Los niveles de miR-16 inducen estrés de retículo en la cardiomiopatía dilatada isquémica]	Sánchez-Esteban S., Zaragoza C., Saura M.	2021	Excluded
607	Erratum regarding missing declaration of competing interest statements in previously published articles (Gene Reports (2020) 19, (S2452014420300455), (10.1016/j.genrep.2020.100631))	[No author name available]	2021	Excluded
608	Ischemic dilated cardiomyopathy pathophysiology through microRNA-16-5p [Fisiopatología de la miocardiopatía dilatada isquémica a través del microRNA-16-5p]	Calderon-Dominguez M., Mangas A., Belmonte T., Quezada-Feijoo M., Ramos M., Toro R.	2021	PASS	Improper diagnosis
609	Extracellular matrix–based biomaterials for cardiac regeneration and repair	Li H., Bao M., Nie Y.	2021	Excluded
611	Emerging microRNA biomarkers for acute kidney injury in acute decompensated heart failure	Templeton E.M., Cameron V.A., Pickering J.W., Richards A.M., Pilbrow A.P.	2021	Excluded
612	Expression Profiles and Potential Functions of Long Non-Coding RNAs in the Heart of Mice With Coxsackie B3 Virus-Induced Myocarditis	Nie X., Li H., Wang J., Cai Y., Fan J., Dai B., Chen C., Wang D.W.	2021	Excluded
614	Challenges of current anticancer treatment approaches with focus on liposomal drug delivery systems	Gyanani V., Haley J.C., Goswami R.	2021	Excluded
616	Characteristics of Rickettsia typhi Infections Detected with Next-Generation Sequencing of Microbial Cell-Free Deoxyribonucleic Acid in a Tertiary Care Hospital	Centeno F.H., Lasco T., Ahmed A.A., Al Mohajer M.	2021	Excluded
618	Bone marrow-derived SH-SY5Y neuroblastoma cells infected with Kaposi's sarcoma-associated herpesvirus display unique infection phenotypes and growth properties	Kong X., Li D., Mansouri A., Kang G., Sayood K., West J., Wood C.	2021	Excluded
620	Well-known and novel serum biomarkers for risk stratification of patients with non-ischemic dilated cardiomyopathy	Anghel L., Sascău R., Zota I.M., Stătescu C.	2021	Excluded
621	microRNA-454-mediated NEDD4-2/TrkA/cAMP axis in heart failure: Mechanisms and cardioprotective implications	Wang Y., Pan W., Bai X., Wang X., Wang Y., Yin Y.	2021	Excluded
623	Circular RNAs in childhood-related diseases and cancers: A review	Mao L., Guo J., Hu L., Li L., Bennett S., Xu J., Zou J.	2021	Excluded
624	Rheumatic immune-related adverse events induced by immune checkpoint inhibitors	Zhong H., Zhou J., Xu D., Zeng X.	2021	Excluded
628	Identification and Functional Prediction of Long Non-Coding RNAs in Dilated Cardiomyopathy by Bioinformatics Analysis	Chen Y.-X., Ding J., Zhou W.-E., Zhang X., Sun X.-T., Wang X.-Y., Zhang C., Li N., Shao G.-F., Hu S.-J., Yang J.	2021	PASS	Not miRNA/cfDNA
633	lncRNA-MALAT1 promotes high glucose-induced H9C2 cardiomyocyte pyroptosis by downregulating miR-141-3p expression	Wu A., Sun W., Mou F.	2021	Excluded
636	Gene Expression Analysis Suggests Immunological Changes of Peripheral Blood Monocytes in the Progression of Patients With Coronary Artery Disease	Wang C., Song C., Liu Q., Zhang R., Fu R., Wang H., Yin D., Song W., Zhang H., Dou K.	2021	Excluded
637	Essential role of non‐coding rnas in enterovirus infection: From basic mechanisms to clinical prospects	Zhu P., Chen S., Zhang W., Duan G., Jin Y.	2021	Excluded
640	Efficacy, Safety, and Correlative Biomarkers of Toripalimab in Previously Treated Recurrent or Metastatic Nasopharyngeal Carcinoma: A Phase II Clinical Trial (POLARIS-02)	Wang F.-H., Wei X.-L., Feng J., Li Q., Xu N., Hu X.-C., Liao W., Jiang Y., Lin X.-Y., Zhang Q.-Y., Yuan X.-L., Huang H.-X., Chen Y., Dai G.-H., Shi J.-H., Shen L., Yang S.-J., Shu Y.-Q., Liu Y.-P., Wang W., Wu H., Feng H., Yao S., Xu R.-H.	2021	Excluded
643	Mechanism of long non-coding RNA metastasis-associated lung adenocarcinoma transcript 1 in lipid metabolism and inflammation in heart failure	ZHAO P., WANG Y., ZHANG L., ZHANG J., LIU N., WANG H.	2021	Excluded
647	Editor-in-Chief's Top Picks From 2020	Fuster V.	2021	Excluded
649	Iron derived from autophagy-mediated ferritin degradation induces cardiomyocyte death and heart failure in mice	Ito J., Omiya S., Rusu M.-C., Ueda H., Murakawa T., Tanada Y., Abe H., Nakahara K., Asahi M., Taneike M., Nishida K., Shah A.M., Otsu K.	2021	Excluded
650	A changing paradigm in heart transplantation: An integrative approach for invasive and non-invasive allograft rejection monitoring	Giarraputo A., Barison I., Fedrigo M., Burrello J., Castellani C., Tona F., Bottio T., Gerosa G., Barile L., Angelini A.	2021	Excluded
655	CD14 (C-159T) polymorphism is associated with increased susceptibility to SLE, and plasma levels of soluble CD14 is a novel biomarker of disease activity: A hospital-based case-control study	Panda A.K., Tripathy R., Das B.K.	2021	Excluded
656	Metformin: A Novel Weapon Against Inflammation	Bai B., Chen H.	2021	Excluded
659	Machine learning-guided phenotyping of dilated cardiomyopathy and treatment of heart failure by antisense oligonucleotides: The future has begun	Crea F.	2021	Excluded
660	The multiple potential biomarkers for predicting immunotherapy response-finding the needle in the haystack	Adam T., Becker T.M., Chua W., Bray V., Roberts T.L.	2021	Excluded
667	Bone Marrow Mesenchymal Stem Cell-Derived Exosomal MicroRNA-133a Restrains Myocardial Fibrosis and Epithelial–Mesenchymal Transition in Viral Myocarditis Rats Through Suppressing MAML1	Li Q., Jin Y., Ye X., Wang W., Deng G., Zhang X.	2021	Excluded
668	Genetics and epigenetics of nasal polyposis: A systematic review	Martin M.J., Garcia-Sanchez A., Estravis M., Gil-Melcón M., Isidoro-Garcia M., Sanz C., Davila I.	2021	Excluded
669	Integrated analysis of miRNA–mRNA interaction in pediatric dilated cardiomyopathy	Hailu F.T., Karimpour-Fard A., Toni L.S., Bristow M.R., Miyamoto S.D., Stauffer B.L., Sucharov C.C.	2021	PASS	PASS
670	Identification and characterization of non-coding RNAs in thymoma	Ji G., Ren R., Fang X.	2021	Excluded
671	Inhibiting glucose metabolism by mir-34a and mir-125b protects against hyperglycemia-induced cardiomyocyte cell death [A inibição do metabolismo da glicose por mir-34a e mir-125b protege contra a morte celular de cardiomiócitos causada por hiperglicemia]	Xu C.-R., Fang Q.-J.	2021	Excluded
672	Efficacy and side effects of immune checkpoint inhibitors in the treatment of colorectal cancer	Manz S.M., Losa M., Fritsch R., Scharl M.	2021	Excluded
673	Recurrent myocarditis induced by immune-checkpoint inhibitor treatment is accompanied by persistent inflammatory markers despite immunosuppressive treatment	Aghel N., Gustafson D., Di Meo A., Music M., Prassas I., Seidman M.A., Hansen A.R., Thavendiranathan P., Diamandis E.P., Delgado D., Fish J.E.	2021	Excluded
674	Bioinformatics-Based Identification of lncRNA-miRNA-mRNA Network in Dilated Cardiomyopathy and Drug Prediction	Liu W., Cai J., Tang M., Yang Q.	2021	PASS	Public dataset analysis
675	Potential target genes in the development of atrial fibrillation: A comprehensive bioinformatics analysis	Liu L., Yu Y., Hu L.-L., Dong Q.-B., Hu F., Zhu L.-J., Liang Q., Yu L.-L., Bao H.-H., Cheng X.-S.	2021	Excluded
676	Go red for women strategically focused research network: Summary of findings and network outcomes	St-Onge M.-P., Aggarwal B., Allison M.A., Berger J.S., Castañeda S.F., Catov J., Hochman J.S., Hubel C.A., Jelic S., Kass D.A., Makarem N., Michos E.D., Mosca L., Ouyang P., Park C., Post W.S., Powers R.W., Reynolds H.R., Sears D.D., Shah S.J., Sharma K., Spruill T., Talavera G.A., Vaidya D.	2021	Excluded
677	Current and Future Perspectives of PD-1/PDL-1 Blockade in Cancer Immunotherapy	Makuku R., Khalili N., Razi S., Keshavarz-Fathi M., Rezaei N.	2021	Excluded
679	Expression levels of miR-146b and anti-cardiac troponin i in serum of children with viral myocarditis and their clinical significance	Yan M., Wang J., Wang S., Zhang Y., Liu L., Zhao H.	2021	PASS	PASS
680	Assessment and Management of Cardiotoxicity in Hematologic Malignancies	Bojan A., Torok-Vistai T., Parvu A.	2021	Excluded
681	Recognize yourself—innate sensing of non-ltr retrotransposons	Lagisquet J., Zuber K., Gramberg T.	2021	Excluded
682	Current status and perspectives of immune checkpoint inhibitors for colorectal cancer	Hirano H., Takashima A., Hamaguchi T., Shida D., Kanemitsu Y.	2021	Excluded
683	Promising novel therapies for relapsed and refractory testicular germ cell tumors	Kozakova K., Mego M., Cheng L., Chovanec M.	2021	Excluded
686	Targeting the pathways of regulated necrosis: a potential strategy for alleviation of cardio-cerebrovascular injury	Lu L.-Q., Tian J., Luo X.-J., Peng J.	2021	Excluded
689	Identification of Hub Prognosis-Associated Oxidative Stress Genes in Pancreatic Cancer Using Integrated Bioinformatics Analysis	Qiu X., Hou Q.-H., Shi Q.-Y., Jiang H.-X., Qin S.-Y.	2020	Excluded
690	Circulating Exosomes Control CD4+ T Cell Immunometabolic Functions via the Transfer of miR-142 as a Novel Mediator in Myocarditis	Sun P., Wang N., Zhao P., Wang C., Li H., Chen Q., Mang G., Wang W., Fang S., Du G., Zhang M., Tian J.	2020	Excluded
692	Integrative metabolomics to identify molecular signatures of responses to vaccines and infections	Diray-Arce J., Conti M.G., Petrova B., Kanarek N., Angelidou A., Levy O.	2020	Excluded
694	Harnessing noncoding RNA-based macrophage polarization: Emerging therapeutic opportunities for fibrosis	Zhou D., Wu Y., Wang S., Li J., Luan J.	2020	Excluded
695	Current situation and future of stem cells in cardiovascular medicine	Nasser M.I., Qi X., Zhu S., He Y., Zhao M., Guo H., Zhu P.	2020	Excluded
697	Assessing severity of cardiac sarcoid: Is SUV the answer?	Montalto S., Better N.	2020	Excluded
698	The Cell Type–Specific Functions of miR-21 in Cardiovascular Diseases	Dai B., Wang F., Nie X., Du H., Zhao Y., Yin Z., Li H., Fan J., Wen Z., Wang D.W., Chen C.	2020	Excluded
701	Persistence of viral RNA, pneumocyte syncytia and thrombosis are hallmarks of advanced COVID-19 pathology	Bussani R., Schneider E., Zentilin L., Collesi C., Ali H., Braga L., Volpe M.C., Colliva A., Zanconati F., Berlot G., Silvestri F., Zacchigna S., Giacca M.	2020	Excluded
702	Nlrp3 inflammasome biomarker—could be the new tool for improved cardiometabolic syndrome outcome	Suceveanu A.-I., Mazilu L., Katsiki N., Parepa I., Voinea F., Pantea-Stoian A., Rizzo M., Botea F., Herlea V., Serban D., Suceveanu A.-P.	2020	Excluded
704	Recent advances on the roles of LncRNAs in cardiovascular disease	Fang Y., Xu Y., Wang R., Hu L., Guo D., Xue F., Guo W., Zhang D., Hu J., Li Y., Zhang W., Zhang M.	2020	Excluded
705	A robust signature associated with patient prognosis and tumor immune microenvironment based on immune-related genes in lung squamous cell carcinoma	Zhou H., Zhang H., Shi M., Wang J., Huang Z., Shi J.	2020	Excluded
706	Echocardiography and biomarkers for the diagnosis of cardiotoxicity [Echokardiographie und Biomarker zur Diagnose der Kardiotoxizität]	Berliner D., Beutel G., Bauersachs J.	2020	Excluded
707	Silencing mirna210 aleviates myocardial cell damage in myocarditis by hypoxia inducible factor-vascular endothelial growth factor pathway	Li H., Yang Z., Gao F., Zhang R., Chai C.	2020	Excluded
709	miR-205/IRAK2 signaling pathway is associated with urban airborne PM2.5-induced myocardial toxicity	Feng L., Wei J., Liang S., Sun Z., Duan J.	2020	Excluded
710	Nivolumab Plus Ipilimumab for Metastatic Castration-Resistant Prostate Cancer: Preliminary Analysis of Patients in the CheckMate 650 Trial	Sharma P., Pachynski R.K., Narayan V., Fléchon A., Gravis G., Galsky M.D., Mahammedi H., Patnaik A., Subudhi S.K., Ciprotti M., Simsek B., Saci A., Hu Y., Han G.C., Fizazi K.	2020	Excluded
711	The pro-apoptosis and pro-inflammation role of LncRNA HIF1AAS1 in Coxsackievirus B3-induced myocarditis via targeting miR-138	Cao H., Yang B., Zhao Y., Deng X., Shen X.	2020	Excluded
714	Stimulating pro-reparative immune responses to prevent adverse cardiac remodelling: Consensus document from the joint 2019 meeting of the ESC working groups of cellular biology of the heart and myocardial function	Steffens S., van Linthout S., Sluijter J.P.G., Tocchetti C.G., Thum T., Madonna R.	2020	Excluded
715	MicroRNA-203–mediated inhibition of doublecortin underpins cardioprotection conferred by sevoflurane in rats after myocardial ischaemia-reperfusion injury	Tan J., Wu Z., Liu J., Zhang W., Yuan W., Peng H.	2020	Excluded
717	Expression profiling of circular RNAs and their potential role in early-stage diabetic cardiomyopathy	Dong S., Tu C., Ye X., Li L., Zhang M., Xue A., Chen S., Zhao Z., Cong B., Lin J., Shen Y.	2020	Excluded
719	Pro-inflammatory role of cell-free mitochondrial DNA in cardiovascular diseases	Nie S., Lu J., Wang L., Gao M.	2020	Excluded
721	Integrative Analysis of Membrane Proteome and MicroRNA Reveals Novel Lung Cancer Metastasis Biomarkers	Kong Y., Qiao Z., Ren Y., Genchev G.Z., Ge M., Xiao H., Zhao H., Lu H.	2020	Excluded
724	Dietary gluten and neurodegeneration: A case for preclinical studies	Mohan M., Okeoma C.M., Sestak K.	2020	Excluded
725	Evelopment of a newmouse model for coxsackievirus-inducedmyocarditis by attenuating coxsackievirus B3 virulence in the pancreas	Pinkert S., Pryshliak M., Pappritz K., Knoch K., Hazini A., Dieringer B., Schaar K., Dong F., Hinze L., Lin J., Lassner D., Klopfleisch R., Solimena M., Tschope C., Kaya Z., El-Shafeey M., Beling A., Kurreck J., Linthout S.V., Klinge K., Fechner H.	2020	Excluded
731	Diagnosis of dilated cardiomyopathy in children based on microRNA sequencing technology [基于微小RNA测序技术的儿童扩张型心肌病的诊断学研究]	Jiao M., You H., Wang Z., Gu Y., Wang X., Liang Y., Xiao Y., Jin M.	2020	PASS	PASS
734	Kawasaki disease: pathophysiology and insights from mouse models	Noval Rivas M., Arditi M.	2020	Excluded
735	Ischemic postconditioning attenuates the inflammatory response in ischemia/reperfusion myocardium by upregulating miR‑499 and inhibiting TLR2 activation	Zhang X.-Y., Huang Z., Li Q.-J., Zhong G.-Q., Meng J.-J., Wang D.-X., Tu R.-H.	2020	Excluded
737	Postconditioning with nitrates protects against myocardial reperfusion injury: A new use for an old pharmacological agent	Meng Z., Gai W., Song D.	2020	Excluded
738	Genetic factors involved in cardiomyopathies and in cancer	Sabater-Molina M., Navarro-Peñalver M., Muñoz-Esparza C., Esteban-Gil Á., Santos-Mateo J.J., Gimeno J.R.	2020	Excluded
739	The cardiac lipidome in models of cardiovascular disease	Tomczyk M.M., Dolinsky V.W.	2020	Excluded
740	Cardiovascular Research at the frontier of biomedical science	Brown S.K., Sheikh A.M., Guzik T.J.	2020	Excluded
743	OX40 and LAG3 are associated with better prognosis in advanced gastric cancer patients treated with anti-programmed death-1 antibody	Ohmura H., Yamaguchi K., Hanamura F., Ito M., Makiyama A., Uchino K., Shimokawa H., Tamura S., Esaki T., Mitsugi K., Shibata Y., Oda H., Tsuchihashi K., Ariyama H., Kusaba H., Oda Y., Akashi K., Baba E.	2020	Excluded
744	MicroRNAs in cardiovascular disease	Siasos G., Bletsa E., Stampouloglou P.K., Oikonomou E., Tsigkou V., Paschou S.A., Vlasis K., Marinos G., Vavuranakis M., Stefanadis C., Tousoulis D.	2020	Excluded
745	Autoimmunity in Acute Myocarditis: How Immunopathogenesis Steers New Directions for Diagnosis and Treatment	Bruestle K., Hackner K., Kreye G., Heidecker B.	2020	Excluded
746	LncRNA-MIAT-Mediated miR-214-3p Silencing Is Responsible for IL-17 Production and Cardiac Fibrosis in Diabetic Cardiomyopathy	Qi Y., Wu H., Mai C., Lin H., Shen J., Zhang X., Gao Y., Mao Y., Xie X.	2020	Excluded
752	MicroRNAs in cancer treatment-induced cardiotoxicity	Pellegrini L., Sileno S., D’agostino M., Foglio E., Florio M.C., Guzzanti V., Russo M.A., Limana F., Magenta A.	2020	Excluded
758	Challenges in using circulating micro-rnas as biomarkers for cardiovascular diseases	Felekkis K., Papaneophytou C.	2020	Excluded
759	Circulating microRNA as biomarkers of clozapine-induced cardiotoxicity	Burns K.E., Deane-Alder K.D., Bellissima B.L., Tingle M.D.	2020	Excluded
761	Adding adjuvants to fluoropyrimidine-based neoadjuvant chemoradiotherapy for locally advanced rectal cancer: an option worthy of serious consideration	Wu F., Zhou C., Wu B., Zhang X., Wang K., Wang J., Xiao L., Wang G.	2020	Excluded
763	Possible susceptibility genes for intervention against chemotherapy-induced cardiotoxicity	Yang X., Li G., Yang T., Guan M., An N., Yang F., Dai Q., Zhong C., Luo C., Gao Y., Das S., Xing Y., Shang H.	2020	Excluded
767	DHX36, BAX, and ARPC1B May Be Critical for the Diagnosis and Treatment of Tuberculosis	Zhang Y., Li Y., Li H., Liu Q., Wang W., Jian Z., Liu W.	2020	Excluded
768	Autophagy, myocarditis, and cardiomyopathy	Du J., Liu Y., Fu J.	2020	Excluded
770	MicroRNA-147 inhibits myocardial inflammation and apoptosis following myocardial infarction via targeting HIPK2	WU C.-G., HUANG C.	2020	Excluded
771	Focus on receptors for coronaviruses with special reference to angio-tensin-converting enzyme 2 as a potential drug target-a perspective	Magrone T., Magrone M., Jirillo E.	2020	Excluded
772	New Insights into the Human Brain's Cognitive Organization: Views from the Top, from the Bottom, from the Left and, particularly, from the Right	Velichkovsky B., Nedoluzhko A., Goldberg E., Efimova O., Sharko F., Rastorguev S., Krasivskaya A., Sharaev M., Korosteleva A., Ushakov V.	2020	Excluded
777	Selenomethionine alleviates LPS-induced chicken myocardial inflammation by regulating the miR-128-3p-p38 MAPK axis and oxidative stress	Liu J., Wang S., Zhang Q., Li X., Xu S.	2020	Excluded
780	MiR-215-5p inhibits the inflammation injury in septic H9c2 by regulating ILF3 and LRRFIP1	Yao Y., Xu K., Sun Y., Tian T., Shen W., Sun F., Yuan W., Wu H., Chen G., Yuan L., Zhang W., Lu M., Lei M.	2020	Excluded
786	Silencing circANKRD36 protects H9c2 cells against lipopolysaccharide-induced injury via up-regulating miR-138	Shi S., Zhang S., Zhang H., Jin Q., Wu D.	2019	Excluded
795	Autophagy and inflammasome activation in dilated cardiomyopathy	Caragnano A., Aleksova A., Bulfoni M., Cervellin C., Rolle I.G., Veneziano C., Barchiesi A., Mimmi M.C., Vascotto C., Finato N., Sponga S., Livi U., Isola M., Di Loreto C., Bussani R., Sinagra G., Cesselli D., Beltrami A.P.	2019	PASS	Improper diagnosis
797	Metabolic reprogramming orchestrates CD4+ T-cell immunological status and restores cardiac dysfunction in autoimmune induced-dilated cardiomyopathy mice	Wu J., Sun P., Chen Q., Sun Y., Shi M., Mang G., Yu S., Zheng Y., Li Z., Sun M., Fang S., Zhang Y., Tian J., Mingyan E., Zhang M., Yu B.	2019	Excluded
798	Catalpol attenuates cardiomyocyte apoptosis in diabetic cardiomyopathy via Neat1/miR-140–5p/HDAC4 axis	Zou G., Zhong W., Wu F., Wang X., Liu L.	2019	Excluded
799	Purification and Identification of miRNA Target Sites in Genome Using DNA Affinity Precipitation	Xun Y., Tang Y., Hu L., Xiao H., Long S., Gong M., Wei C., Wei K., Xiang S.	2019	Excluded
800	A Novel Circular RNA Mediates Pyroptosis of Diabetic Cardiomyopathy by Functioning as a Competing Endogenous RNA	Yang F., Li A., Qin Y., Che H., Wang Y., Lv J., Li Y., Li H., Yue E., Ding X., Yu Y., Bai Y., Wang L.	2019	Excluded
801	Degenerative cervical myelopathy; A review of the latest advances and future directions in management	Wilson J.R.F., Badhiwala J.H., Moghaddamjou A., Martin A.R., Fehlings M.G.	2019	Excluded
806	Nivolumab alone or in combination with cisplatin plus gemcitabine in Japanese patients with unresectable or recurrent biliary tract cancer: a non-randomised, multicentre, open-label, phase 1 study	Ueno M., Ikeda M., Morizane C., Kobayashi S., Ohno I., Kondo S., Okano N., Kimura K., Asada S., Namba Y., Okusaka T., Furuse J.	2019	Excluded
807	Bioinformatics Analysis of the Core Genes Related to Lupus Nephritis Through a Network and Pathway-Based Approach	Sun G., Zhu P., Dai Y., Chen W.	2019	Excluded
811	microRNA-26a-5p affects myocardial injury induced by coronary microembolization by modulating HMGA1	Kong B., Qin Z., Ye Z., Yang X., Li L., Su Q.	2019	Excluded
819	Extremely Low Organ Toxicity and Strong Antitumor Activity of miR-34-Regulated Oncolytic Coxsackievirus B3	Jia Y., Miyamoto S., Soda Y., Takishima Y., Sagara M., Liao J., Hirose L., Hijikata Y., Miura Y., Hara K., Iwanaga A., Ota Y., Tani K.	2019	Excluded
820	Diabetic cardiomyopathy: molecular mechanisms, detrimental effects of conventional treatment, and beneficial effects of natural therapy	Parim B., Sathibabu Uddandrao V.V., Saravanan G.	2019	Excluded
825	Genetic and non-genetic determinants of clinical phenotypes in cardiomyopathy	Nomura S.	2019	Excluded
828	Effects of a new compound containing Palmitoylethanolamide and Baicalein in myocardial ischaemia/reperfusion injury in vivo	D'amico R., Fusco R., Gugliandolo E., Cordaro M., Siracusa R., Impellizzeri D., Peritore A.F., Crupi R., Cuzzocrea S., Di Paola R.	2019	Excluded
829	The Exosome: a New Player in Diabetic Cardiomyopathy	Tao L., Shi J., Yang X., Yang L., Hua F.	2019	Excluded
830	Proceedings of the 3rd annual Acute Cardiac Unloading and REcovery (A-CURE) symposium	Chandrasekaran U., Burkhoff D., Ishikawa K., Swain L., Sunagawa K., Møller J., Santos-Gallego C., Annamalai S., Udelson J., Westenfeld R., Kapur N., Qiao X., Wiora J., Schäfer A., Bernhardt A., Kochar A., Kloner R., Faraz H.	2019	Excluded
834	Upregulated microRNA-132 rescues cardiac fibrosis and restores cardiocyte proliferation in dilated cardiomyopathy through the phosphatase and tensin homolog–mediated PI3K/Akt signal transduction pathway	Zhang C.-J., Huang Y., Lu J.-D., Lin J., Ge Z.-R., Huang H.	2019	Excluded
835	Peripartum cardiomyopathy	Honigberg M.C., Givertz M.M.	2019	Excluded
839	Airway and lung involvement in inflammatory bowel disease	Camus P., Colby T.V.	2019	Excluded
840	MicroRNAs in cardiovascular disease: Small molecules but big roles	Yan B., Wang H., Tan Y., Fu W.	2019	Excluded
842	Full-transcriptome analysis of miRNA expression in mononuclear cells in patients with acute decompensation of chronic heart failure of various etiologies [Полнотранскриптомный анализ экспрессии микроРНК в мононуклеарных клетках у пациентов с острой декомпенсацией хронической сердечной недостаточности различной этиологии]	Zhirov I.V., Baulina N.M., Nasonova S.N., Osmak G.Zh., Matveyeva N.A., Mindzaev D.R., Favorova O.O., Tereshchenko S.N.	2019	Excluded
843	Preventive role of resveratrol against inflammatory cytokines and related diseases	Rafe T., Shawon P.A., Salem L., Chowdhury N.I., Kabir F., Zahur S.M.B., Akhter R., Noor H.B., Mohib M.M., Sagor M.A.T.	2019	Excluded
846	Downregulation of MALAT1 alleviates saturated fatty acid-induced myocardial inflammatory injury via the miR-26a/HMGB1/TLR4/NF-κB axis	Jia P., Wu N., Jia D., Sun Y.	2019	Excluded
848	Epigenetics in dilated cardiomyopathy	Yu J., Zeng C., Wang Y.	2019	Excluded
849	Novel biomarkers in heart failure and cardio-oncology	Anker M.S., Von Haehling S., Anker S.D.	2019	Excluded
853	Analysis of changes in hepatic gene expression and tissue architecture of heart and kidney in association with diet-induced obesity in Rattus norvegicus	Batool T., Akhtar T., Asghar A., Khawar M.B., Sheikh N.	2019	Excluded
855	Targeting the cardiomyocyte cell cycle for heart regeneration	Locatelli P., Giménez C.S., Vega M.U., Crottogini A., Belaich M.N.	2019	Excluded
857	Concise Review: The Current State of Human In Vitro Cardiac Disease Modeling: A Focus on Gene Editing and Tissue Engineering	Hoes M.F., Bomer N., van der Meer P.	2019	Excluded
859	Ipilimumab for the treatment of metastatic prostate cancer	Alaia C., Boccellino M., Zappavigna S., Amler E., Quagliuolo L., Rossetti S., Facchini G., Caraglia M.	2018	Excluded
862	Downregulation of growth arrest-specific transcript 5 alleviates palmitic acid-induced myocardial inflammatory injury through the miR-26a/HMGB1/NF-κB axis	Yue Q., Zhao C., Wang Y., Zhao L., Zhu Q., Li G., Wu N., Jia D., Ma C.	2018	Excluded
865	Serum malondialdehyde, coenzyme Q10 and 8-hydroxy-2-deoxyguanosine levels in calves with foot-and-mouth disease	Özkan C., Huyut Z., Yildirim S., Özbek M., Icen H.	2018	Excluded
868	Long noncoding RNAs: A new player in the prevention and treatment of diabetic cardiomyopathy?	Ma C., Luo H., Liu B., Li F., Tschöpe C., Fa X.	2018	Excluded
869	Naringenin alleviates high D-glucose-induced injuries through upregulation of microRNA-30d-5p level in human AC16 cardiac cells	Jiang J., Liang G., Wu Z., Mo H., You Q., Wang Z., Wu K., Guo R.	2018	Excluded
872	Down-regulation of miR-327 alleviates ischemia/reperfusion-induced myocardial damage by targeting RP105	Yang Y., Yang J., Liu X.-W., Ding J.-W., Li S., Guo X., Yang C.-J., Fan Z.-X., Wang H.-B., Li Q., Wang H.-M., Yang J.	2018	Excluded
873	Association of Variants in BAG3 with Cardiomyopathy Outcomes in African American Individuals	Myers V.D., Gerhard G.S., McNamara D.M., Tomar D., Madesh M., Kaniper S., Ramsey F.V., Fisher S.G., Ingersoll R.G., Kasch-Semenza L., Wang J., Hanley-Yanez K., Lemster B., Schwisow J.A., Ambardekar A.V., Degann S.H., Bristow M.R., Sheppard R., Alexis J.D., Tilley D.G., Kontos C.D., McClung J.M., Taylor A.L., Yancy C.W., Khalili K., Seidman J.G., Seidman C.E., McTiernan C.F., Cheung J.Y., Feldman …	2018	Excluded
876	Hyperglycaemia-induced epigenetic changes drive persistent cardiac dysfunction via the adaptor p66 Shc	Costantino S., Paneni F., Mitchell K., Mohammed S.A., Hussain S., Gkolfos C., Berrino L., Volpe M., Schwarzwald C., Lüscher T.F., Cosentino F.	2018	Excluded
886	In vitro and in vivo experimental studies of PM2.5 on disease progression	Cho C.-C., Hsieh W.-Y., Tsai C.-H., Chen C.-Y., Chang H.-F., Lin C.-S.	2018	Excluded
887	MiRNA-214 Protects Sepsis-Induced Myocardial Injury	Ge C., Liu J., Dong S.	2018	Excluded
890	The effect of microRNA-21 on myocardial fibrosis in mice with chronic viral myocarditis	Xue Y., Chen M., Chen D., Wu W., Liu Y., Lin F.	2018	Excluded
894	Circulating microRNAs as biomarkers in pediatric heart diseases	Sucharov C.C., Miyamoto S.D., Garcia A.M.	2018	Excluded
899	Long non-coding RNA TUG1 inhibits apoptosis and inflammatory response in LPS-treated H9c2 cells by down-regulation of miR-29b	Zhang H., Li H., Ge A., Guo E., Liu S., Zhang L.	2018	Excluded
900	LncRNAs: Proverbial Genomic “Junk” or Key Epigenetic Regulators During Cardiac Fibrosis in Diabetes?	Biswas S., Thomas A.A., Chakrabarti S.	2018	Excluded
901	Arrhythmogenic right ventricular cardiomyopathy vs. dilated cardiomyopathy: Implications for next-generation sequencing and microRNA regulation in appropriate diagnosis - Authors' reply	Medeiros-Domingo A.	2018	Excluded
905	Chemotherapeutic-induced cardiovascular dysfunction: Physiological effects, early detection—the role of telomerase to counteract mitochondrial defects and oxidative stress	Quryshi N., Norwood Toro L.E., Ait-Aissa K., Kong A., Beyer A.M.	2018	Excluded
907	Pembrolizumab in patients with thymic carcinoma: a single-arm, single-centre, phase 2 study	Giaccone G., Kim C., Thompson J., McGuire C., Kallakury B., Chahine J.J., Manning M., Mogg R., Blumenschein W.M., Tan M.T., Subramaniam D.S., Liu S.V., Kaplan I.M., McCutcheon J.N.	2018	Excluded
909	LncRNA MALAT1 regulates sepsis-induced cardiac inflammation and dysfunction via interaction with miR-125b and p38 MAPK/NFκB	Chen H., Wang X., Yan X., Cheng X., He X., Zheng W.	2018	Excluded
911	Toll-like receptors signaling pathways as a potential therapeutic target in cardiovascular disease	Parizadeh S.M., Ghandehari M., Heydari-Majd M., Seifi S., Mardani R., Parizadeh S.M., Ghayour-Mobarhan M., Ferns G.A., Hassanian S.M., Avan A.	2018	Excluded
914	Nicotinamide riboside preserves cardiac function in a mouse model of dilated cardiomyopathy	Diguet N., Trammell S.A.J., Tannous C., Deloux R., Piquereau J., Mougenot N., Gouge A., Gressette M., Manoury B., Blanc J., Breton M., Decaux J.-F., Lavery G.G., Baczkó I., Zoll J., Garnier A., Li Z., Brenner C., Mericskay M.	2018	Excluded
915	Effect of mitochondrial dysfunction in diabetic cardiomyopathy and intervention of traditional Chinese medicine	Tian J., Lv R., Guo W.	2018	Excluded
918	Hyperglycemia-induced cardiac contractile dysfunction in the diabetic heart	Singh R.M., Waqar T., Howarth F.C., Adeghate E., Bidasee K., Singh J.	2018	Excluded
922	Viral heart disease-treatment	Pawlak A., Gil K.E., Dörr M.	2017	Excluded
923	Molecular and Cellular Mechanisms in Heart Failure	Puggia I., Rowland T.J., Miyamoto S.D., Sinagra G., Mestroni L.	2017	Excluded
924	The role of miR-214 in cardiovascular diseases	Zhao Y., Ponnusamy M., Zhang L., Zhang Y., Liu C., Yu W., Wang K., Li P.	2017	Excluded
927	MicroRNA-130a, a potential antifibrotic target in cardiac fibrosis	Li L., Bounds K.R., Chatterjee P., Gupta S.	2017	Excluded
931	Specific microRNA library of IFN-t on bovine endometrial epithelial cells	Wu H., Zhang T., Ma X., Jiang K., Zhao G., Qiu C., Deng G.	2017	Excluded
932	Failed Downregulation of Circulating MicroRNA-155 as a Marker of Adverse Left Ventricular Remodeling: A New Useful Tool for Cardiologists?	Buccheri D.	2017	Excluded
934	Lamin A/C -Related Cardiac Disease: Late Onset with a Variable and Mild Phenotype in a Large Cohort of Patients with the Lamin A/C p.(Arg331Gln) Founder Mutation	Hoorntje E.T., Bollen I.A., Barge-Schaapveld D.Q., Van Tienen F.H., Te Meerman G.J., Jansweijer J.A., Van Essen A.J., Volders P.G., Constantinescu A.A., Van Den Akker P.C., Van Spaendonck-Zwarts K.Y., Oldenburg R.A., Marcelis C.L., Van Der Smagt J.J., Hennekam E.A., Vink A., Bootsma M., Aten E., Wilde A.A., Van Den Wijngaard A., Broers J.L., Jongbloed J.D., Van Der Velden J., Van Den Berg M.P., V…	2017	Excluded
935	Genetic and epigenetic regulation of arrhythmogenic cardiomyopathy	Mazurek S., Kim G.H.	2017	Excluded
943	Down-regulation of microRNA-451a facilitates the activation and proliferation of CD4+ T cells by targeting Myc in patients with dilated cardiomyopathy	Zeng Z., Wang K., Li Y., Xia N., Nie S., Lv B., Zhang M., Tu X., Li Q., Tang T., Cheng X.	2017	PASS	PASS
946	MicroRNA-135a is up-regulated and aggravates myocardial depression in sepsis via regulating p38 MAPK/NF-κB pathway	Zheng G., Pan M., Jin W., Jin G., Huang Y.	2017	Excluded
947	Myeloid leukemia factor-1 is a novel modulator of neonatal rat cardiomyocyte proliferation	Rangrez A.Y., Pott J., Kluge A., Frauen R., Stiebeling K., Hoppe P., Sossalla S., Frey N., Frank D.	2017	Excluded
950	Cardiac syncope in a woman with undiagnosed celiac disease	Samy L., Barkun A., Huynh T.	2017	Excluded
955	miR-487b mitigates chronic heart failure through inhibition of the IL-33/ST2 signaling pathway	Wang E.-W., Jia X.-S., Ruan C.-W., Ge Z.-R.	2017	Excluded
956	Biosystem models, generated from a complex rule/reaction/influence network and from two functionality prototypes	Varga M., Prokop A., Csukas B.	2017	Excluded
957	Familial dilated cardiomyopathy: A multidisciplinary entity, from basic screening to novel circulating biomarkers	de Gonzalo-Calvo D., Quezada M., Campuzano O., Perez-Serra A., Broncano J., Ayala R., Ramos M., Llorente-Cortes V., Blasco-Turrión S., Morales F.J., Gonzalez P., Brugada R., Mangas A., Toro R.	2017	Excluded
959	Circulating Noncoding RNAs as Biomarkers of Cardiovascular Disease and Injury	Viereck J., Thum T.	2017	Excluded
964	Down-regulation of miR-30b reduces cardiomyocyte apoptosis by targeting Bcl-2 in diabetic cardiomyopathy	Diao X., Li G.	2017	Excluded
971	Isolation and characterization of three benzylisoquinoline alkaloids from Thalictrum minus L. and their antibacterial activity against bovine mastitis	Mushtaq S., Rather M.A., Qazi P.H., Aga M.A., Shah A.M., Shah A., Ali M.N.	2016	Excluded
972	Early detection of myocardial infarction-microRNAs right at the time?	Kränkel N., Blankenberg S., Zeller T.	2016	Excluded
973	Cardiac fibrosis and miR-433	Oh J.G., Hajjar R.J., Park W.J.	2016	Excluded
975	December 2016 at a glance: cardiac metabolism, myocarditis, right ventricular function and prognostic markers	Metra M.	2016	Excluded
983	Cardiac Electrical and Structural Changes During Bacterial Infection: An Instructive Model to Study Cardiac Dysfunction in Sepsis	Makara M.A., Hoang K.V., Ganesan L.P., Crouser E.D., Gunn J.S., Turner J., Schlesinger L.S., Mohler P.J., Rajaram M.V.S.	2016	Excluded
985	Absent MicroRNAs in Different Tissues of Patients with Acquired Cardiomyopathy	Siegismund C.S., Rohde M., Kühl U., Escher F., Schultheiss H.P., Lassner D.	2016	PASS	No data
988	Effect of creatine phosphate sodium on miRNA378, miRNA378* and calumenin mRNA in adriamycin-injured cardiomyocytes	Miao Y.U., Zhi-Hui H.E., Li-Ying X., Xiao-Tong S., Jie L., Jing-Yi F., Yu W., Ming Z.	2016	Excluded
989	The relationship between miRNA378, calumenin and endoplasmic reticulum stress in suckling mouse myocardium with myocarditis caused by adriamycin	Zhao M., Cui X.-X., Yu M., Wang Y.-L., Long J., Zhao Q.	2016	Excluded
992	Inflammatory and fibrotic responses of cardiac fibroblasts to myocardial damage associated molecular patterns (DAMPs)	Turner N.A.	2016	Excluded
996	Serum microRNA-21 expression is significantly down-regulated in patients with dilated cardiomyopathy	Gui-Fen X., Zhi-Yuan W., Wei Y.	2016	PASS	No text
998	MicroRNAs as circulating biomarkers of left ventricular remodeling after myocardial infarction	Bauters C., Pinet F.	2016	Excluded
999	MicroRNAs as pathophysiological targets: An emerging nexus for personalized medicine in heart failure?	Feinberg M.W.	2016	Excluded
1000	MicroRNA and pathogenesis of enterovirus infection	Ho B.-C., Yang P.-C., Yu S.-L.	2016	Excluded
1002	Micro-RNA in cardiovascular diseases	Sharma R., Hemnani T., Gupta A.K., Singh R.B., Darlenska T.H., Hristova K.	2016	Excluded
1003	MiR-423-5p inhibits human cardiomyoblast proliferation and induces cell apoptosis by targeting Gab 1	Li Q., Yu Q., Na R., Liu B.	2016	PASS	Improper diagnosis
1005	Cardiovascular diseases and miRNA [Kardiovaskulárne ochorenia a miRNA]	Rabajdová M., Urban P., Špaková I., Mária M.	2016	Excluded
1006	Myocarditis	Fung G., Luo H., Qiu Y., Yang D., McManus B.	2016	Excluded
1008	Role of biomarkers in cardiac structure phenotyping in heart failure with preserved ejection fraction: Critical appraisal and practical use	D'Elia E., Vaduganathan M., Gori M., Gavazzi A., Butler J., Senni M.	2015	Excluded
1009	Pericardial and myocardial disease	Lüscher T.F.	2015	Excluded
1018	Titin mutations in iPS cells define sarcomere insufficiency as a cause of dilated cardiomyopathy	Hinson J.T., Chopra A., Nafissi N., Polacheck W.J., Benson C.C., Swist S., Gorham J., Yang L., Schafer S., Sheng C.C., Haghighi A., Homsy J., Hubner N., Church G., Cook S.A., Linke W.A., Chen C.S., Seidman J.G., Seidman C.E.	2015	Excluded
1023	The kidneys and ANCA-associated vasculitis: From pathogenesis to diagnosis	Rowaiye O.O., Kusztal M., Klinger M.	2015	Excluded
1024	Connexin and fibrosis related microRNAs in complex fractionated atrial electrograms	Yang H., Wu C., Xiao Y., Zhou S.	2015	Excluded
1027	Peripartum cardiomyopathy: Current management and future perspectives	Hilfiker-Kleiner D., Haghikia A., Nonhoff J., Bauersachs J.	2015	Excluded
1030	Defining phenotypes and disease progression in sarcomeric cardiomyopathies: Contemporary role of clinical investigations	Olivotto I., D'Amati G., Basso C., Van Rossum A., Patten M., Emdin M., Pinto Y., Tomberli B., Camici P.G., Michels M.	2015	Excluded
1031	Endomyocardial biopsy and ultrastructural changes in dilated cardiomyopathy: Taking a 'deeper' look into patients' prognosis	Savvatis K., Schultheiss H.-P., Tschöpe C.	2015	Excluded
1032	Myocardial infarction and inflammation: Lost in the biomarker labyrinth	Hristov M., Weber C.	2015	Excluded
1033	Myostatin and IGF-I signaling in end-stage human heart failure: A qRT-PCR study	Baán J.A., Varga Z.V., Leszek P., Kuśmierczyk M., Baranyai T., Dux L., Ferdinandy P., Braun T., Mendler L.	2015	PASS	PASS
1035	Current and future strategies for the diagnosis and treatment of cardiac fibrosis	Roche P.L., Czubryt M.P.	2015	Excluded
1044	Noncoding RNAs and myocardial fibrosis	Thum T.	2014	Excluded
1045	Peroxynitrite-mediated nitrosative stress decreases motility and mitochondrial membrane potential in human spermatozoa	Uribe P., Boguen R., Treulen F., Sänchez R., Villegas J.V.	2014	Excluded
1048	NLRP3 gene silencing ameliorates diabetic cardiomyopathy in a type 2 diabetes rat model	Luo B., Li B., Wang W., Liu X., Xia Y., Zhang C., Zhang M., Zhang Y., An F.	2014	Excluded
1049	MicroRNAs in cardiovascular diseases: Current knowledge and the road ahead	Condorelli G., Latronico M.V.G., Cavarretta E.	2014	Excluded
1052	Novel biomarkers in heart failure: Usefulness in clinical practice	Siasos G., Tousoulis D., Oikonomou E., Kokkou E., Mazaris S., Konsola T., Stefanadis C.	2014	Excluded
1053	Fibrosis and heart failure	Segura A.M., Frazier O.H., Buja L.M.	2014	Excluded
1056	Cardiac sodium channel mutations: Why so many phenotypes?	Liu M., Yang K.-C., Dudley S.C.	2014	Excluded
1058	Multisystemic toxoplasmosis associated with a type II-like Toxoplasma gondii strain in a New Zealand fur seal (Arctocephalus forsteri) from New South Wales, Australia	Donahoe S.L., Rose K., Šlapeta J.	2014	Excluded
1060	Novel biomarkers for acute myocardial infarction: Is microRNA the new kid on the block?	Raizman J.E., Diamandis E.P., Rayner K., Dimmeler S., Calin G.A., Thum T.	2014	Excluded
1061	Pathophysiology and epidemiology of peripartum cardiomyopathy	Hilfiker-Kleiner D., Sliwa K.	2014	Excluded
1062	MicroRNA-21 regulation of the progression of viral myocarditis to dilated cardiomyopathy	Xu H.-F., Ding Y.U.-J., Zhang Z.-X., Wang Z.U.-F., Luo C.-L., Li B.-X.U., Shen Y.I.-W., Tao L.U.-Y., Zhao Z.I.-Q.	2014	PASS	Improper diagnosis
1063	Coxsackievirus B Exits the Host Cell in Shed Microvesicles Displaying Autophagosomal Markers	Robinson S.M., Tsueng G., Sin J., Mangale V., Rahawi S., McIntyre L.L., Williams W., Kha N., Cruz C., Hancock B.M., Nguyen D.P., Sayen M.R., Hilton B.J., Doran K.S., Segall A.M., Wolkowicz R., Cornell C.T., Whitton J.L., Gottlieb R.A., Feuer R.	2014	Excluded
1064	Chromosomal engineering of escherichia coli for efficient production of coenzyme Q10	Huang M., Chen Y., Liu J.	2014	Excluded
1066	RAGE and NF-βB signaling in heart disease	Volz H.C., Schiekofer S., Kaya Z., Katus H.A., Andrassy M.	2013	Excluded
1070	A Review of JACC Journal Articles on the Topic of Cardiac Imaging: 2011–2012	The Editors	2013	Excluded
1079	Diagnostic and Therapeutic Potentials of microRNAs in Heart Failure	Oikonomou E., Siasos G., Tousoulis D., Kokkou E., Genimata V., Zisimos K., Latsios G., Stefanadis C.	2013	Excluded
1089	MiRNA expression in pediatric failing human heart	Stauffer B.L., Russell G., Nunley K., Miyamoto S.D., Sucharov C.C.	2013	PASS	Improper diagnosis
1090	New technologies, new therapies: Toward personalized medicine in heart failure patients?	De Groote P., Pinet F., Bauters C.	2013	Excluded
1091	Topoisomerase inhibitors in metastatic breast cancer: Overview of current practice and future development	Vanderbeeken M.-C., Aftimos P.G., Awada A.	2013	Excluded
1093	European perspectives	[No author name available]	2013	Excluded
1094	The role and significance of microRNA in human cardiovascular disease and forensic science	Li L.-L., Zhao Z.-Q.	2013	Excluded
1095	The autoimmune side of heart and lung diseases	Agmon-Levin N., Selmi C.	2013	Excluded
1099	Roles of miRNA in cardiovascular development and dysfunction	Huang W., Yu Q., Wang Q., Cao F.	2013	Excluded
1103	Tandem high-dose chemotherapy and autologous stem cell transplantation in patients with high-risk neuroblastoma: Results of SMC NB-2004 study	Sung K.W., Son M.H., Lee S.H., Yoo K.H., Koo H.H., Kim J.Y., Cho E.J., Lee S.K., Choi Y.S., Lim D.H., Kim J.-S., Kim D.W.	2013	Excluded
1106	Cardiac myocyte-fibroblast interactions and the coronary vasculature	Bowers S.L.K., Baudino T.A.	2012	Excluded
1107	Bioinformatics analysis reveals transcriptome and microRNA signatures and drug repositioning targets for IBD and other autoimmune diseases	Clark P.M., Dawany N., Dampier W., Byers S.W., Pestell R.G., Tozeren A.	2012	Excluded
1108	Cardiovascular disease and diabetes: The vulnerable patient	Hess K., Marx N., Lehrke M.	2012	Excluded
1109	MicroRNA therapeutics for cardiovascular disease: Opportunities and obstacles	Van Rooij E., Olson E.N.	2012	Excluded
1111	Heart failure update: A never-ending story	Maisch B.	2012	Excluded
1113	Genetic cardiomyopathies: Lessons learned from humans, mice, and zebrafish	Kloos W., Katus H.A., Meder B.	2012	Excluded
1117	Posttranscriptional regulation of connexin-43 expression	Klotz L.-O.	2012	Excluded
1121	The E2F6 repressor activates gene expression in myocardium resulting in dilated cardiomyopathy	Westendorp B., Major J.L., Nader M., Salih M., Leenen F.H.H., Tuana B.S.	2012	Excluded
1123	Immune-regulatory mechanisms in systemic autoimmune and rheumatic diseases	Nakken B., Alex P., Munthe L., Szekanecz Z., Szodoray P.	2012	Excluded
1124	Endogenous migration modulators as parent compounds for the development of novel cardiovascular and anti-inflammatory drugs	Poller W., Rother M., Skurk C., Scheibenbogen C.	2012	Excluded
1129	Q fever at the turn of the century	Chmielewski T., Tylewska-Wierzbanowska S.	2012	Excluded
1130	The level of blood plasma mitochondrial DNA upon acute myocardium damage in experiment	Sudakov N.P., Popkova T.P., Novikova M.A., Katyshev A.I., Nikiforov S.B., Pushkarev B.G., Goldberg O.A., Klimenkov I.B., Lepekhova S.A., Ezhikeeva S.D., Ten M.N., Osipov V.G., Konstantinov Y.M.	2012	Excluded
1133	Circulating MicroRNAs: Biomarkers or mediators of cardiovascular diseases?	Fichtlscherer S., Zeiher A.M., Dimmeler S.	2011	Excluded
1135	Comprehensive analysis of human microRNA target networks	Satoh J.-I., Tabunoki H.	2011	Excluded
1137	C/EBP homologous protein deficiency attenuates myocardial reperfusion injury by inhibiting myocardial apoptosis and inflammation	Miyazaki Y., Kaikita K., Endo M., Horio E., Miura M., Tsujita K., Hokimoto S., Yamamuro M., Iwawaki T., Gotoh T., Ogawa H., Oike Y.	2011	Excluded
1139	Cyclophosphamide as disease-modifying therapy for scleroderma: Pros and cons	Chighizola C., Ong V.H., Denton C.P.	2011	Excluded
1141	Nitric oxide-derived oxidants with a focus on peroxynitrite: Molecular targets, cellular responses and therapeutic implications	Calcerrada P., Peluffo G., Radi R.	2011	Excluded
1142	15th annual meeting of the European Council for Cardiovascular Research (ECCR)	Steckelings U.M., De Mey J.G.R., Pinto-Sietsma S.-J., Henrion D., Unger T.	2011	Excluded
1144	Circulating MicroRNAs as biomarkers and potential paracrine mediators of cardiovascular disease	Gupta S.K., Bang C., Thum T.	2010	Excluded
1145	Antisense modulation of both exonic and intronic splicing motifs induces skipping of a DMD pseudo-exon responsible for X-linked dilated cardiomyopathy	Rimessi P., Fabris M., Bovolenta M., Bassi E., Falzarano S., Gualandi F., Rapezzi C., Coccolo F., Perrone D., Medici A., Ferlini A.	2010	Excluded
1152	Myocardial inflammation and injury induced by coronary microembolization in rats: role of ERK1/2 signaling pathway	Li L., Li D.-H., Qu N., Wen W.-M., Huang W.-Q., Liu T.-W.	2010	Excluded
1153	Cardiac-specific overexpression of catalase identifies hydrogen peroxide-dependent and-independent phases of myocardial remodeling and prevents the progression to overt heart failure in Gαq-overexpressing transgenic mice	Qin F., Lennon-Edwards S., Lancel S., Biolo A., Siwik D.A., Pimentel D.R., Dorn G.W., Kang Y.J., Colucci W.S.	2010	Excluded
1164	A missense mutation in the CHRM2 gene is associated with familial dilated cardiomyopathy	Zhang L., Hu A., Yuan H., Cui L., Miao G., Yang X., Wang L., Liu J., Liu X., Wang S., Zhang Z., Liu L., Zhao R., Shen Y.	2008	Excluded
1167	Electrotransfer of therapeutic molecules into tissues	Cemazar M., Sersa G.	2007	Excluded
1169	CTLA-4 ablation and interleukin-12-driven differentiation synergistically augment cardiac pathogenicity of cytotoxic T lymphocytes	Love V.A., Grabie N., Duramad P., Stavrakis G., Sharpe A., Lichtman A.	2007	Excluded
1170	Exploring in vitro roles of siRNA in cardiovascular disease	Tang Y., Ge Y.-Z., Yin J.Q.	2007	Excluded
1171	Cardiac troponin I release in non-ischemic reversible myocardial injury from parvovirus B19 myocarditis	Baig M.A., Ali S., Khan M.U., Rasheed J., Qadir A., Vasavada B.C., Khan I.A.	2006	Excluded
1172	Significance of 8-Hydroxy-2′-Deoxyguanosine Levels in Patients With Idiopathic Dilated Cardiomyopathy	Watanabe E., Matsuda N., Shiga T., Kajimoto K., Ajiro Y., Kawarai H., Kasanuki H., Kawana M.	2006	Excluded
1173	Antibody-mediated disease remission in the mouse model of lyme borreliosis	Barthold S.W., Hodzic E., Tunev S., Feng S.	2006	Excluded
1174	Potential applications of small interfering RNAs in the cardiovascular field	Agostini F., Dapas B., Farra R., Grassi M., Racchi G., Klingel K., Kandolf R., Heidenreich O., Mercatanti A., Rainaldi G., Altamura N., Guarnieri G., Grassi G.	2006	Excluded
1176	Panax ginseng reduces adriamycin-induced heart failure in rats	You J.-S., Huang H.-F., Chang Y.-L.	2005	Excluded
1179	Doxorubicin-induced cardiac mitochondrionopathy	Wallace K.B.	2003	Excluded
1180	Cardiac toxicity of antineoplastic anthracyclines	Zucchi R., Danesi R.	2003	Excluded
1182	Preexisting antiadenoviral immunity and regional myocardial gene transfer: Modulation by nitric oxide	Szelid Z., Sinnaeve P., Vermeersch P., Gillijns H., Pellens M., Laurysens V., Van Pelt N., Flameng W., Sergeant P., Herijgers P., Pokreisz P., Van Zonneveld A.-J., Verbeken E., Collen D., Janssens S.	2002	Excluded
1183	Synergy of type I interferon-A6 and interferon-B naked DNA immunotherapy for cytomegalovirus infection	Bartlett E.J., Cull V.S., Brekalo N.L., Lenzo J.C., James C.M.	2002	Excluded
1184	The gene expression fingerprint of human heart failure	Tan F.-L., Moravec C.S., Li J., Apperson-Hansen C., McCarthy P.M., Young J.B., Bond M.	2002	PASS	Improper diagnosis
1185	Temocapril treatment ameliorates autoimmune myocarditis associated with enhanced cardiomyocyte thioredoxin expression	Yuan Z., Kishimoto C., Shioji K., Nakamura H., Yodoi J., Sasayama S.	2002	Excluded
1187	Ca 2+-desensitizing effect of a deletion mutation ΔK210 in cardiac troponin T that causes familial dilated cardiomyopathy	Morimoto S., Lu Q.-W., Harada K., Takahashi-Yanaga F., Minakami R., Ohta M., Sasaguri T., Ohtsuki I.	2002	Excluded
1188	Global gene expression profiling of end-stage dilated cardiomyopathy using a human cardiovascular-based cDNA microarray	Barrans J.D., Allen P.D., Stamatiou D., Dzau V.J., Liew C.-C.	2002	Excluded
1189	Cardiotoxicity induced by anthracyclines	Papathanasiou A., Chaidos A., Goudevenos I., Mpourantas K.	2001	Excluded
1191	Mitochondrial function in heart failure	Schulze K., Dörner A., Schultheiß H.-P.	1999	Excluded
1193	Decreased cellular respiratory function and mitochondrial DNA mutations in the human heart associated with ageing and disease	Wei Y.-H., Lee H.-C., Wang E.K., Pang C.-Y.	1997	Excluded
1194	Annexin VI overexpression targeted to heart alters cardiomyocyte function in transgenic mice	Gunteski-Hamblin A.-M., Song G., Walsh R.A., Frenzke M., Boivin G.P., Dorn II G.W., Kaetzel M.A., Horseman N.D., Dedman J.R.	1996	Excluded
1197	Does the analysis of DNA in myocytes have meaning? [Ha significato l'analisi del DNA nei miociti?]	Luciani M., Rocco M., Pizzolitto S., Antoci B.	1991	Excluded
1198	Selective alterations in rat cardiac mRNA induced by doxorubicin: Possible subcellular mechanisms	Papoian T., Lewis W.	1991	Excluded
1234	THE PATHOGENESIS OF DILATED CARDIOMYOPATHY	OLSEN, EGJ	1992	Excluded
1235	Three Myocardial Diseases in One Heart: Arrhythmogenic Right Ventricular Cardiomyopathy, Left Ventricular Noncompaction and Myocarditis	Lutokhina, Y; Blagova, O; Varionchik, N; Alexandrova, S; Gagarina, N; Kogan, E; Sedov, V; Shestak, A; Zaklyazminskaya, E; Nedostup, A	2021	Excluded
1254	RETRACTED: Upregulated microRNA-132 rescues cardiac fibrosis and restores cardiocyte proliferation in dilated cardiomyopathy through the phosphatase and tensin homolog-mediated PI3K/Akt signal transduction pathway (Retracted article. See vol. 122, 2021)	Zhang, CJ; Huang, Y; Lu, JD; Lin, J; Ge, ZR; Huang, H	2019	Excluded
1273	Genetic and ultrastructural studies in dilated cardiomyopathy patients: a large deletion in the lamin A/C gene is associated with cardiomyocyte nuclear envelope disruption	Gupta, P; Bilinska, ZT; Sylvius, N; Boudreau, E; Veinot, JP; Labib, S; Bolongo, PM; Hamza, A; Jackson, T; Ploski, R; Walski, M; Grzybowski, J; Walczak, E; Religa, G; Fidzianska, A; Tesson, F	2010	Excluded
1284	Cardiac Microrna-208a is Upregulated and Positively Correlates With Cardiomyocyte Apoptosis in End Stage Dilated Cardiomyopathy	Tony, H; Yu, KW; Ma, WH; Zhao, XQ; Liu, YZ; Zeng, QT	2015	PASS	Improper diagnosis
1286	Use of Biomarkers for the Prediction of Treatment Response: Immunoadsorption in Dilated Cardiomyopathy as a Clinical Example	Dorr, M; Volker, U; Felix, SB	2015	Excluded
1304	Reconstruction and Analysis of the lncRNA-miRNA-mRNA Network Based on Competitive Endogenous RNA Reveal Functional lncRNAs in Dilated Cardiomyopathy (vol 10, 1149, 2019)	Tao, LC; Yang, L; Huang, XL; Hua, F; Yang, XY	2022	PASS	PASS
1305	MicroRNA-133a Mediated Regulation of Membrane Type-1 Matrix Metalloproteinase in Myocardial Fibroblasts: Differential Effects in Dilated Cardiomyopathy	Akerman, AW; Stroud, RE; Patel, RK; McDermott, PJ; Spinale, FC; Mukhejee, R; Ikonomidis, JS; Jones, JA	2013	Excluded
1309	Non-coding RNA in Ischemic and Non-ischemic Cardiomyopathy	Lu, YW; Wang, DZ	2018	Excluded
1322	Circulating miRNAs a Novel Tool to Assess BAG3 Related Dilated Cardiomyopathy	Toro, R; Saura, M; De Gonzalo, D; Llorente-Cortes, V; Rosa-Longobardo, F; Mangas, A; Zamorano, JL; Zaragoza, C	2017	Excluded
1329	Construction of microRNA and transcription factor regulatory network based on gene expression data in cardiomyopathy	Wang, L; Hu, JH; Xing, HJ; Sun, M; Wang, JL; Jian, Q; Yang, H	2014	Excluded
1330	miR-217 and miR-543 downregulation mitigates inflammatory response and myocardial injury in children with viral myocarditis by regulating the SIRT1/AMPK/NF-kappa B signaling pathway	Xia, K; Zhang, Y; Sun, DM	2020	PASS	Duplicate
1331	Construction of miRNA-target networks using microRNA profiles of CVB3-infected HeLa cells	Yao, HL; Liu, M; Wang, WJ; Wang, XL; Song, J; Song, QQ; Han, J	2019	Excluded
1333	Differential Expression of miRNAs in BAG3-mutation Carriers With Dilated Cardiomyopathy	Zaragoza, C; Saura, M; de Gonzalo, D; Hernandez, I; Diez, J; Mangas, A; Zamorano, JL; Toro, R	2017	Excluded
1348	MicroRNA Expression Profiles in Endomyocardial Biopsies From Patients With Myocarditis - Association With Left Ventricular Function and Clinical Events	Besler, C; Urban, D; Watzka, S; Klingel, K; Kandolf, R; Schuler, G; Adams, V; Lurz, P	2015	PASS	PASS
1355	Non-invasive Diagnosis of Myocarditis with Micro RNA	Krome, S	2021	Excluded
1357	Validated MicroRNA Target Databases: An Evaluation	Lee, YJ; Kim, V; Muth, DC; Witwer, KW	2015	Excluded
1358	The arrhythmogenic cardiomyopathy-specific coding and non-coding transcriptome in human cardiac stromal cells	Rainer, J; Meraviglia, V; Blankenburg, H; Piubelli, C; Pramstaller, PP; Paolin, A; Cogliati, E; Pompilio, G; Sommariva, E; Domingues, FS; Rossini, A	2018	Excluded
1359	A PLASMATIC MICRORNA FINGERPRINT FOR REDUCED EJECTION FRACTION IN DILATED CARDIOMYOPATHY	Toro, R; Pacheco, G; Calderon, M; Ramos, M; Quezada-Feijoo, M; Bermudez, A; Montelongo, MDC; Navarro, AP; Rodriguez-Leal, C; Belmonte, T; Mangas, A	2021	Excluded
1360	FIBROSIS-RELATED GENE AND MICRORNA EXPRESSION IN PEDIATRIC IDIOPATHIC DILATED CARDIOMYOPATHY	Nguyen, H; Siomos, A; Nunley, K; Stauffer, BL; Sucharov, CC; Miyamoto, S	2015	Excluded
1362	Identification of Cardiac CircRNAs in Mice With CVB3-Induced Myocarditis	Nie, X; Fan, JH; Li, HH; Wang, J; Xie, R; Chen, C; Wang, DW	2022	Excluded
1365	ITPase deficiency causes a Martsolf-like syndrome with a lethal infantile dilated cardiomyopathy	Handley, MT; Reddy, K; Wills, J; Rosser, E; Kamath, A; Halachev, M; Falkous, G; Williams, D; Cox, P; Meynert, A; Raymond, ES; Morrison, H; Brown, S; Allan, E; Aligianis, I; Jackson, AP; Ramsahoye, BH; von Kriegsheim, A; Taylor, RW; Finch, AJ; FitzPatrick, DR	2019	Excluded
1374	A Kaposi's Sarcoma-Associated Herpes Virus-Encoded microRNA Induces Dilated Cardiomyopathy	Chen, C; Zhao, YR; Wang, DW	2019	Excluded
1375	Microrna Regulating Protein Bicc1 Causes Dilated Cardiomyopathy Through Modulation of Polycystin-2	Yagi, H; Liu, XQ; Chatterjee, B; Li, Y; Srinivasan, A; Kim, A; Farkas, D; Francis, R; Ho, J; Tobita, K; Lo, CW	2012	Excluded
1378	MicroRNA-186-5p is expressed highly in ethanol-induced cardiomyocytes and regulates apoptosis via the target gene XIAP	Liu, Y; Yu, B	2019	Excluded
1380	Adverse Intrauterine Environment and Cardiac miRNA Expression	Lock, MC; Botting, KJ; Tellam, RL; Brooks, D; Morrison, JL	2017	Excluded
1381	The Role of MicroRNAs in Arrhythmogenic Cardiomyopathy: Biomarkers or Innocent Bystanders of Disease Progression?	Marinas, MB; Celeghin, R; Cason, M; Thiene, G; Basso, C; Pilichou, K	2020	Excluded
1386	Integrated left ventricular global microRNA and mRNA profiling in human idiopathic dilated cardiomyopathy	Colak, D; Al-Harazi, O; Kaya, IH; Muiya, NP; Kaya, N; Dzimiri, N	2022	PASS	No text
1387	Phenotyping and outcome on contemporary management in a German cohort of patients with peripartum cardiomyopathy	Haghikia, A; Podewski, E; Libhaber, E; Labidi, S; Fischer, D; Roentgen, P; Tsikas, D; Jordan, J; Lichtinghagen, R; von Kaisenberg, CS; Struman, I; Bovy, N; Sliwa, K; Bauersachs, J; Hilfiker-Kleiner, D	2013	Excluded
1391	MicroRNA profiles in patients with cardiac amyloidosis and dilated cardiomyopathy - A preliminary epigenetic approach	Becker, S; Florian, AR; Roesch, S; Winter, S; Sechtem, U; Schwab, M; Schaeffeler, E; Yilmaz, A	2016	Excluded
1392	Role of circulating microRNA-16-5p, a new therapeutic target for ischemic dilated cardiomyopathy	Calderon-Dominguez, M; Belmonte, T; Ramos, M; Quezada-Feijoo, M; Perez-Navarro, A; Alcala, M; Viana, M; Leal, CR; Mangas, A; Toro, R	2020	Excluded
1394	Foxo3a Regulates Response to Coxsackievirus B3 Myocarditis via microRNA-155 Triggered NK-cell Activity	Holzhauser, L; Loebel, M; Jenke, A; Bauer, S; Demski, S; Wilk, S; Pinkert, S; Fechner, H; Poller, W; Schultheiss, HP; Scheibenbogen, C; Skurk, C	2014	Excluded
1396	Multivariate miRNA signatures as biomarkers for non-ischaemic systolic heart failure	Vogel, B; Keller, A; Frese, KS; Leidinger, P; Sedaghat-Hamedani, F; Kayvanpour, E; Kloos, W; Backe, C; Thanaraj, A; Brefort, T; Beier, M; Hardt, S; Meese, E; Katus, HA; Meder, B	2013	PASS	Improper diagnosis
1397	MiRNA-dependent susceptibility in experimental autoimmune myocarditis	Bockstahler, M; Fischer, A; Mueller, AM; Oettl, R; Katus, H; Kaya, Z	2016	Excluded
1398	Genetics of hypertrophic cardiomyopathy: A review of current state	Sabater-Molina, M; Perez-Sanchez, I; del Rincon, JPH; Gimeno, JR	2018	Excluded
1402	Multiparametric diagnostics of cardiomyopathies by microRNA signatures	Siegismund, CS; Rohde, M; Kuhl, U; Lassner, D	2014	Excluded
1403	Role of microRNA in metabolic shift during heart failure	Pinti, MV; Hathaway, QA; Hollander, JM	2017	Excluded
1405	MicroRNA Regulation in Cardiovascular Disease	Martins, PAD; Leptidis, S; Salic, K; De Windt, LJ	2010	Excluded
1412	MicroRNA and Heart Failure	Wong, LL; Wang, J; Liew, OW; Richards, AM; Chen, YT	2016	Excluded
1413	DIFFERENTIAL INTERVENTRICULAR EXPRESSION OF MICRORNA-21,-93,-151,-221 AND-582, IN DILATED CARDIOMYOPATHY WITH BIVENTRICULAR DYSFUNCTION	Powers, J; McCormick, RC; Grifoni, G; Roul, DEM; Nanayakkara, G; Recchia, FA; Tsai, E	2015	Excluded
1418	Lycium barbarum polysaccharides restore adverse structural remodelling and cardiac contractile dysfunction induced by overexpression of microRNA-1	Zhang, R; Xu, Y; Niu, HF; Tao, T; Ban, T; Zheng, LY; Ai, J	2018	Excluded
1420	Role of Toll-like receptors in cardiovascular diseases	Vallejo, JG	2011	Excluded
1421	Liposomal nanoparticle-based miR-155 antagonist regulates Th17/Treg signaling pathway and its inhibitory effect against myocarditis	Yu, HM; Shi, MJ; Sun, JD; Yuan, H	2022	Excluded
1422	Deletion of miRNA-146a Alters Host Immune Response to Coxsackievirus B3 with Activation of NK cells	Narezkina, A; Lim, BK; Grivennikov, S; Boldin, M; Taganov, K; Baltimore, D; Knowlton, KU	2012	Excluded
1429	Refining Diagnostic MicroRNA Signatures by Whole-miRNome Kinetic Analysis in Acute Myocardial Infarction	Vogel, B; Keller, A; Frese, KS; Kloos, W; Kayvanpour, E; Sedaghat-Hamedani, F; Hassel, S; Marquart, S; Beier, M; Giannitsis, E; Hardt, S; Katus, HA; Meder, B	2013	Excluded
1433	MicroRNAs: From Junk RNA to Life Regulators and Their Role in Cardiovascular Disease	Amodio, F; Caiazza, M; Fimiani, F; Calabro, P; Limongelli, G	2021	Excluded
1434	Gene and miRNA expression analyses in patients with inflammatory vs. idiopathic dilated cardiomyopathy: specific transcriptomes in different non-ischemic cardiac diseases	Becker, S; Schaeffeler, E; Florian, A; Rosch, S; Winter, S; Sechtem, U; Schwab, M; Yilmaz, A	2015	Excluded
1436	Association of S100B 3'UTR polymorphism with risk of chronic heart failure in a Chinese Han population	Chen, YW; Chen, XH; Yao, MZ; Chen, L; Chen, WW; Liu, XX	2020	Excluded
1439	Endogenous mitochondrial oxidative stress in MnSOD-deficient mouse embryonic fibroblasts promotes mitochondrial DNA glycation	Breyer, V; Weigel, I; Huang, TT; Pischetsrieder, M	2012	Excluded
1442	MicroRNA-208 Expression is Associated With a Shift in the Balance of Myosin Heavy Chain Isoforms in Human Dilated Cardiomyopathy	Satoh, M; Minami, Y; Takahashi, Y; Tabuchi, T; Nakamura, M	2009	PASS	PASS
1443	Construction and analysis of a lncRNA-miRNA-mRNA network based on competitive endogenous RNA reveals functional lncRNAs in diabetic cardiomyopathy	Chen, K; Ma, YC; Wu, SY; Zhuang, YX; Liu, X; Lv, L; Zhang, GH	2019	Excluded
1444	MicroRNA expression profiling in patients with lamin A/C-associated muscular dystrophy	Sylvius, N; Bonne, G; Straatman, K; Reddy, T; Gant, TW; Shackleton, S	2011	Excluded
1445	Bright red-emitting highly reliable styryl probe with large stokes shift for visualizing mitochondria in live cells under wash-free conditions	Abeywickrama, CS; Wijesinghe, KJ; Stahelin, RV; Pang, Y	2019	Excluded
1446	IGF-1 deficiency resists cardiac hypertrophy and myocardial contractile dysfunction: role of microRNA-1 and microRNA-133a	Hua, YN; Zhang, YM; Ren, J	2012	Excluded
1454	Differential microRNA gene expression levels in patients with acute myocarditis	Marketou, M; Kontaraki, J; Konstantinou, J; Parthenakis, F; Nakou, H; Lempidakis, D; Vernardos, M; Fragkiadakis, K; Loulakakis, M; Theodosaki, O; Kochiadakis, G; Logakis, J; Vougia, D; Vardas, P	2017	PASS	PASS
1456	MicroRNA-221/-222 amends protective mechanisms in CVB3-induced murine myocarditis	Heggermont, WA; Corsten, M; Papageorgiou, A; Thibaut, H; Verhesen, W; Carai, P; Van Leeuwen, R; Neyts, J; Schroen, B; Heymans, S	2014	Excluded
1457	Suppression of Induced microRNA-15b Prevents Rapid Loss of Cardiac Function in a Dicer Depleted Model of Cardiac Dysfunction	Roy, S; Banerjee, J; Gnyawali, SC; Khanna, S; He, GL; Pfeiffer, D; Zweier, JL; Sen, CK	2013	Excluded
1458	MicroRNA-155 mediates cardiac inflammation and injury in acute viral myocarditis	Corsten, MF; Verhesen, W; Papageorgiou, AP; Carai, P; Lindow, M; Obad, S; Summer, G; De Rijck, L; Coort, S; Hazebroek, M; Van Leeuwen, R; Gijbels, M; De Winther, MPJ; Stassen, FRM; Kauppinen, S; Schroen, B; Heymans, S	2012	PASS	No text
1460	Differential regulation of miRNA and mRNA expression in the myocardium of Nrf2 knockout mice	Quiles, JM; Narasimhan, M; Shanmugam, G; Milash, B; Hoidal, JR; Rajasekaran, NS	2017	Excluded
1475	Noncoding RNAs in disease	Lekka, E; Hall, J	2018	Excluded
1478	MicroRNA-21 gene expression levels in peripheral monocytes reflect myocardial damage in acute myocarditis	Marketou, M; Konstantinou, J; Kontaraki, J; Parthenakis, F; Nakou, H; Touloupaki, M; Kochiadakis, G; Logakis, G; Vougia, D; Patrianakos, A; Maragkoudakis, S; Vardas, P	2016	PASS	PASS
1480	RETRACTED: Effects of microrna-93 on mouse cardiac microvascular endothelial cells injury and inflammatory response by mediating SPP1 through the NF-Kappa B pathway (Retracted article. See vol. 122, 2021)	Ma, SX; Bai, ZF; Wang, W; Wu, HY	2019	Excluded
1482	MYOCARDIAL EXPRESSION OF THE MICRORNA DRE-MIR-133A-5P IS ASSOCIATED WITH IMPROVEMENT IN LEFT VENTRICULAR EJECTION FRACTION IN PATIENTS WITH IDIOPATHIC DILATED CARDIOMYOPATHY TREATED WITH BETA-BLOCKERS	Hinterberg, MA; Kao, D; Karimpour-Fard, A; Sucharov, K; Hunter, LE; Port, D; Bristow, M	2013	Excluded
1485	Increased microRNA-21 gene expression levels as a biomarker of myocardial damage in acute myocarditis	Marketou, M; Kontaraki, J; Konstantinou, J; Maragkoudakis, S; Plevritaki, A; Lempidakis, D; Vougia, D; Fragiadakis, K; Kassotakis, S; Theodosaki, O; Vardas, P; Parthenakis, F	2019	PASS	PASS
1487	A novel miR-371a-5p-mediated pathway, leading to BAG3 upregulation in cardiomyocytes in response to epinephrine, is lost in Takotsubo cardiomyopathy	d'Avenia, M; Citro, R; De Marco, M; Veronese, A; Rosati, A; Visone, R; Leptidis, S; Philippen, L; Vitale, G; Cavallo, A; Silverio, A; Prota, C; Gravina, P; De Cola, A; Carletti, E; Coppola, G; Gallo, S; Provenza, G; Bossone, E; Piscione, F; Hahne, M; De Windt, LJ; Turco, MC; De Laurenzi, V	2015	Excluded
1490	Cardiac-specific microRNA-125b deficiency induces perinatal death and cardiac hypertrophy	Chen, CY; Lee, DS; Choong, OK; Chang, SK; Hsu, T; Nicholson, MW; Liu, LW; Lin, PJ; Ruan, SC; Lin, SW; Hu, CY; Hsieh, PCH	2021	Excluded
1492	Lamin A/C and cardiac diseases	Sylvius, N; Tesson, F	2006	Excluded
1493	Molecular biomarkers in cardiac hypertrophy	Zhu, L; Li, C; Liu, Q; Xu, WT; Zhou, X	2019	Excluded
1494	A unique microRNA profile in end-stage heart failure indicates alterations in specific cardiovascular signaling networks	Prasad, SVN; Gupta, MK; Duan, ZH; Surampudi, VSK; Liu, CG; Kotwal, A; Moravec, CS; Starling, RC; Perez, DM; Sen, S; Wu, QY; Plow, EF; Karnik, S	2017	Excluded
1497	MicroRNA-208b gene expression levels as a biomarkers of left ventricular dysfunction in patients with acute myocarditis	Marketou, M; Kontaraki, J; Fragiadakis, K; Konstantinou, J; Maragkoudakis, S; Lempidakis, D; Plevritaki, A; Plataki, M; Papadaki, S; Vougia, D; Vardas, P; Parthenakis, F	2020	PASS	PASS
1500	ASC-1 Is a Cell Cycle Regulator Associated with Severe and Mild Forms of Myopathy	Villar-Quiles, RN; Catervi, F; Cabet, E; Juntas-Morales, R; Genetti, CA; Gidaro, T; Koparir, A; Yuksel, A; Coppens, S; Deconinck, N; Pierce-Hoffman, E; Lornage, X; Durigneux, J; Laporte, J; Rendu, J; Romero, NB; Beggs, AH; Servais, L; Cossee, M; Olive, M; Bohm, J; Duband-Goulet, I; Ferreiro, A	2020	Excluded
1502	Mitochondrial DNA mutations and age	Ozawa, T	1998	Excluded
1505	Effects of 47C allele (rs4880) of the SOD2 gene in the production of intracellular reactive species in peripheral blood mononuclear cells with and without lipopolysaccharides induction	Paludo, FJO; Bristot, IJ; Alho, CS; Gelain, DP; Moreira, JCF	2014	Excluded
1506	The microRNA 221/222 cluster controls CVB3-induced myocarditis: could tiny microRNAs explain adverse inflammation in the heart?	Heggermont, WA; Corsten, MF; Papageorgiou, AP; Thibaut, HJ; Verhesen, W; Carai, P; Van Leeuwen, R; Neyts, J; Schroen, B; Heymans, S	2013	Excluded
1508	MicroRNA-208a is a regulator of cardiac hypertrophy and conduction in mice	Callis, TE; Pandya, K; Seok, HY; Tang, RH; Tatsuguchi, M; Huang, ZP; Chen, JF; Deng, ZL; Gunn, B; Shumate, J; Willis, MS; Selzman, CH; Wang, DZ	2009	Excluded
1514	Heart Failure and Cardiomyopathies: Clinical and Molecular Aspects in Children	D'Alessandro, R; Limongelli, G; Calabro, P; Maddaloni, V; Ziello, B; Fimiani, F; Pacileo, G; Calabro, R	2012	Excluded
1518	Men with oligoasthenoteratazoospermia harbour higher numbers of multiple mitochondrial DNA deletions in their spermatozoa, but individual deletions are not indicative of overall aetiology	St John, JC; Jokhi, RP; Barratt, CLR	2001	Excluded
1520	Elucidation of transcriptome-wide microRNA binding sites in human cardiac tissues by Ago2 HITS-CLIP	Spengler, RM; Zhang, XM; Cheng, CS; McLendon, JM; Skeie, JM; Johnson, FL; Davidson, BL; Boudreau, RL	2016	Excluded
1522	Signal-Dependent Recruitment of BRD4 to Cardiomyocyte Super-Enhancers Is Suppressed by a MicroRNA	Stratton, MS; Lin, CY; Anand, P; Tatman, PD; Ferguson, BS; Wickers, ST; Ambardekar, AV; Sucharov, CC; Bradner, JE; Haldar, SM; McKinsey, TA	2016	Excluded
1524	Myocardial Expression Levels of Micro-Ribonucleic Acids in Patients With Left Ventricular Assist Devices Signature of Myocardial Recovery, Signature of Reverse Remodeling, or Signature With No Name?	Mann, DL; Burkhoff, D	2011	Excluded
1527	Nuclear Magnetic Resonance Solution Structure of DNA Featuring Clustered 2 '-Deoxyribonolactone and 8-Oxoguanine Lesions	Zalesak, J; Constant, JF; Jourdan, M	2016	Excluded
1530	DETECTION OF ENTEROVIRUSES IN CELL-CULTURES BY USING INSITU TRANSCRIPTION	CARSTENS, JM; TRACY, S; CHAPMAN, NM; GAUNTT, CJ	1992	Excluded
1534	Differential microRNA Expression and Regulation in the Rat Model of Post-Infarction Heart Failure	Liu, XY; Meng, HY; Jiang, C; Yang, SB; Cui, FW; Yang, P	2016	Excluded
1542	Differential Cardiac MicroRNA Expression Predicts the Clinical Course in Human Enterovirus Cardiomyopathy	Kuehl, U; Lassner, D; Gast, M; Stroux, A; Rohde, M; Siegismund, C; Wang, XM; Escher, F; Gross, M; Skurk, C; Tschoepe, C; Loebel, M; Scheibenbogen, C; Schultheiss, HP; Poller, W	2015	PASS	PASS
1552	Cardiac myocyte hypertrophy and proliferating cell nuclear antigen expression in Wistar rats infected with Trypanosoma cruzi	Arnaiz, MR; Fichera, LE; Postan, M	2002	Excluded
1553	Plasma levels of microRNA-21,-126 and-423-5p alter during clinical improvement and are associated with the prognosis of acute heart failure	Schneider, SID; Silvello, D; Martinelli, NC; Garbin, A; Biolo, A; Clausell, N; Andrades, M; Dos Santos, KG; Rohde, LE	2018	Excluded
1554	The role of blood flow and microRNAs in blood vessel development	Liu, D; Krueger, J; Le Noble, F	2011	Excluded
1555	A Novel Artificial MicroRNA Expressing AAV Vector for Phospholamban Silencing in Cardiomyocytes Improves Ca2+ Uptake into the Sarcoplasmic Reticulum.	Grossl, T; Hammer, E; Bien-Moller, S; Geisler, A; Pinkert, S; Roger, C; Poller, W; Kurreck, J; Volker, U; Vetter, R; Fechner, H	2014	Excluded
1557	microRNA overexpression in slow transit constipation leads to reduced Na(V)1.5 current and altered smooth muscle contractility	Mazzone, A; Strege, PR; Gibbons, SJ; Alcaino, C; Joshi, V; Haak, AJ; Tschumperlin, DJ; Bernard, CE; Cima, RR; Larson, DW; Chua, HK; Graham, RP; El Refaey, M; Mohler, PJ; Hayashi, Y; Ordog, T; Calder, S; Du, P; Farrugia, G; Beyder, A	2020	Excluded
1560	Left ventricular assist device-induced reverse remodeling: it's not just about myocardial recovery	Marinescu, KK; Uriel, N; Mann, DL; Burkhoff, D	2017	Excluded
1561	A Novel Cardiomyocyte-enriched MicroRNA, miR-378, Targets Insulin-like Growth Factor 1 Receptor IMPLICATIONS IN POSTNATAL CARDIAC REMODELING AND CELL SURVIVAL	Knezevic, I; Patel, A; Sundaresan, NR; Gupta, MP; Solaro, RJ; Nagalingam, RS; Gupta, M	2012	Excluded
1563	Cardiac-targeted delivery of regulatory RNA molecules and genes for the treatment of heart failure	Poller, W; Hajjar, R; Schultheiss, HP; Fechner, H	2010	Excluded
1565	Taking a good look at free radicals in the aging process	Hekimi, S; Lapointe, J; Wen, Y	2011	Excluded
1566	microRNAs in cardiovascular disease - clinical application	Schulte, C; Karakas, M; Zeller, T	2017	Excluded
1567	Ultrastructural definition of apoptosis in heart failure	Arbustini, E; Brega, A; Narula, J	2008	Excluded
1569	Co-treatment with conjugated linoleic acid and nitrite protects against myocardial infarction	Qipshidze-Kelm, N; Piell, KM; Solinger, JC; Cole, MP	2014	Excluded
1571	The effects of Radix Angelica Sinensis and Radix Hedysari ultrafiltration extract on X-irradiation-induced myocardial fibrosis in rats	Ma, CX; Fu, ZY; Guo, H; Wei, HP; Zhao, XK; Li, YD	2019	Excluded
1574	Cerina: systematic circRNA functional annotation based on integrative analysis of ceRNA interactions	Cardenas, J; Balaji, U; Gu, JH	2020	Excluded
1576	Of the X and the Y-sex-specific differences in patients presenting with acute myocarditis	Schmutzler, L; Mirna, M; Topf, A; Hoppe, U; Lichtenauer, M	2021	Excluded
1578	cAMP induces hypertrophy and alters DNA methylation in HL-1 cardiomyocytes	Fang, XF; Robinson, J; Wang-Hu, J; Jiang, LL; Freeman, DA; Rivkees, SA; Wendler, CC	2015	Excluded
1579	Trimetazidine improves right ventricular function by increasing miR-21 expression	Liu, F; Yin, L; Zhang, LL; Liu, WH; Liu, JJ; Wang, YS; Yu, B	2012	Excluded
1581	Murine Experimental Autoimmune Myocarditis (EAM) is associated with LV hypertrophy but not with reduced LV systolic function	Mirna, MM; Paar, V; Kraus, T; Sotlar, K; Wernly, B; Pistulli, R; Lichtenauer, M	2019	Excluded
1583	Mitochondrial oxidative stress and increased seizure susceptibility in Sod2(-/+) mice	Liang, LP; Patel, M	2004	Excluded
1584	MIR-19B INHIBITS GJA1 AND SYNERGIZES MIR-1 IN VMC	Lin, JY; Xue, AM; Li, LL; Li, BX; Shen, YW; Xu, HF; Zhao, ZQ	2017	Excluded
1586	Neutrophil-to-lymphocyte ratio and monocyte-to-lymphocyte ratio predict length of hospital stay in acute myocarditis	Schmutzler, L; Mirna, M; Topf, A; Hoppe, UC; Lichtenauer, M	2021	Excluded
1590	Diagnostic and prognostic value of circulating microRNAs in heart failure with preserved and reduced ejection fraction	Schulte, C; Westermann, D; Blankenberg, S; Zeller, T	2015	Excluded
1594	miR-185 Plays an Anti-Hypertrophic Role in the Heart via Multiple Targets in the Calcium-Signaling Pathways	Kim, JO; Song, DW; Kwon, EJ; Hong, SE; Song, HK; Min, CK; Kim, DH	2015	Excluded
1597	MicroRNA-30b-5p Is Involved in the Regulation of Cardiac Hypertrophy by Targeting CaMKII delta	He, J; Jiang, S; Li, FL; Zhao, XJ; Chu, EF; Sun, MN; Chen, MZ; Li, H	2013	Excluded
1601	Interleukin-10 Inhibits Bone Marrow Fibroblast Progenitor Cell-Mediated Cardiac Fibrosis in Pressure-Overloaded Myocardium	Verma, SK; Garikipati, VNS; Krishnamurthy, P; Schumacher, SM; Grisanti, LA; Cimini, M; Cheng, ZJ; Khan, M; Yue, YJ; Benedict, C; Truongcao, MM; Rabinowitz, JE; Goukassian, DA; Tilley, D; Koch, WJ; Kishore, R	2017	Excluded
1603	Regulation of Connective Tissue Growth Factor and Cardiac Fibrosis by an SRF/MicroRNA-133a Axis	Angelini, A; Li, ZL; Mericskay, M; Decaux, JF	2015	Excluded
1604	Post-transcriptional Regulation of a-1-Antichymotrypsin by MicroRNA-137 in Chronic Heart Failure and Mechanical Support	Lok, SI; van Mil, A; Bovenschen, N; van der Weide, P; van Kuik, J; van Wichen, D; Peeters, T; Siera, E; Winkens, B; Sluijter, JPG; Doevendans, PA; Martins, PAD; de Jonge, N; de Weger, RA	2013	Excluded
1605	CIC-3-independent sensitivity of apoptosis to Cl- channel blockers in mouse cardiomyocytes	Takahashi, N; Wang, XM; Tanabe, S; Uramoto, H; Jishage, K; Uchida, S; Sasaki, S; Okada, Y	2005	Excluded
1606	Metabolic stress in the myocardium: Adaptations of gene expression	Crawford, PA; Schaffer, JE	2013	Excluded
1607	A new configurational bias scheme for sampling supramolecular structures	De Gernier, R; Curk, T; Dubacheva, GV; Richter, RP; Mognetti, BM	2014	Excluded
1609	Selective Heart Irradiation Induces Cardiac Overexpression of the Pro-hypertrophic miR-212	Sarkozy, M; Gaspar, R; Zvara, A; Kiscsatari, L; Varga, Z; Kovari, B; Kovacs, MG; Szucs, G; Fabian, G; Dioszegi, P; Cserni, G; Puskas, LG; Thum, T; Kahan, Z; Csont, T; Batkai, S	2019	Excluded
1610	Is the Val16Ala manganese superoxide dismutase polymorphism associated with the aging process?	Taufer, M; Peres, A; de Andrade, VM; de Oliveira, G; Sa, G; do Canto, MEP; dos Santos, AR; Bauer, ME; da Cruz, IBM	2005	Excluded
1611	Multifaceted Approach for the Fabrication of Metallomicelles and Metallic Nanoparticles Using Solvophobic Bisdodecylaminepalladium (II) Chloride as Precursor	Chaudhary, GR; Singh, P; Kaur, G; Mehta, SK; Kumar, S; Dilbaghi, N	2015	Excluded
1615	Single-Point Mutations within the Coxsackie B Virus Receptor-Binding Site Promote Resistance against Soluble Virus Receptor Traps	Pinkert, S; Kopp, A; Bruckner, V; Fechner, H; Beling, A	2020	Excluded
1620	Cardiomyopathies and Arrhythmias Induced by Cancer Therapies	Romitan, DM; Radulescu, D; Berindan-Neagoe, I; Stoicescu, L; Grosu, A; Radulescu, L; Gulei, D; Ciuleanu, TE	2020	Excluded
1621	Acute doxorubicin cardiotoxicity is associated with miR-146a-induced inhibition of the neuregulin-ErbB pathway	Horie, T; Ono, K; Nishi, H; Nagao, K; Kinoshita, M; Watanabe, S; Kuwabara, Y; Nakashima, Y; Takanabe-Mori, R; Nishi, E; Hasegawa, K; Kita, T; Kimura, T	2010	Excluded
1623	Integrated Genomic and Network-Based Analyses of Complex Diseases and Human Disease Network	Al-Harazi, O; Al Insaif, S; Al-Ajlan, MA; Kaya, N; Dzimiri, N; Colak, D	2016	Excluded
1624	Current Understanding of the Pathophysiology of Myocardial Fibrosis and Its Quantitative Assessment in Heart Failure	Liu, T; Song, D; Dong, JZ; Zhu, PH; Liu, J; Liu, W; Ma, XH; Zhao, L; Ling, SK	2017	Excluded
1625	Modulation of cytokine-induced cardiac myocyte apoptosis by nitric oxide, Bak, and Bcl-x	Ing, DJ; Zang, J; Dzau, VJ; Webster, KA; Bishopric, NH	1999	Excluded
1626	Selenium-dependent glutathione peroxidases - A highlight of the role of phospholipid hydroperoxide glutathione peroxidase in protection against oxidative damage	Bao, YP; Williamson, G	2000	Excluded
1628	MicroRNAs in Cardiac Diseases	Colpaert, RMW; Calore, M	2019	Excluded
1629	Recent advances in cardiovascular proteomics	Sharma, P; Cosme, J; Gramolini, AO	2013	Excluded
1630	RETRACTED: Astragalus polysaccharide alleviates LPS-induced inflammation injury by regulating miR-127 in H9c2 cardiomyoblasts (Retracted article. See vol. 35, 2021)	Ren, Q; Zhao, SJ; Ren, CJ; Ma, Z	2018	Excluded
1631	miR-375-and miR-1-Regulated Coxsackievirus B3 Has No Pancreas and Heart Toxicity But Strong Antitumor Efficiency in Colorectal Carcinomas	Hazini, A; Dieringer, B; Pryshliak, M; Knoch, KP; Heimann, L; Tolksdorf, B; Pappritz, K; El-Shafeey, M; Solimena, M; Beling, A; Kurreck, J; Klingel, K; Fechner, H	2021	Excluded
1633	Peripartum cardiomyopathy: challenges and solutions	Scardovi, AB; De Maria, R	2017	Excluded
1634	Plasma miRNAs as potential biomarkers of chronic degenerative valvular disease in Dachshunds	Hulanicka, M; Garncarz, M; Parzeniecka-Jaworska, M; Jank, M	2014	Excluded
1635	Archaea Symbiont of T. cruzi Infection May Explain Heart Failure in Chagas Disease	Higuchi, MD; Kawakami, JT; Ikegami, RN; Reis, MM; Pereira, JD; Ianni, BM; Buck, P; Oliveira, LMD; Santos, MHH; Hajjar, LA; Bocchi, EA	2018	Excluded
1637	Optimization of Experimental Parameters to Explore Small-Ligand/Aptamer Interactions through Use of (HNMR)-H-1 Spectroscopy and Molecular Modeling	Souard, F; Perrier, S; Noel, V; Fave, C; Fiore, E; Peyrin, E; Garcia, J; Vanhaverbeke, C	2015	Excluded
1638	Nuclear pore rearrangements and nuclear trafficking in cardiomyocytes from rat and human failing hearts	Chahine, MN; Mioulane, M; Sikkel, MB; O'Gara, P; Dos Remedios, CG; Pierce, GN; Lyon, AR; Foldes, G; Harding, SE	2015	Excluded
1639	miRNAs in enterovirus infection	Engelmann, I; Alidjinou, EK; Bertin, A; Sane, F; Hober, D	2018	Excluded
1640	MicroRNAs: Redefining Mechanisms in Cardiac Disease	Dorn, GW	2010	Excluded
1641	Viral distribution and lesions in Kunming mice experimentally infected with porcine circovirus type 2b	Deng, ZB; Wang, ND; Xu, DJ; Yuan, AW; Ge, M; Luo, W; Xue, LQ; Yu, XL	2011	Excluded
1642	Perinatal inflammation induces sex-related differences in cardiovascular morbidities in mice	Velten, M; Heyob, KM; Wold, LE; Rogers, LK	2018	Excluded
1644	Consensus Transcriptional Landscape of Human End-Stage Heart Failure	Flores, ROR; Lanzer, JD; Holland, CH; Leuschner, F; Most, P; Schultz, JH; Levinson, RT; Saez-Rodriguez, J	2021	Excluded
1646	Elevated miR-499 Levels Blunt the Cardiac Stress Response	Shieh, JTC; Huang, Y; Gilmore, J; Srivastava, D	2011	Excluded
1647	Efficient Molybdenum Hydrazonato Epoxidation Catalysts Operating under Green Chemistry Conditions: Water vs. Decane Competition	Mrkonja, S; Topic, E; Mandaric, M; Agustin, D; Pisk, J	2021	Excluded
1648	Laminopathy-inducing lamin A mutants can induce redistribution of lamin binding proteins into nuclear aggregates	Hubner, S; Eam, JE; Hubner, A; Jans, DA	2005	Excluded
1649	Cardiac Thyroid Hormone Metabolism and Heart Failure	Janssen, R; Muller, A; Simonides, WS	2017	Excluded
1651	Electrochemical parameters and techniques in drug development, with an emphasis on quinones and related compounds	Hillard, EA; de Abreu, FC; Ferreira, DCM; Jaouen, G; Goulart, MOF; Amatore, C	2008	Excluded
1652	Cardiac Response to Oxidative Stress Induced by Mitochondrial Dysfunction	Kim, HK; Nilius, B; Kim, N; Ko, KS; Rhee, BD; Han, J	2016	Excluded
1653	RNAi-based Gene Therapy for Dominant Limb Girdle Muscular Dystrophies	Liu, J; Harper, SQ	2012	Excluded
1654	In vivo forced expression of myocardin in ventricular myocardium transiently impairs systolic performance in early neonatal pig heart	Torrado, M; Centeno, A; Lopez, E; Mikhailov, AT	2009	Excluded
1656	Development of Novel Cardiovascular Therapeutics From Small Regulatory RNA Molecules - An Outline of Key Requirements	Poller, W; Fechner, H	2010	Excluded
1657	Genomics, Transcriptional Profiling, and Heart Failure	Margulies, KB; Bednarik, DP; Dries, DL	2009	Excluded
1658	Extra- and intracellular factors regulating cardiomyocyte proliferation in postnatal life	Zacchigna, S; Giacca, M	2014	Excluded
1659	Anatomy and evolution of telomeric and subtelomeric regions in the human protozoan parasite Trypanosoma cruzi	Barros, RRM; Marini, MM; Antonio, CR; Cortez, DR; Miyake, AM; Lima, FM; Ruiz, JC; Bartholomeu, DC; Chiurillo, MA; Ramirez, JL; da Silveira, JF	2012	Excluded
1660	Cardiac Gene Transfer of Short Hairpin RNA Directed Against Phospholamban Effectively Knocks Down Gene Expression but Causes Cellular Toxicity in Canines	Bish, LT; Sleeper, MM; Reynolds, C; Gazzara, J; Withnall, E; Singletary, GE; Buchlis, G; Hui, D; High, KA; Gao, GP; Wilson, JM; Sweeney, HL	2011	Excluded
1661	miR-206 Mediates YAP-Induced Cardiac Hypertrophy and Survival	Yang, YF; Del Re, DP; Nakano, N; Sciarretta, S; Zhai, PY; Park, J; Sayed, D; Shirakabe, A; Matsushima, S; Park, Y; Tian, B; Abdellatif, M; Sadoshima, J	2015	Excluded
1663	Long-Term Cardiac-Targeted RNA Interference for the Treatment of Heart Failure Restores Cardiac Function and Reduces Pathological Hypertrophy	Suckau, L; Fechner, H; Chemaly, E; Krohn, S; Hadri, L; Kockskamper, J; Westermann, D; Bisping, E; Ly, H; Wang, XM; Kawase, Y; Chen, JQ; Liang, LF; Sipo, I; Vetter, R; Weger, S; Kurreck, J; Erdmann, V; Tschope, C; Pieske, B; Lebeche, D; Schultheiss, HP; Hajjar, RJ; Poller, WC	2009	Excluded
1664	Accelerated mitochondrial adenosine diphosphate/adenosine triphosphate transport improves hypertension-induced heart disease	Walther, T; Tschope, C; Sterner-Kock, A; Westermann, D; Heringer-Walther, S; Riad, A; Nikolic, A; Wang, Y; Ebermann, L; Siems, WE; Bader, M; Shakibaei, M; Schultheiss, HP; Dorner, A	2007	Excluded
1665	Biventricular Pacing Cardiac Contractility Modulation Improves Cardiac Contractile Function via Upregulating SERCA2 and miR-133 in a Rabbit Model of Congestive Heart Failure	Ning, B; Qi, XY; Li, YX; Liu, HL; Zhang, FF; Qin, C	2014	Excluded
1666	Cloning, expression, and bioinformatics analysis of the sheep CARP gene	Ma, GD; Wang, HY; Li, Y; Cui, LL; Cui, YD; Li, QZ; Li, KS; Zhao, B	2013	Excluded
1667	Left Atrial Transcriptional Changes Associated With Atrial Fibrillation Susceptibility and Persistence	Deshmukh, A; Barnard, J; Sun, H; Newton, D; Castel, L; Pettersson, G; Johnston, D; Roselli, E; Gillinov, AM; McCurry, K; Moravec, C; Smith, JD; Van Wagoner, DR; Chung, MK	2015	Excluded
1668	Suppression of Inflammatory Cardiac Cytokine Network in Rats with Untreated Obesity and Pre-Diabetes by AT2 Receptor Agonist NP-6A4	Gavini, MP; Mahmood, A; Belenchia, AM; Beauparlant, P; Kumar, SA; Ardhanari, S; DeMarco, VG; Pulakat, L	2021	Excluded
1669	Na/K-ATPase signaling mediates miR-29b-3p regulation and cardiac fibrosis formation in mice with chronic kidney disease	Drummond, CA; Fan, XM; Haller, ST; Kennedy, DJ; Liu, J; Tian, J	2018	Excluded
1670	A potential risk factor of essential hypertension in case-control study: MicroRNAs miR-10a-5p	Luo, YZ; Bao, XJ; Zheng, SY; Gu, TL; Mao, SQ; Liu, SK; Sun, JH; Huang, MY; Zhang, LN	2020	Excluded
1671	Somatic mtDNA mutations cause aging phenotypes without affecting reactive oxygen species production	Trifunovic, A; Hansson, A; Wredenberg, A; Rovio, AT; Dufour, E; Khvorostov, I; Spelbrink, JN; Wibom, R; Jacobs, HT; Larsson, NG	2005	Excluded
1672	Optimization of High Resolution Melting (HRM) Method for Genotyping and Estimating Frequency of SNP rs4284505 in the Vietnamese Breast Cancer	Le, NHM; Nga, NT; Giang, NDT; Thanh, NTN; Hue, NT	2020	Excluded
1673	Long-Term Neuroanatomical Consequences of Childhood Maltreatment: Reduced Amygdala Inhibition by Medial Prefrontal Cortex	Kessler, R; Schmitt, S; Sauder, T; Stein, F; Yuksel, D; Grotegerd, D; Dannlowski, U; Hahn, T; Dempfle, A; Sommer, J; Steinstrater, O; Nenadic, I; Kircher, T; Jansen, A	2020	Excluded
1674	ETB receptor dependent alteration in aortic responses to ET-1 in the cardiomyopathic hamster	Al-Khoury, J; Bkaily, G; Chahine, M; Jacques, D; D'Orleans-Juste, P	2006	Excluded
1675	New Mechanistic and Therapeutic Targets for Pediatric Heart Failure Report From a National Heart, Lung, and Blood Institute Working Group	Burns, KM; Byrne, BJ; Gelb, BD; Kuhn, B; Leinwand, LA; Mital, S; Pearson, GD; Rodefeld, M; Rossano, JW; Stauffer, BL; Taylor, MD; Towbin, JA; Redington, AN	2014	Excluded
1676	Transgenic over-expression of YY1 induces pathologic cardiac hypertrophy in a sex-specific manner	Stauffer, BL; Dockstader, K; Russell, G; Hijmans, J; Walker, L; Cecil, M; Demos-Davies, K; Medway, A; McKinsey, TA; Sucharov, CC	2015	Excluded
1677	Rheostatic Regulation of the SERCA/Phospholamban Membrane Protein Complex Using Non-Coding RNA and Single-Stranded DNA oligonucleotides	Soller, KJ; Verardi, R; Jing, M; Abrol, N; Yang, J; Walsh, N; Vostrikov, VV; Robia, SL; Bowser, MT; Veglia, G	2015	Excluded
1678	Gene Profiling of the Failing Heart: Epigenetics	Marin-Garcia, J	2010	Excluded
1679	Some Insights into the Regulation of Cardiac Physiology and Pathology by the Hippo Pathway	Ramaccini, D; Pedriali, G; Perrone, M; Bouhamida, E; Modesti, L; Wieckowski, MR; Giorgi, C; Pinton, P; Morciano, G	2022	Excluded
1680	The Clinical Potential of Heart Failure-Related miRNAs	Tijsen, AJ; Pinto, YM; Creemers, EE	2017	Excluded
1681	Potential role of cervicovaginal extracellular particles in diagnosis of endometriosis	Muth, DC; McAlexander, MA; Ostrenga, LJ; Pate, NM; Izzi, JM; Adams, RJ; Pate, KAM; Beck, SE; Karim, BO; Witwer, KW	2015	Excluded
1682	miRNAs in Cardiac Hypertrophy and Heart Failure	Wang, ZG	2010	Excluded
1683	Influenza virus replication in cardiomyocytes drives heart dysfunction and fibrosis	Kenney, AD; Aron, SL; Gilbert, C; Kumar, N; Chen, P; Eddy, A; Zhang, LZ; Zani, A; Vargas-Maldonado, N; Speaks, S; Kawahara, J; Denz, PJ; Dorn, L; Accornero, F; Ma, JJ; Zhu, H; Rajaram, MVS; Cai, CX; Langlois, RA; Yount, JS	2022	Excluded
1684	Noncoding RNAs in Cardiovascular Biology and Disease	Gurha, P; Marian, AJ	2013	Excluded
1685	IL-4 absence triggers distinct pathways in apical periodontitis development	Freire, MS; Oliveira, NG; Lima, SMF; Porto, WF; Martins, DCM; Silva, ON; Chaves, SB; Sousa, MV; Ricart, CAO; Castro, MS; Fontes, W; Franco, OL; Rezende, TMB	2021	Excluded
1686	The use of host defense peptides in root canal therapy in rats	Lima, SMF; Freire, MS; Cantuaria, APC; Martins, DCM; Amorim, IA; Dantas, EMGL; Farias, JO; Castro, MB; Silva, JS; Barriviera, FA; Barriviera, M; Almeida, JA; Uehara, IA; Silva, MJB; Oliveira, APL; Silva, ON; Hancock, REW; Franco, OL; Rezende, TMB	2021	Excluded
1687	A20 (TNFAIP3) alleviates viral myocarditis through ADAR1/miR-1a-3p-dependent regulation	Li B., Xie X.	2022	Excluded
1692	Melatonin Alleviates Hyperglycemia-Induced Cardiomyocyte Apoptosis via Regulation of Long Non-Coding RNA H19/miR-29c/MAPK Axis in Diabetic Cardiomyopathy	Tang H., Zhong H., Liu W., Wang Y., Wang Y., Wang L., Tang S., Zhu H.	2022	Excluded
1694	PKN2 deficiency leads both to prenatal congenital cardiomyopathy and defective angiotensin II stress responses	Marshall J.J., Cull J.J., Alharbi H.O., Zaw Thin M., Cooper S.T., Barrington C., Vanyai H., Snoeks T., Siow B., Suaarez-Bonnet A., Herbert E., Stuckey D.J., Cameron A., Prin F., Cook A.C., Priestnall S.L., Chotani S., Rackham O.J., Meijles D., Mohun T., Clerk A., Parker P.J.	2022	Excluded
1714	Enhancement of LncRNA-HFRL expression induces cardiomyocyte inflammation, proliferation, and fibrosis via the sequestering of miR-149-5p-mediated collagen 22A inhibition	Li X., Teng Y., Tian M., Qiu H., Zhao J., Gao Q., Zhang Y., Zhuang J., Chen J.	2022	Excluded
1719	Cancerinformaticssurvey of different grades and subtypes of glioma	Kaur P.	2022	Excluded
1723	AGING AND OA INDUCE SIMILAR DNA METHYLATION SHIFTS WITHIN MURINE CARTILAGE	Dunn C., Izda V., Garman C., Schlupp L., Prinz E., Jeffries M.	2022	Excluded
1730	Reported Adverse Effects and Attitudes among Arab Populations Following COVID-19 Vaccination: A Large-Scale Multinational Study Implementing Machine Learning Tools in Predicting Post-Vaccination Adverse Effects Based on Predisposing Factors	Hatmal M.M., Al-Hatamleh M.A.I., Olaimat A.N., Mohamud R., Fawaz M., Kateeb E.T., Alkhairy O.K., Tayyem R., Lounis M., Al-Raeei M., Dana R.K., Al-Ameer H.J., Taha M.O., Bindayna K.M.	2022	Excluded
1731	Heterozygous LMNA mutation-carrying iPSC lines from three cardiac laminopathy patients	Cho S., Lee C., Lai C., Zhuge Y., Haddad F., Fowler M., Sallam K., Wu J.C.	2022	Excluded
1736	Long-Term Culture of Patient-Derived Cardiac Organoids Recapitulated Duchenne Muscular Dystrophy Cardiomyopathy and Disease Progression	Marini V., Marino F., Aliberti F., Giarratana N., Pozzo E., Duelen R., Calabuig Á.C., Larovere R., Vervliet T., Torella D., Bultynck G., Sampaolesi M., Chai Y.C.	2022	Excluded
1741	Heart Failure after Cardiac Surgery: The Role of Halogenated Agents, Myocardial Conditioning and Oxidative Stress	Guerrero-Orriach J.L., Carmona-Luque M.D., Gonzalez-Alvarez L.	2022	Excluded
1754	First report of fatty acids in Mimosa diplotricha bee pollen with in vitro lipase inhibitory activity	Khongkarat P., Traiyasut P., Phuwapraisirisan P., Chanchao C.	2022	Excluded
1758	Preliminary evidence for the presence of multiple forms of cell death in diabetes cardiomyopathy	Wei J., Zhao Y., Liang H., Du W., Wang L.	2022	Excluded
1771	Neoadjuvant nivolumab (N) +/-ipilimumab (I) in cisplatin-ineligible patients (pts) with muscle-invasive bladder cancer (MIBC)	Guercio B.J., Pietzak E.J., Brown S., Chen J.-F., Peters V., Regazzi A.M., Aggen D.H., Donahue T.F., Goh A.C., Cha E.K., Donat S.M., Dalbagni G., Bochner B.H., Funt S.A., Bajorin D.F., Iyer G., Ostrovnaya I., Al-Ahmadie H.A., Rosenberg J.E., Teo M.Y.	2022	Excluded
1773	Integrative Transcriptomics and Proteomics Analyses to Reveal the Developmental Regulation of Metorchis orientalis: A Neglected Trematode With Potential Carcinogenic Implications	Gao J.-F., Lv Q.-B., Mao R.-F., Sun Y.-Y., Chen Y.-Y., Qiu Y.-Y., Chang Q.-C., Wang C.-R.	2021	Excluded
1784	The MicroRNA Days: The COVID-19 Pandemic from the Point of View of Short RNAs	Izzotti A.	2021	Excluded
1785	Effectiveness of Belimumab After Rituximab in Systemic Lupus Erythematosus A Randomized Controlled Trial	Shipa M., Embleton-Thirsk A., Parvaz M., Santos L.R., Muller P., Chowdhury K., Isenberg D.A., Doré C.J., Gordon C., Ehrenstein M.R., D'Cruz D.P., Jordan N., Parker B., Lightstone L., Salama A., Hamour S., Pyne D., Edwards C.J., Griffiths B., Vital E.M., Rhodes B., Yee C.-S., Akil M., Topham P., Gullick N.J.	2021	Excluded
1798	Altered myocardial gene expression in H2-KBM1 mice with orexinergic dysfunction and heart failure	Stoller D., Dhar K., Basma H., Bonasera S.J., Lowes B.D.	2021	Excluded
1806	Noninvasive diagnosis of myocarditis with microRNA		2021	Excluded
1807	Rationale for CDR132L, an antisense inhibitor of miR-132, for a novel therapy for ventricular remodelling after myocardial infarction	Aimo A., Iborra Egea O., Bayes-Genis A., PASSino C., Emdin M.	2021	Excluded
1825	Critical crosstalk between oxidative stress and re stress in ischemic dilated cardiomyopathy (IDCM)	Toro R., Calderon M., Muñiz-Grijalvo O., Pacheco G., Belmonte T., Rodriguez-Leal C., Daroca T., Bermudez A., Montelongo M.D.C., Mangas A.	2021	Excluded
1826	miR-16 role in apoptosis, inflammation and endoplasmatic reticulum stress in ischemic dilated cardiomyopathy	Toro R., Muñiz-Grijalvo O., Calderon M., Quezada-Feijoo M., Ramos M., Belmonte T., Pacheco G., Mangas A.	2021	PASS	No text
1830	Relationship between oxidative stress and nuclear factor-erythroid-2-related factor 2 signaling in diabetic cardiomyopathy (Review)	Wu X., Huang L., Liu J.	2021	Excluded
1833	COVID-19 mRNA vaccine and myocarditis	Singh B., Kaur P., Cedeno L., Brahimi T., Patel P., Virk H., Shamoon F., Bikkina M.	2021	Excluded
1843	MYCOBACTERIUM CHIMAERA BIOPROSTHETIC AORTIC VALVE ENDOCARDITIS MIMICKING SYSTEMIC SARCOIDOSIS	Shabtaie S., Sharain K., AbouEzzeddine O.F.	2021	Excluded
1844	Coxsackievirus b3—its potential as an oncolytic virus	Geisler A., Hazini A., Heimann L., Kurreck J., Fechner H.	2021	Excluded
1847	Ectopic Expression of miR-424(322)/503 Triggers Acute and Reversible Dilated Cardiomyopathy	Shrestha S., Shen X., Liang R., Wang F., Rajput J., McConnell B., Liu Y.	2021	Excluded
1853	A case of combined oxidative phosphorylation deficiency 5 with prenatal onset	Levandoski K., Sigdel M., Benito C., Day-Salvatore D.-L.	2021	Excluded
1856	HLA-DRB1 mismatch-based identification of donor-derived cell free DNA (DD-cfDNA) as a marker of rejection in heart transplant recipients	Sorbini M., Togliatto G., Simonato E., Boffini M., Cappuccio M., Gambella A., Arruga F., Mora N., Marro M., Caorsi C., Mansouri M., Magistroni P., Delsedime L., Papotti M.G., Amoroso A., Rinaldi M., Vaisitti T., Deaglio S.	2021	Excluded
1868	A mitochondrial etiology of complex diseases	Wallace D.C.	2021	Excluded
1870	Factors associated with severe SARS-CoV-2 infection	Ouldali N., Yang D.D., Madhi F., Levy M., Gaschignard J., Craiu I., Guiddir T., Schweitzer C., Wiedemann A., Lorrot M., Romain A.-S., Garraffo A., Haas H., Rouget S., de Pontual L., Aupiais C., Martinot A., Toubiana J., Dupic L., Minodier P., PASSard M., Belot A., Levy C., Béchet S., Jung C., Sarakbi M., Ducrocq S., Danekova N., Jhaouat I., Vignaud O., Garrec N., Caron E., Cohen R., Gajdos V., An…	2021	Excluded
1879	86 Amniotic fluid microRNA profiles in twin-twin transfusion syndrome with and without severe cardiomyopathy	Willner E.C., Galan H.L., Neltner B., Hoffman H.A., Karimpour-Fard A., Miyamoto S.D., Sucharov C.C.	2021	Excluded
1895	Targeted disruption of the histone lysine 79 methyltransferase Dot1L in nephron progenitors causes congenital renal dysplasia	Wang F., Ngo J., Li Y., Liu H., Chen C.-H., Saifudeen Z., Sequeira-Lopez M.L.S., El-Dahr S.S.	2021	Excluded
1913	Profiling of circulating miRNAs in canines with heart murmur and associated valvular cardiovascular disorder	Tavener S.K., Badri D.V., Panickar K.S.	2021	Excluded
1926	An Approach to Study Shape-Dependent Transcriptomics at a Single Cell Level	Haftbaradaran Esfahani P., Knöll R.	2020	Excluded
1934	Exosomes from Dilated Cardiomyocytes Activate Fibrosis	Fu X., Jang J., Gunasekaran M., Sharma S., Mishra R., Saha P., Abdullah M., Wang L., Arfat M.Y., Li D., Kaushal S.	2020	Excluded
1939	Expression of miR-495 and miR-326 in peripheral blood of rheumatoid arthritis patients and its significance	Sui X., Liu H., Zhou Y.	2020	Excluded
1942	Familial dilated cardiomyopathy: Translational approach through peripheral microRNAs	Belmonte Garcia T., Calderon-Dominguez M., Ramos M., Quezada-Feijoo M., Rodriguez-Leal C., Gomez S., Mangas A., Toro R.	2020	Excluded
1951	Extracellular miR-146a-5p Induces Cardiac Innate Immune Response and Cardiomyocyte Dysfunction	Shimada B.K., Yang Y., Zhu J., Wang S., Suen A., Kronstadt S.M., Jeyaram A., Jay S.M., Zou L., Chao W.	2020	Excluded
1960	Towards precision disease-modelling in experimental myocarditis	Protonotarios A., Marelli-Berg F.	2020	Excluded
1964	Bioreducible, branched poly(β-amino ester)s mediate anti-inflammatory ICAM-1 siRNA delivery against myocardial ischemia reperfusion (IR) injury	Wang X., Liang Q., Mao Y., Zhang R., Deng Q., Chen Y., Zhu R., Duan S., Yin L.	2020	Excluded
1972	Transcriptional and free radical responses to LVAD therapy	Dhar K., Kc A., Qiu F., Basma H., Savalia K.K., Jones J., Moulton A.M., Zimmerman M.C., Um J., Anderson D., Hyden M., Lowes B.D.	2020	Excluded
1983	Diagnostic and prognostic role of micro RNA 208 in patients undergoing primary percutaneous coronary intervention	Baraka K., Hamdy A., Rabeaa A., Hamdy L., Mostafa A.	2020	Excluded
2012	002 Titin Truncation Provides a Sensitised Template for Cardio-Depressant Effects of Alcohol	Santiago C., Chand R., Humphreys D., Young P., Ward A., Huttner I., Fatkin D.	2020	Excluded
2023	Myocardial tissue and circulating micrornas to recognize arrhythmogenic cardiomyopathy phenotypic complexity	Marinas M.B., Celeghin R., Cason M., Bariani R., Frigo A.C., Bauce B., Thiene G., Basso C., Pilichou K.	2019	Excluded
2035	Epigenetic regulation by micrornas in pathophysiology of diabetic cardiomyopathy	Lopes M.B., De Freitas R.C.C., Silva F.S., Abreu B.J., De Rezende A.A., Diniz G.P., Bortolin R.H., Luchessi A.D.	2019	Excluded
2036	Exosomes mediate myocardial regeneration of cardiac progenitor cells in a swine model of dilated cardiomyopathy	Hirai K., Goto T., Ousaka D., Ohtsuki S., Oh H.	2019	Excluded
2037	Epigenetic changes in heart failure cohorts: Novel insights into methylation changes of protein and RNA coding genes in human cardiac tissue	Glezeva N., Moran B., Collier P., Moravec C., Phelan D., Donnellan E., Russell-Hallinan A., O'connor D., Gallagher W., Gallagher J., McDonald K., Ledwidge M., Baugh J., Das S., Watson C.	2019	PASS	No text
2038	Deficiency of the long noncoding RNA NEAT1 disturbs T cell and monocyte-macrophage lineage differentiation and functions and results in systemic inflammation with high circulating interferon levels	Poller W., Haghikia A., Gast M., Nakagawa S., Rauch B., Schmidt D., Schumann P., Hirose T., Kuehl A., Landmesser U.	2019	Excluded
2039	Circulating long non-coding RNA ENST00000507296 is a prognostic indicator in patients with dilated cardiomyopathy	Chen C., Zhang X.D., Wang D.W.	2019	Excluded
2040	CircRNAs deregulation in heart failure patients	Greco S., Made A., Longo M., Tikhomirov R., Castelvecchio S., Menicanti L., Martelli F.	2019	Excluded
2043	Development of human intestinal organoids as an antiviral evaluation platform for enteroviruses	Chan J.F.-W., Tsang J., Zhou J., Zhao X., Yuen K.-Y.	2019	Excluded
2044	Long non-coding RNA AK085865 ablation confers susceptibility to viral myocarditis by regulating macrophage polarization	Zhang Y., Li X., Kong X., Zhang M., Wang D., Liu Y., Lv K.	2019	Excluded
2045	Whole exome sequencing of Chagas disease cardiomyopathy families reveals accumulation of rare variants in mitochondrial and inflammation-associated genes	Cunha-Neto E., Marquet S., Farage Frade A., Mota Ferreira A., Ouarhache M., Ianni B., Rodrigues Pinto Ferreira L., Oliveira-Carvalho Rigaud V., Ribeiro Almeida R., Cândido D., Torres M., Gallardo F., Fernandes R., Mady C., Buck P., Cardoso C., Santos-Junior O.R., Oliveira L.C., Oliveira C.D.L., Do Carmo Nunes M., Abel L., Kalil J., Ribeiro A.L.P., Sabino E.C., Chevillard C.	2019	Excluded
2052	Genomic identification of key circRNAs in healthy and dilated cardiomyopathy human heart	Dong K., He X., Su H., Xin H., Zhou J.	2019	PASS	No text
2053	Successful orthotopic heart transplantation in CPTII deficiency	Arnold G.L., McCracken E., Vockley J., Feingold B.	2019	Excluded
2058	Neonatal and adult cardiac transcriptome analysis reveals distinct mechanisms in noncompaction dilated cardiomyopathy development induced by p.k69r-MLP (muscle lim protein) mutation in vivo	Purevjav E., Xu F., Munkhsaikhan U., Alberson N., Sabau R., Lu L., Towbin J.A.	2019	Excluded
2059	Reactivation of fetal MicroRNAs contribute to dilated cardiomyopathy	Shrestha S., Shen X., Liang R., Wang F., McConnell B.K., Liu Y.	2019	Excluded
2060	Targeting the highly abundant circular RNA, circHeart, in cardiomyocytes attenuates pressure overload induced hypertrophy	Lim T.B.	2019	Excluded
2066	Long-term transfusion freedom in MDS del(5q) after stopping lenalidomide treatment	Ebeling F., Illman J., Rasanen A., Partanen A.	2019	Excluded
2068	MicroRNAs expression profile in advanced heart failure patients: Perspectives for risk stratification	Alessandro Galluzzo A., Gallo S., Pardini B., Celentani D., Boretto P., Birolo G., Gatti S., Volpe A., Spilinga M., Pidello S., Matullo G., Bergerone S., Crepaldi T.	2019	Excluded
2072	Role of glutamatergic excitotoxicity in neuromyelitis optica spectrum disorders	Da Silva A.P.B., Souza D.G., Souza D.O., Machado D.C., Sato D.K.	2019	Excluded
2079	Identification of intronic dna sequences regulating titin expression in a dilated cardiomyopathy human induced pluripotent stem cell model	Schmid M., Sharma A., Seidman C.E., Seidman J., Toepfer C., Wolf C., Ewert P.	2019	Excluded
2080	Reference ranges donor-derived cell-free DNA in a heart transplant population	Kao A., Dholakia S., Deng M.	2019	Excluded
2081	MicroRNA expression profiles in a human induced pluripotent stem cell-derived model of diabetic cardiomyopathy	Mishra M.K., Horikoshi Y., Pan X., Liu P., Bai X., Bosnjak Z.J., Kriegel A.J., Liang M.	2019	Excluded
2098	GCN2 deficiency ameliorates cardiac dysfunction in diabetic mice by reducing lipotoxicity and oxidative stress	Feng W., Lei T., Wang Y., Feng R., Yuan J., Shen X., Wu Y., Gao J., Ding W., Lu Z.	2019	Excluded
2101	Lethal encounters: The evolving spectrum of amoebic meningoencephalitis	Gompf S.G., Garcia C.	2019	Excluded
2108	Response to pembrolizumab in lung squamous cell carcinoma with PD-L1 overexpression and egfr rare mutation: A case report	Zhang H.-T., Zeng S.-W., Li L.-Z., Fang C.-T., Zhuang J.-N., Li J., Tang X.-L., Huang M.-L., Ji J.	2019	Excluded
2119	Myocardial microRNA-133 is associated with left ventricle reverse remodeling in dilated cardiomyopathy	Dziewiecka E.M., Toton-Zuranska J., Wisniowska-Smialek S., Kolton-Wroz M., Wolkow P., Holcman K., Khachatryan L., Karabinowska A., Szymonowicz M., Podolec P., Rubis P.	2019	PASS	No text
2120	Comprehensive analysis of aging-related micrornas and mrnas within the human heart and blood	Zhao J., Fan Q.	2019	PASS	No text
2122	LncExACT1 inhibition induces physiological cardiac growth and protects against heart failure	Li H., Liu X., Xiao C., Li G., Yeri A., Ambardekar A.V., Buttrick P.M., Bristow M.R., Rosenzweig A.	2019	Excluded
2129	Novel safe and effective oncolytic virotherapy by miRNA-regulation	Jia Y., Tani K., Shimizu H., Hijikata Y., Miura Y., Soda Y., Takishima Y., Sagara M., Hirose L., Miyamoto S.	2018	Excluded
2130	4-HNE-mediated post-translational modulation of DICER in heart failure	Kiyuna L., MacRae I.J., Chen C.-H., Mochly-Rosen D., Ferreira J.C.	2018	Excluded
2132	Trans septal balloon atrial septostomy for left heart decompression during mechanical circulatory support with va ECMO as a “bridge to re-transplantation”	Suganya S., Rajaraman A.	2018	Excluded
2147	Helicobacter saguini causes multigenerational inflammatory bowel disease in C57/129 IL-10(-/-) mice	Mannion A., Shen Z., Feng Y., Puglisi D., Muthupalani S., Whary M.T., Fox J.G.	2018	Excluded
2148	Associations between myocardial fibrosis-linked microRNAs and serum markers of fibrosis in dilated cardiomyopathy	Rubis P., Toton-Zuranska J., Wisniowska-Smiałek S., Dziewiecka E., Holcman K., Khachatryan L., Szymonowicz M., Karabinowska A., Wypasek E., Kolton-Wróz M., Wołkow P., Podolec P.	2018	Excluded
2149	Circulating and myocardial microRNAs miR-133 and miR-30 are predictors of left ventricle reverse remodelling in dilated cardiomyopathy	Dziewiecka E., Toton-Zuranska J., Wisniowska-Smiałek S., Kołton-Wróz M., Wolkow P., Holcman K., Khachatryan L., Karabinowska A., Szymonowicz M., Podolec P., Rubis P.	2018	PASS	No text
2155	Regulation of NADPH oxidases in tachycardia-induced heart failure	Heinzmann D., Mueller K., Klingel K., Kumbrink J., Kirchner T., Gawaz M., Seizer P.	2018	Excluded
2156	Suppression of miR-127-3p prevents cardiac fibrosis	Zhou Q., Liu Z., Bei Y., Zhang Z., Zhou L., Xiao J.	2018	PASS	No text
2157	Genomic structural variations analysis in dilated cardiomyopathy detects cardiac dysregulation of important RNA species	Haas J.H., Mester S.M., Lai A.L., Frese K.S.F., Sedaghat-Hamedani F.S.H., Kayvanpour E.K., Boeckel J.N.B., Amr A.A., Dietrich C.D., Bordalo D.M.B., Korbel J.K., Keller A.K., Katus H.A.K., Posch A.P., Meder B.M.	2018	Excluded
2163	Long noncoding RNA ZFAS1 in diabetic cardiomyopathy	Feng B., Chen S., Chakrabarti S.	2018	Excluded
2170	Anthracycline Use for Early Stage Breast Cancer in the Modern Era: a Review	Jasra S., Anampa J.	2018	Excluded
2176	A rare combination of two genetic cardiomyopathy (arrhythmogenic right ventricular dysplasia and left ventricular noncompaction) and the role of myocarditis in disease progression	Olga Blagova O.V., Nedostup A.V., Kogan E.A., Lutochina Y.A., Varionchik N.V., Pavlenko E.V., Alexandrova S.A., Shestak A.G., Zaklyazminskaya E.V.	2018	Excluded
2177	Circulating miR-489 as a useful biomarker for DCM	Tomoya Ishiguro T., Hayashi M., Fujiwara W., Izawa H., Okumura S., Sugishita Y., Yoshinaga M., Yamada R.	2018	PASS	No text
2179	The MiR-221/-222 cluster is elevated both in biopsies of patients with myocarditis and idiopathic non-ischemic cardiomyopathy but fails to discriminate between both pathologies	Heggermont W.A., Delrue L., Dierckx R., Dierickx K., Verstreken S., Goethals M., Bartunek J., Vanderheyden M.	2018	PASS	PASS
2181	Circulating hsa-miR-Chr8:96 as the first non-invasive biomarker for the diagnosis of acute myocarditis	Blanco-Dominguez R., Sánchez-Díaz R., Linillos-Pradillo B., Alonso F., Martínez-León A., Bueno H., Fernandez-Friera L., Ibáñez B., Sánchez-Madrid F., Martín P.	2018	Excluded
2182	Novel microrna engineered oncolytic virotherapy for clinical trial	Jia Y., Miyamoto S., Hirose L., Sagara M., Takishima Y., Shimizu H., Tani K.	2018	Excluded
2185	Peripartum cardiomyopathy: A little known disease	Scardovi A.B., de Maria R.	2018	Excluded
2187	Myosin binding protein-H like is a novel myofilament component implicated in arrhythmia and dilated cardiomyopathy	Barefield D.Y., Puckelwartz M.J., Kim E.Y., Wilsbacher L.D., Dellefave-Castillo L., Pesce L.L., McNally E.M.	2018	Excluded
2189	Cardiac specificmicroRNA-125b deficiency impairsmitochondrial function in mouse neonatal and adult heart	Chen C.Y., Lee D.S., Hsieh P.C.	2018	Excluded
2195	Global gene expression analysis of cell free RNA in amniotic fluid from women destined to develop preeclampsia	Jung Y., Lee M.J., Hong K.R., Shin Y.J., Shim S.H., Cha D.H.	2018	Excluded
2204	MiR-29b regulates cardiomyocytes proliferation via targeting NOTCH2	Yang Q., Gui Y.H., Li Q.	2018	Excluded
2206	Differential expression of long noncoding rnas in cocaine and hiv-1 tat treated pulmonary smooth muscle cells	Chinnappan M., Mohan A., Chalise P., Koestler D., Dhillon N.K.	2018	Excluded
2208	International Academy of Cardiology Annual Scientific Sessions 2018 23rd World Congress on Heart Disease		2018	Excluded
2217	Microrna-125b-5p protects the heart from acute myocardial infarction by repressing pro-apoptotic bak1 and Klf13 in cardiomyocytes	Aonuma T., Bayoumi A.S., Kim I.-M.	2017	Excluded
2218	Selective inhibition of Hdac3 prevents diabetic cardiomyopathy in OVE26 mice via MIR-200A-mediated NRF2 activation	Xu Z., Zheng Y., Zhang Z., Sun J., Cai L.	2017	Excluded
2221	Cytochrome B5 reductase 3 is essential for cardiomyocyte function	Carew N.T., Altmann H.M., Galley J.C., Hahn S., Miller M.P., Shiva S., McNamara D., Straub A.C.	2017	Excluded
2223	Coxsackievirus infection during the first trimester of pregnancy leads to ventricular septal defect	Sharma V., Goessling L., Mullen C., Muller A., Dailey B., Perry D., Miller A., Carvajal H., Brar A., Eghtesady P.	2017	Excluded
2224	SGC signaling and MtFt attenuate doxorubicin-induced cardiomyopathy	Zhao X., Guan L.	2017	Excluded
2229	None of fibrosis-linked microRNA (miR-21, miR-26, miR-29, miR-30 and miR-133a) is associated with cardiovascular events in dilated cardiomyopathy	Rubiś P., Totoń-Zurańska J., Wiśniowska-Śmiałek S., Holcman K., Wołkow P., Kołton-Wróz M., Wypasek E., Kozanecki A., Podolec P.	2017	PASS	No text
2230	21st International Congress of the Polish Cardiac Society		2017	Excluded
2231	Biomarkers, genetics and epigenomics in pediatric VAD Patients	Caselli C., Pitto L., Ragusa R., Di Molfetta A., Prontera C., Rizzo M., D'Aurizio R., Cabiati M., Del Ry S., Clerico A., Amodeo A., Trivella M.G.	2017	Excluded
2234	Plasma microRNAs for identification of patients with Lamin A/C gene mutation causing familial dilated cardiomyopathy	Toro Cebada R., Blasco-Turrion S., Gonzalez P., Morales F., Lopez-Granados A., Segura J., Mesa-Rubio D., Cano-Calabria L., Fernandez-Armenta J., Rosa-Longobardo F., Izquierdo I., Garcia A., Mangas A., Llorente-Cortes V., De Gonzalo-Calvo D.	2017	Excluded
2239	The role of miR-21 in mediating diabetes associated cardiac fibrosis by regulating Akt/PKB signaling	Kumar A., Kumar A., Khullar M.	2017	Excluded
2241	Circulating miRNAs and BAG3-related dilated cardiomyopathy	Toro R., Saura M., De Gonzalo-Calvo D., Llorente-Cortes V., Rosa-Longobardo F., Rodriguez-Leal C., Mesa-Rubio M.D., Mangas A., Zamorano J.L., Zaragoza C.	2017	Excluded
2242	Circulating miRNAs as biomarkers for familial dilated cardiomyopathy	De Gonzalo Calvo D., Blasco-Turrion S., Morales F.J., Gonzalez P., Lopez Granados A., Segura J., Mesa-Rubio D., Fernandez-Armenta J., Cano Calabria L., Rosa Longobardo F., Izquierdo I., Garcia A., Mangas A., Llorente-Cortes V., Toro R.	2017	Excluded
2243	Development of the novel miRNA engineered oncolytic virotherapy for clinical trial	Jia Y., Miyamoto S., Kohara H., Yotsuya L., Sagara M., Takishima Y., Matsuura K., Shimizu H., Tani K.	2017	Excluded
2251	miR140 and miR6321/ miR6321 contribute the pathogenesis in acute myocardial infarction revealed by integrative study of mRNA and microRNA transcriptomes	Wang Y., Lin W., Nugent C.A., Zhu R., Li C., Zhu L., Wang W.	2017	Excluded
2252	Associations between serum markers of extracellular matrix metabolism, fibrosis-linked micrornas (MIR-21, MIR-26, MIR-29, MIR-30 and MIR-133A) and right ventricular parameters in dilated cardiomyopathy	Rubis P., Toton-Zuranska J., Wisniowska-Smialek S., Holcman K., Wypasek E., Rudnicka-Sosin L., Kołton-Wróz M., Wołkow P., Kozanecki A., Podolec P.	2017	PASS	No control group
2253	Relations between fibrosis-linked micrornas (MIR-21, MIR-26, MIR-29, MIR-30 and MIR-133A) and right ventricular morphology and function in dilated cardiomyopathy	Rubis P., Toton-Zuranska J., Wisniowska-Smialek S., Holcman K., Wołkow P., Wypasek E., Natorska J., Rudnicka-Sosin L., Pawlak A., Kozanecki A., Podolec P.	2017	PASS	No control group
2260	Matrix-forming phenotype of synovial fluid-derived stem cells induced by transforming growth factor β 3 and insulin-like growth factor 1 in a meniscus-derived decellularized matrix	Liang Y., Andrews S., Szojka A., Idrees E., Kunze M., Mullet-Sierra A., Jomha N., Adesida A.	2017	Excluded
2275	Improvement of coxsackievirus B3 (CVB3) myocarditis model by use of miR-375-regulated CVB3	Pryshliak M., Knoch K.P., Klingel K., Hazini A., Pinkert S., Fechner H.	2017	Excluded
2278	Therapeutic efficacy of bone marrow derived mesenchymal stem cells on acute anthracyclines cardiotoxicity enhanced by microRNA-21 mediated regulation of apoptosis and angiogenesis	Hu J., Yang T., Chen Q., Zeng Y., Chen S., Wu X.	2017	Excluded
2279	Potential role of mirnas in the development of cardiomyopathies in propionic acidemia	Fulgencio-Covián A., Rivera-Barahona A., Alonso-Barroso E., Pérez B., Barry M.A., Ugarte M., Pérez-Cerdá C., Richard E., Desviat L.R.	2017	Excluded
2287	Exploring miRNA-mRNA regulatory network in cardiac pathology of NA/h exchanger isoform 1 transgenic mouse hearts	Xue J., Zhou D., Hartley I., Poulsen O., Haddad G.G.	2016	Excluded
2288	MicroRNA-33 maintains cellular cholesterol content in fibroblasts and fibrotic response in heart	Nishiga M., Horie T., Kuwabara Y., Baba O., Nakao T., Nishino T., Hakuno D., Nakashima Y., Nagao K., Hasegawa K., Kita T., Kimura T., Ono K.	2016	Excluded
2292	Xylosyltransferasen als Marker fibrotischer Erkrankungen	Faust I., Fischer B., Kuhn J., Knabbe C., Hendig D.	2016	Excluded
2293	The serum level of miR-362-5p and miR-10b-5p discriminate patients with dilated cardiomyopathy from healthy individuals	Pajič T., Klinec N., Sever M., Černelč P., Vrtovec B.	2016	PASS	PASS
2298	Circulating miR-489 could be a new generation biomarker for dilated cardiomyopathy	Ishiguro T., Hayashi M., Sugishita Y., Fujiwara W., Kamada T., Naruse H., Ishii J., Kato Y., Ozaki Y., Izawa H.	2016	PASS	Duplicate
2300	System biology approaches to identify Gene-microRNA pathophysiology related networks in Chagas disease	Ferreira L.R.P., Laugier L., Ferreira F.M., Cabantous S., Cândido D.D.S., Rozanski A., Lannes-Vieira J., Chevillard C., Kalil J., Cunha-Neto E.	2016	Excluded
2301	Autophagy and inflammation in idiopathic dilated cardiomyopathy	Caragnano A., Aleksova A., Finato N., Sinagra G., Livi U., Sponga S., Cesselli D., Beltrami A.P.	2016	PASS	Improper diagnosis
2303	MicroRNAs differential gene expression in peripheral blood mononuclear cells from patients with acute myocarditis	Marketou M., Kontaraki J., Konstantinou J., Parthenakis F., Nakou H., Touloupaki M., Kochiadakis G., Logakis J., Vougia D., Vardas P.	2016	PASS	Duplicate
2308	Differential response of males and females to a miRNA-34a based treatment in a mouse model of dilated cardiomyopathy	Bernardo B., Ooi J., Tham Y., Kiriazis H., Patterson N., Lin R., McMullen J.	2016	Excluded
2311	MicroRNA-125b-5p protect the mouse heart from ischemic injury by repressing pro-apoptotic Bak1 and Klf13 in cardiomyocytes	Broskova Z., Park K.-M., Wang Y., Kim I.-M.	2016	Excluded
2312	Role of the 17beta-Estradiol/beta-catenin axis in heart failure	Kararigas G., Zelarayan L.C., Toischer K., Hasenfuss G., Jarry H., Regitz-Zagrosek V.	2016	Excluded
2316	MicroRNAs as potential regulators of monocyte differentiation and function in heart fibrosis in systemic sclerosis	Rudnik M., Stellato M., Blyszczuk P., Pachera E., Dobrota R., Maurer B., Klingel K., Henes J., Sotlar K., Distler O., Kania G.	2016	PASS	No data
2319	Assessing the miRNA values of the children with rheumatic carditis: A possible biomarker for future?	Hallioglu O., Gumus G., Karpuz D., Bobusoglu O., Tamer L.	2016	PASS	Multiple Publication
2320	Correlation between circulating microRNA 29 and diffuse myocardial fibrosis, assessed by T1 mapping, in patients affected by non ischemic dilative cardiomyopathy	Calvieri C., Preda M.B., Perfetti A., Valaperta R., Secchi F., Fedele F., Martelli F., Lombardi M.	2016	PASS	No control group
2321	Contraceptive hormone therapy induced spontaneous coronary artery dissection	Shekar C., Perucki W., Wankhade C., Krishna N.	2016	Excluded
2323	The role of circulating miR-21, miR-34a, miR-423, miR-208a and miR-499a in ischemic and dilated cardiomyopathy	Zaseeva A.V., Zhirov I.V., Tereschenko S.N., Scvortcov A.A., Masenko V.P., Kochetov A.G., Gimadiev R.R., Abramov A.A., Lyang O.V.	2016	PASS	PASS
2324	MiR-17-3p contributes to exercise-induced cardiac growth and protects against myocardial ischemia-reperfusion injury	Xiao J., Shi J., Bei Y., Xu T., Wang H., Chen P., Li X., Kong X.	2016	Excluded
2327	Novel recombinant coxsackievirus B3 infection elicits robust oncolytic activity against human non-small lung cancer and triple-negative breast cancer	Sagara M., Takishima Y., Miyamoto S., Shimizu H., Nakanishi Y., Tani K.	2016	Excluded
2328	The micro-RNA let-7f regulates expression of the voltage-gated mechanosensitive ion channel Na(V)1.5 in human gastrointestinal smooth muscle	Mazzone A., Strege P.R., Bernard C.E., Cima R.R., Larson D.W., Dozois E.J., Hayashi Y., Ordog T., Gibbons S.J., Beyder A., Farrugia G.	2016	Excluded
2340	Role of miRNA-33a in Dilated Cardiomyopathy	Mittal A., Rana S., Sharma R., Arige V., Khanna S., Mahapatra N., Sarkar S., Nahar U., Bahl A., Goswami S., Khullar M.	2016	PASS	No data
2343	Orchestrated role of cardiovascular microRNAs in diabetic cardiomyopathy	Rawal S., Munasinghe E., Shindikar A., Manning P., Katare R.	2015	Excluded
2344	Endogenous cardiac stem cells' activation in response to injury potentiates their regenerative ability	Smith A.J., Aquila I., Henning B.J., Scalise M., Nadal-Ginard B., Ellison G.M., Torella D.	2015	Excluded
2345	Microrna expression profiles in endomyocardial biopsies from patients with myocarditis-association with left ventricular function and clinical events	Besler C., Urban D., Watzka S., Klingel K., Kandolf R., Schuler G., Adams V., Lurz P.	2015	PASS	Duplicate
2355	Importance of the C-terminal transactivation domain of STAT3 in hypertension-induced cardiac hypertrophy	Zouein F.A., Zgheib C., Do Carmo J.M., Vaka R., Altara R., Kurdi M., Booz G.	2015	Excluded
2356	Identification of pathologic circulating factors in children with dilated cardiomyopathy	Jiang X., Reid B., Stauffer B., Miyamoto S., Sucharov C.	2015	Excluded
2359	FOXO3a deficiency protects from pathogen-induced myocarditis in mice and men	Skurk C., Loebel M., Jenke A., Pinkert S., Fechner H., Schultheiss H.P., Poller W., Scheibenbogen C., Landmesser U.	2015	Excluded
2360	Genomewide expression profiling of micro-RNA in atrial fibrillation	Cortez-Dias N., Costa M., Carvalho R., Magalhaes A., Calisto C., Galego X., Sousa J., Nobre A., Pinto F.J., Enguita F.	2015	Excluded
2361	Microrna-21∗ controls sepsis-induced cardiac dysfunction	Wang H., Bei Y., Shi J., Sun W., Liu H., Li X., Xiao J., Kong X.	2015	Excluded
2362	Mir-433 controls cardiac fibrosis	Tao L., Wu X., Chen P., Li S., Zhang X., Bei Y., Xu T., Xiao J., Li X.	2015	PASS	Improper diagnosis
2363	Identification and characterization of a miRNA cohort initiated transitional program that controls cell cycle arrest of the perinatal heart	Burgon P.G., Weldrick J.J.	2015	Excluded
2368	Extracellular RNA induces inflammatory response via TLR7 and contributes to myocardial ischemia-reperfusion injury	Feng Y., Chen H., Zou L., Xu G., Chao W.	2015	Excluded
2369	MicroRNA-based multi-tissue detargeted mengovirus therapy for multiple myeloma	Ruiz A.J., Hadac E.M., Nace R.A., Russell S.J.	2015	Excluded
2370	Impact of single nucleotide polymorphisms upon treatment outcome in idiopathic dilated cardiomyopathy: A pilot study	Lopez-Vilella R., Sanchez Lazaro I.J., Herrero M.J., Boso V., Martinez-Dolz L., Rojas L., Megias-Vericat J.E., Alino S., Almenar-Bonet L.	2015	Excluded
2373	MicroRNA expression pattern in patients with ventricular arrhythmias and end stage heart failure	Calway T., Bak T., Furlough K., Kim G.	2015	Excluded
2377	FOXO3a deficiency protects from coxsackievirus B3 myocarditis: Role of NK cell function	Holzhauser L., Löbel M., Jenke A., Becher M., Bauer S., Pinkert S., Fechner H., Poller W., Schultheiss H.-P., Scheibenbogen C., Skurk C.	2015	Excluded
2397	Increased microRNA-130a in patients with ventricular tachycardia and end-stage heart failure	Calway T., Bak T., Kim G.	2014	Excluded
2398	Deep sequencing reveals distinct right ventricular miRNA signature in failing human heart	Yang K.-C., Di Salvo T.G.	2014	Excluded
2399	Autophagy is regulated by miR-106b in the heart	Kuhn C., Boeck L., Hille S., Dierck F., Eschenhagen T., Frey N.	2014	Excluded
2401	miRNA-17-3p controls exercise-induced cardiac growth	Shi J., Xuan Q., Sun W., Ji Y., Wang H., Fu S., Xiao J., Kong X.	2014	Excluded
2402	miR21∗ contributes to sepsis-induced cardiac dysfunction	Hui W., Kong X.	2014	Excluded
2403	A case of post-transplantation lymphoproliferative disorder (PTLD) six months after heart transplantation complicated with small intestine perforation after chemotherapy	Nitta D., Imamura T., Kinugawa K., Amiya E., Fujino T., Hatano M., Nawata K., Ono M., Komuro I., Kurokawa M.	2014	Excluded
2404	Immune and gene therapy as an emerging cancer treatment	Tani K., Hijikata Y., Murahashi M., Miyamoto S., Inoue H., Tanaka Y., Kobayashi S., Tsuruta T., Yamada K., Okazaki T.	2014	Excluded
2405	Type 2 diabetes mellitus in patients with terminal stage heart failure	Dóka G., Mlynárová J., Křenek P., Musil P., Klimas J., Goncalvesová E., Kyselovič J.	2014	Excluded
2406	Cardiac-specific microRNAs as early modulators in diabetic cardiomyopathy	Rawal S., Munasinghe E., Shindikar A., Katare R.	2014	Excluded
2407	SIRT1 drives persistent myocardial dysfunction via epigenetic regulation of mitochondrial adaptor p66Shc in the diabetic heart	Costantino S., Paneni F., Mitchell K., Berrino L., Volpe M., Schwarzwald C., Luscher T.F., Cosentino F.	2014	Excluded
2409	miRNA expression in hypoplastic left heart syndrome	Sucharov J., Karimpour-Fard A., Nunley K., Stauffer B., Miyamoto S.	2014	Excluded
2410	Gene expression profiling in pediatric and adult heart failure	Miyamoto S., Taylor M., Karimpour-Fard A., Jones K., Stauffer B., Sucharov C.	2014	Excluded
2413	A β1-Adrenergic Receptor/β-Arrestin1-Regulatable MicroRNA, MiR-150 Protects the Mouse Heart from Ischemic Injury by Repressing Pro-apoptotic Egr2 and P2x7r	Kim I.-M., Tang Y., Wang Y., Park K.-M., Hu Q.	2014	Excluded
2414	MicroRNA-150 activates expression of MAP2K4 during hypoxia/reoxygenation in cardiomyocytes	Yeh C.H., Chen T.P., Wang Y.C., Chien H.J., Liang H.Y., Fang S.W., Fang Y.C.	2014	Excluded
2415	The microRNA-221/222 family is differentially regulated in cardiac disease and counteracts pressure overload-induced cardiac remodeling in mice	Peters T., Bijnen M., Rech M., Van Leeuwen R., Derks W., De Windt L.J., Heymans S., Schroen B.	2014	Excluded
2419	Role of microRNAs in malignant heart diseases	Yang B., Shan H., Chu W., Pan Z., Zhang Y., Lu Y.	2014	Excluded
2431	Molecular basis of 5-fluorouracil-related toxicity: Lessons from clinical practice	Papanastasopoulos P., Stebbing J.	2014	Excluded
2435	Ribonucleic Acid Biomarkers for Heart Failure. Is There a Correlation Between Heart and Blood Transcriptomics?(*).	Shehadeh L.A., Hare J.M.	2013	Excluded
2438	MiRNA-146a is a therapeutic target and biomarker for peripartum cardiomyopathy	Ricke-Hoch M., Julie H., Tabruyn S., Haghikia A., Scherr M., Struman I., Hilfiker-Kleiner D.	2013	Excluded
2439	MicroRNA-200c regulatesMAPKs by modulatingMAPK Phosphatases- 1 expression in diabetes induced cardiac hypertrophy	Singh G.B., Raut S.K., Kumar A., Sharma R., Sharma V., Khanna S., Saikia U., Khullar M.	2013	Excluded
2440	Circulating microRNA: Prognostic biomarker for pediatric heart failure	Miyamoto S.D., Peterson V., Cagle L., Freed B., Stauffer B., Sucharov C.C.	2013	PASS	No data
2442	ERBB2: A target of microrna-7 regulates cardiac remodeling	Gupta M., Prasad S.V.N.	2013	Excluded
2443	mir-208a-3p is downregulated in cardiac remodeling and possibly controls GATA4 expression	Farjun B., Barbosa R.A., Alves L.M., Suhett G.D., Pinto L.M., Paula L.F.S., Brasil G.V., Carvalho A.R., Nascimento J.H., Carvalho A.B.	2013	Excluded
2447	Role of microRNAs in heart diseases and translational research	Yang B.-F., Zhang Y., Shan H.-L., Chu W.-F., Lu Y.-J.	2013	Excluded
2461	Transcriptional mechanisms leading to dilated cardiomyopathy in the absence of hypertrophy	Tuana B.S.	2013	Excluded
2462	Dual microRNA-regulated oncolytic coxsackievirus B3 infection displays antitumor activity with attenuated pathogenicity in mice	Miyamoto S., Inoue H., Sagara M., Wang B., Takayama K., Shimizu H., Nakanishi Y., Tani K.	2013	Excluded
2463	AAV9-mediated MIR-499 expression is sufficient to induce progressive heart failure in mice	Tang R.-H., Xiao B., Yuan Z., Qiao C., Li J., He B., Li J., Xiao X.	2013	Excluded
2464	Mengovirus therapy for multiple myeloma	Ruiz A., Hadac E.M., Russell S.J.	2013	Excluded
2467	Expression of PITX2 transcription factor is re-activated in heart failure: Evidence from the pig model and patient samples	Torrado M., Franco D., Hernandez-Torres F., Domenech N., Crespo-Leiro M.G., Castro-Beiras A., Mikhailov A.	2013	Excluded
2468	Inhibition of miR-148a results in accelerated dilated cardiomyopathy	Philippen L.E., Dirkx E., Lopez-Andres N., Bitsch N., Da Costa Martins P.A., De Windt L.J.	2013	Excluded
2469	Does electrical stimulation in heart failure patients promote structural cardiac regeneration through alterations of signalling pathways?	Wadowski P.P., Mader R.M., Andreas M., Khatami N., Jusic A., Khazen C., Mohl W.	2013	Excluded
2476	Mir-21 regulates cardiac fibrosis via AKT/PKB pathway in diabetic cardiomyopathy	Khullar M., Kumar A., Raut S.K., Singh G., Sharma V., Saikia U.	2013	Excluded
2480	Foxo3a deficiency and viral load in acute coxsackievirus b3 myocarditis: Role of NK cell function	Skurk C., Loebel M., Holzhauser L., Becher M., Pinkert S., Schultheiss H.-P., Scheibenbogen C.	2013	Excluded
2481	The protective effects of guaraná extract (Paullinia cupana) on fibroblast NIH-3T3 cells exposed to sodium nitroprusside	Bittencourt L.S., Machado D.C., Machado M.M., Dos Santos G.F.F., Algarve T.D., Marinowic D.R., Ribeiro E.E., Soares F.A.A., Barbisan F., Athayde M.L., Cruz I.B.M.	2013	Excluded
2494	Alterations in the cardiac mitochondrial and myofilament subproteome upon targeted dicer deletion	Yin X., Abbonenc M., Da Costa Martins P., Srivastava S., Gautel M., De Windt L., Mayr M.	2012	Excluded
2495	Deep-sequencing of circulating micrornas reveals distinct profiles in patients with advanced heart failure and specific dynamics following mechanical unloading	Akat K.M., Ramarathnam A., Moore D., Brown M., Morozov P., Wu C., Akashi H., Tuschl T., Schulze P.C.	2012	Excluded
2496	Microrna-7- ERBB2 axis: A critical regulator of cardiac remodeling	Gupta M., Prasad S.V.N.	2012	Excluded
2498	Adaptive upregulation of microrna-146B following surgical ischemia-reperfusion attenuates myocardial inflammation	Friede K.A., Ma Q., Phua K.K., Zhang Z., Smith M.P., Leong K.W., Ivan M., Podgoreanu M.V.	2012	Excluded
2500	Deep RNA sequencing reveals dynamic regulation of myocardial noncoding RNA in failing human heart and remodeling with mechanical circulatory support	Yang K.-C., Yamada K.A., Patel A.Y., Topkara V.K., Ewald G.A., Mann D.L., Nerbonne J.M.	2012	Excluded
2505	The roles of presenilin-2 gene in the apoptosis of myocardial cell	Li H., Chen Y., Rao L.	2012	Excluded
2512	Microrna-30C modulates diabetes-induced cardiac hypertrophy via PI3K/AKT signaling pathway	Raut S.K., Kumar A., Singh G.B., Sharma R., Saikia U., Khullar M.	2012	Excluded
2513	Haploinsufficiency of muscle-enriched a-type lamin interacting protein (MLIP) manifests as enlarged dilated hearts	Burgon P., Lockwood J., Wells G., Blais A.	2012	Excluded
2514	Losartan improves disease outcome in a double-mutant model of severe hypertrophic cardiomyopathy	Shephard R.E., Tsoutsman T., Bagnall R.D., Ritchie W., Semsarian C.	2012	Excluded
2520	In utero caffeine exposure alters dna methylation patterns in adult hearts	Xiefan F., Christopher W., Scott R.	2012	Excluded
2521	TWIST-1 and its target, the miR 199/214 cluster, are down-regulated in dilated cardiomyopathy resulting in increased proteasome activity in human myocardium	Springer J., Baumgarten A., Bang C., Pregla R., Tschirner A., Adams V., Meyer R., Thum T., Hetzer R., Anker S.D.	2012	PASS	Improper diagnosis
2524	Drug-induced cardiomyopathies of mitochondrial origin	Wallace K.B.	2012	Excluded
2525	MiR-133 as an epigenetic regulator of diabetic heart failure	Chavali V., Tyagi N., Tyagi S.C., Mishra P.K.	2012	Excluded
2527	Does cardiomyocyte specific deletion of plasma membrane calcium ATPase 1 lead to altered microRNA expression in heart failure?	Addlestone J.M.A., Cartwright E.J.	2012	Excluded
2528	Targeted deletion of Dicer alters the cardiac mitochondrial and myofilament subproteome	Abonnenc M., Da Costa Martins P., Srivastava S., Didangelos A., Yin X., Gautel M., De Windt L., Mayr M.	2012	Excluded
2530	Down regulation of TWIST-1 and its target, the miR 199/214 cluster, in human myocardium of patients with dilated cardiomyopathy results in increased proteasome activity	Baumgarten A., Bang C., Pregla R., Tschirner A., Adams V., Meyer R., Thum T., Hetzer R., Anker S.D., Springer J.	2012	PASS	Improper diagnosis
2537	Perinatal heart development: Identification and characterization of a transitional program that controls cell cycle arrest and terminal differentiation of the heart	Kouri L., Burgon P.G.	2012	Excluded
2538	MicroRNA-199b targets the nuclear kinase Dyrk1a in an auto-amplification loop promoting calcineurin/NFAT signaling	Salic K., Da Costa Martins P.A., Gladka M.M., Leptidis S., El Azzouzi H., Hansen A., Condorelli G., Arbones M.L., Eschenhagen T., De Windt L.J.	2011	Excluded
2540	High-throughput sequencing analysis of microrna profile dynamics in patients with advanced heart failure undergoing ventricular assist device placement in comparison to normal adult and fetal cardiac expression	Akat K.M., Mihailovic A., Williams Z., Brown M., Morozov P., Takayama H., Drosatos K., Tuschl T., Schulze P.C.	2011	PASS	PASS
2541	Microrna-21 contributes to diabetic cardiomyopathy associated cardiac fibrosis	Kumar A., Raut S.K., Saikia U.N., Sharma R., Khullar M.	2011	Excluded
2542	Differential expression of serum MicroRNAs is associated with recovery from heart failure	Ramani R., Lemster B., Gorcsan J., Alexis J., Torre-Amione G., Dec G.W., Liu P., McTiernan C., McNamara D.M.	2011	Excluded
2543	Micro RNA could play key roles in progression of myocardial fibrosis in patients with heart failure	Kinoshita K., Izawa H., Kato Y., Yokoi H., Fujiwara W., Cheng X.W., Hirashiki A., Mizoguchi Y., Ohtsuki M., Ishii J.-I., Morimoto S.-I., Murohara T., Ozaki Y., Nomura M.	2011	Excluded
2546	MicoRNA-208a is involved in post-natal cardiac remodeling by targeting slow skeletal troponin I isoform in mouse heart	Knezevic I., Solaro R.J., Gupta M.	2011	Excluded
2547	Dysregulation of microRNAs in diabetic post-ischemic heart failure patients	Greco S., Fasanaro P., Castelvecchio S., D'alessandra Y., Menicanti L., Arcelli D., Di Donato M., Malavazos A., Capogrossi C.M., Martelli F.	2011	Excluded
2549	Heart failure - MicroRNA expression	Doka G., Mlynarova J., Krenek P., Gonc¸alvesova E., Hulman M., Hudec V., Musil P., Kyselovic J.	2011	Excluded
2554	Customized antibiotic free non-viral plasmid vectors for therapy and vaccination	Luke J.M., Vincent J.M., Hodgson C.P., Williams. J.A.	2011	Excluded
2555	MicroRNA and protein regulation by the SRF transcription factor in a mouse model of dilated cardiomyopathy	Tritsch E., Tritsch E., Li Z., Mericskay M.	2011	Excluded
2556	MicroRNA profiling in diastolic dysfunction	Nair N., Kumar S., Gupta S., Dehmer G.	2011	Excluded
2558	Microrna-21 plays a role in diabetes induced myocardial disease	Khullar M., Kumar A.K., Mittal A., Sharma R., Raut S., Singh G.B., Nahar U.	2011	Excluded
2559	Cardiac microRNAs alterations in pacing-induced heart failure	Ojaimi C., Ford C., Sarnari R., Vimercati C., Qanud K., Hintze T.H., Recchia F.A.	2011	Excluded
2562	Disrupted myogenic signaling in emerin-null murine myoblasts	Koch A.J., Holaska J.	2010	Excluded
2563	Molecular biology: Genetic idiopathic dilated cardiomyopathy	Kyriakou P., Kyriakou Ch.	2010	Excluded
2566	Shifting heart to skeletal muscle: MiR669 functions as a cell fate switch between cardiac and skeletal muscle lineages	Crippa S., Galli D., Cassano M., Janssens S., Gijsbers R., Debyser Z., Cossu G., Sampaolesi M.	2010	Excluded
2568	Changes in regulatory miRNA's during continuous flow LVAD-support in the failing human heart	Lok S., Schipper M.E.I., Van Kuik J., Lahpor J., Doevendans P.A.F., De Weger R.A., De Jonge N.	2010	Excluded
2570	Micro RNAs could play key roles in progression of left ventricular diastolic dysfunction involved in myocardial fibrosis in patients with heart failure	Izawa H., Kato Y., Yokoi H., Fujiwara W., Xian Wu C., Mizoguchi Y., Morimoto S., Murohara T., Ozaki Y., Nomura M.	2010	Excluded
2575	Circulating miRNAs as potential biomarkers in cardiovascular disease	Corsten M.F., Dennert R., Kouznetsova T., Devaux Y., Staessen J.A., Hofstra L., Heymans S., Schroen B.	2010	PASS	Duplicate
2576	Role of dicer in diabetic cardiomyopathy through dysregulation of MMP-9 and TIMP-4	Mishra P.K., Givvimani S., Sen U., Abe O.A., Tyagi N., Basu P., Munjal C., Tyagi S.C.	2010	Excluded
2579	44th Annual Scientific Meeting of the European Society for Clinical Investigation		2010	Excluded
2580	Localization and distribution of Micro-RNAs in the myocardium of heart failure patients before and after LVAD support	Van Kuik J., Lok S., Schipper M.E.I., Dullens H., De Windt L., Da Costa Martins P.A., De Jonge N., De Weger R.A.	2010	PASS	Improper diagnosis
2584	Epigenetic profiling identifies DNA methylation regulates differential expression of angiogenic factors in human heart failure	Movassagh M., Down T.A., Choy M.-K., Goddard M.J., Bennett M.R., Foo R.S.	2009	Excluded
2585	Impaired in vivo repair capacity of endothelial progenitor cells in patients with chronic heart failure: Role of differential microRNA regulation and paracrine factors	Doerries C., Briand S., Besler C., Mocharla P., Mueller M., Manes C., Ruschitzka F.T., Noll G., Luescher T.F., Landmesser U.	2009	Excluded
2587	Myocardial expression of microRNA-208 in human dilated cardiomyopathy	Satoh M., Minami Y., Takahashi Y., Tabuchi T., Nakamura M.	2009	PASS	Improper diagnosis
2591	Expression of MicroRNA-212 is increased in left ventricular myocardium of explanted failed human hearts and in dogs with experimentally-induced heart failure	Gupta R.C., Sabbah H.N.	2009	Excluded
2592	Altered Micro-RNA expression in the heart after LVAD support	Dullens H.F.J., Van Kuik J., Schipper M.E.I., De Jonge N., De Weger R.A.	2009	PASS	Duplicate
2612	Isradipine prevents the development of spontaneously occurring cardiac necrosis in cardiomyopathic hamster	Jacques D., Bkaily G., Jasmin G., D'Orléans-Juste P., Chahine M.	2003	Excluded
2623	Genetic polymorphisms of the angiotensin II type 1 (AT(1)) receptor gene	Rolfs A., Weber-Rolfs I., Regitz-Zagrosek V., Kallisch H., Riedel K., Fleck E.	1994	Excluded
