# Supplementary material for: A Systematic Review of miRNA and cfDNA as Potential Biomarkers for Liquid Biopsy in Myocarditis and Inflammatory Dilated Cardiomyopathy
Source: MDPI journal article supplement (doi:10.3390/biom12101476), 2022-10-13
Supplement: s1 [file Table S2.xlsx]

## Sheet: Arkusz1
Animal study	Study involved animals but not human subjects.
Duplicate	This study record is a duplicate.
Improper diagnosis	Patients were not diagnosed with myocarditis, inflammatory dilated cardiomyopathy or idiopathic dilated cardiomyopathy consistent with the review criteria.
Multiple Publication	This article contains only data presented in another article.
No control group	This study lacks control or comparator group.
No text	Neither text nor abstract of this study is available.
No patient characteristics	Patient characteristics are not sufficiently described in this article.
Not miRNA	This study did not measure miRNA or cfDNA levels.
Public dataset analysis	This study involved an analysis of a publicly available dataset.
