# Supplementary material for: A Systematic Review of miRNA and cfDNA as Potential Biomarkers for Liquid Biopsy in Myocarditis and Inflammatory Dilated Cardiomyopathy
Source: MDPI journal article supplement (doi:10.3390/biom12101476), 2022-10-13
Supplement: s1 [file Table S3.pdf › biomolecules-1931636-supplementary/Supplementary materials/Table S3.pdf]

| Study | ID | Assessed microRNA (in validation study if applicable)                                                                                                                                                                                                                                                                                                                   | Number of patients (study group / control)                                                                                                      | Patient age                                                                                                                                                            | % of female patients                                                                                                               | Type of sample | Method of miRNA screening                                                                                                     | Method of miRNA isolation                                              | Method of measurement                                                                                                                                             | Reference gene                                                          | Clinical diagnosis of study group | Clinical diagnosis of control group / groups                                           |
|-------|----|-------------------------------------------------------------------------------------------------------------------------------------------------------------------------------------------------------------------------------------------------------------------------------------------------------------------------------------------------------------------------|-------------------------------------------------------------------------------------------------------------------------------------------------|------------------------------------------------------------------------------------------------------------------------------------------------------------------------|------------------------------------------------------------------------------------------------------------------------------------|----------------|-------------------------------------------------------------------------------------------------------------------------------|------------------------------------------------------------------------|-------------------------------------------------------------------------------------------------------------------------------------------------------------------|-------------------------------------------------------------------------|-----------------------------------|----------------------------------------------------------------------------------------|
| [1]   | 1  | miR-Chr8:96,<br>miR-483-5p,<br>miR-21-5p,<br>miR-212-3p,<br>miR-132-3p                                                                                                                                                                                                                                                                                                  | Main cohort: 42/170<br>Validation cohort I: 34/11<br>Validation cohort II: 35/20<br>Validation cohort III: 40/49<br>Validation cohort IV: 0/152 | <b>In main cohort:</b><br>Healthy control: 42,31±1,21<br>Acute myocarditis: 40,36±19,40<br>STEMI: 60,31±12,61<br>NSTEMI: 65,69±14,14                                   | <b>In main cohort:</b><br>Healthy control: 48,75<br>Acute myocarditis: 40,36<br>STEMI: 60,31<br>NSTEMI: 65,69                      | Serum          | Murine experiment and microRNA analysis (microarrays and qPCR)                                                                | Invitrogen miRVana miRNA Isolation kit                                 | qRT-PCR, Exiqon miRCURY LNA Universal RT microRNA PCR kit, Exiqon microRNA LNA PCR primer sets, Applied Biosystem SYBR green PCR mix, for miR-Chr8:96 own primers | UniSp5 or UniSp2 (Exiqon, RNA Spike-in kit), miR-423-3p and miR-103a-3p | MCI                               | Healthy subjects, STEMI, NSTEMI, acute coronary syndrome MINOCA, myocardial infraction |
| [2]   | 22 | miR-16-5p<br>miR-21-5p<br>miR-29a-5p<br>miR-133a-3p<br>miR-191-5p<br>miR-320a<br>miR-423-5p                                                                                                                                                                                                                                                                             | DCM:53<br>IHD:34<br>Control:48                                                                                                                  | DCM: 59±12<br>IHD: 66±9<br>Control 64±5                                                                                                                                | DCM:32<br>IHD:12<br>Control: 62                                                                                                    | Plasma         | NA                                                                                                                            | Qiagen miRNEasy kit                                                    | qRT-PCR, Exiqon miRCURY LNA™ Universal RT microRNA PCR, Polyadenylation, and cDNA synthesis kit                                                                   | UniSp6 spike-in                                                         | Ni-IDCM                           | Healthy Controls, Ischemic Heart Disease                                               |
| [3]   | 26 | let-7a-5p<br>let-7g-5p<br>miR-1-3p<br>miR-16-5p<br>miR-16-2-3p<br>miR-19b-3p<br>miR-25-3p<br>miR-29a-3p<br>miR-30b-5p<br>miR-30c-3p<br>MIR-130b-3p<br>miR-133a-3p<br>miR-133b-3p<br>miR-142-3p<br>miR-145-5p<br>miR-150-5p<br>miR-192-5p<br>miR-199a-3p<br>miR-210-3p<br>miR-215-3p<br>miR-324-3p<br>miR-363-3p<br>miR-454-3p<br>miR-532-5p<br>miR-629-5p<br>miR-660-5p | MODERATE<br>Idiopathic DCM: 40<br>Ischemic DCM: 46<br><br>SEVERE<br>Idiopathic DCM: 15<br>Ischemic DCM: 14<br><br>Control: 44                   | MODERATE<br>Idiopathic DCM: 67.6 ± 9.4<br>Ischemic DCM: 68.0 ± 8.3<br><br>SEVERE<br>Idiopathic DCM: 66.5 ± 8.4<br>Ischemic DCM: 68.7 ± 8.4<br><br>Control: 39.1 ± 12.8 | MODERATE<br>Idiopathic DCM: 30<br>Ischemic DCM: 23,9<br><br>SEVERE<br>Idiopathic DCM: 40<br>Ischemic DCM: 7.1<br><br>Control: 47.7 | Plasma         | qRT-PCR Panel                                                                                                                 | Qiagen miRNeasy Serum/Plasma Kit                                       | qRT-PCR, Qiagen miRCURY LNA RT Kit, miRCURY LNA SYBR Green PCR Kit, Qiagen 96-wells Pick-&-Mix microRNA PCR plates                                                | cel-miR-39-3p, UniSp6                                                   | Ni-IDCM                           | Healthy Controls, Ischemic DCM                                                         |
| [4]   | 32 | miR-1<br>miR-134<br>miR-423-5p<br>miR-489<br>miR-496<br>miR-5010<br>miR-5088                                                                                                                                                                                                                                                                                            | 20/5                                                                                                                                            | DCM: 57.4±15.3<br>Control: 53±6                                                                                                                                        | DCM: 35<br>Control:40                                                                                                              | Serum          | miRNA analysis-microarray miRNA analysis previously hybridized 3D-genes human miR chips (Toray Industries, Inc., Tokyo Japan) | NA                                                                     | qRT-PCR                                                                                                                                                           | miR-16 / miR-423-3p                                                     | Ni-IDCM                           | Healthy Controls                                                                       |
| [5]   | 33 | Let-7f-5p<br>Let-7g-5p<br>Let-7i-5p<br>miR-142-5p<br>miR-126-3p<br>miR-143-3p<br>miR-24-3p<br>miR-26a-5p<br>miR-27a-3p<br>miR-27b-3p<br>miR-98-5p                                                                                                                                                                                                                       | 30/16                                                                                                                                           | DCM: 4,15 ± 3.85<br>Control: 5,97 ± 4,41                                                                                                                               | DCM: 56,67<br>Control: 43,75                                                                                                       | Serum          | Illumina sequencing                                                                                                           | mirVana miRNA (Ambion, Thermo Fisher Scientific Inc, Waltham, MA USA). | qRT-PCR                                                                                                                                                           | NA                                                                      | Ni-IDCM                           | Healthy Controls                                                                       |
| [6]   | 49 | miR-3135b<br>miR-3908<br>miR-5571-5p                                                                                                                                                                                                                                                                                                                                    | 20/19                                                                                                                                           | Control: 56,7 ± 9,1<br>DCM: 59,2 ± 13,1                                                                                                                                | Control: 20,0<br>DCM: 15,8                                                                                                         | Serum          | Exiqon miRCURYTM LNA Array                                                                                                    | Invitrogen TRIzol, Qiagen Rneasy Mini Kit                              | qRT-PCR                                                                                                                                                           | miR-191-5p                                                              | Ni-IDCM                           | Healthy Controls                                                                       |
| [7]   | 70 | miR-29b<br>miR-125b<br>miR-220c-3p                                                                                                                                                                                                                                                                                                                                      | FM:10<br>MI:10<br>Control: 7                                                                                                                    | FM: 37,8 ± 4,32<br>MI: 36,09 ± 5,08<br>Control: 35,23 ± 5,12                                                                                                           | FM: 30<br>MI:40<br>Control: 42,9                                                                                                   | Plasma         | miRNA Array                                                                                                                   | King Biotech Rnasy Mini Kit                                            | qRT-PCR                                                                                                                                                           | NA                                                                      | MCI                               | Healthy Controls, Myocardial infarction                                                |

|      |     |                                                                                                                                                                                                                                                                                                                                                                                                                                |                                                                                       |                                                                                                                                      |                                                                                              |        |                                                         |                                                                             |                                                                                                                                                                                                                                                                       |                                       |         |                                                                                                       |
|------|-----|--------------------------------------------------------------------------------------------------------------------------------------------------------------------------------------------------------------------------------------------------------------------------------------------------------------------------------------------------------------------------------------------------------------------------------|---------------------------------------------------------------------------------------|--------------------------------------------------------------------------------------------------------------------------------------|----------------------------------------------------------------------------------------------|--------|---------------------------------------------------------|-----------------------------------------------------------------------------|-----------------------------------------------------------------------------------------------------------------------------------------------------------------------------------------------------------------------------------------------------------------------|---------------------------------------|---------|-------------------------------------------------------------------------------------------------------|
|      |     | miR-142<br>miR-200c-3p                                                                                                                                                                                                                                                                                                                                                                                                         |                                                                                       |                                                                                                                                      |                                                                                              |        |                                                         |                                                                             |                                                                                                                                                                                                                                                                       |                                       |         |                                                                                                       |
| [8]  | 76  | let-7f<br>miR-93<br>miR-197<br>miR-21<br>miR-30a-5p<br>miR-223<br>miR-379<br>mmu-miR-379                                                                                                                                                                                                                                                                                                                                       | Control: 85<br>iDCM: 343<br>DCM: 71                                                   | Control: 44.5 ± 16.5iDCM:<br>49 ± 29<br>DCM: 55 ± 11                                                                                 | Control:69<br>iDCM: 22<br>DCM: 47                                                            | Serum  | TaqMan Open Array<br>(Human MicroRNA<br>Panels A and B) | Invitrogen mirVANA™<br>PARIS™ RNA and<br>Native Protein<br>Purification Kit | qRT-PCR, Thermo Fisher<br>Megaplex stem-loop RT<br>primer, TaqMan MicroRNA<br>Reverse Transcription Kit                                                                                                                                                               | miR-30a-3p                            | InfDCM  | Healthy Controls,<br>Non-inflammatory<br>DCM                                                          |
| [9]  | 82  | miR-99b<br>miR-147<br>miR-155<br>miR-194-5p<br>miR-205<br>miR-218<br>miR-302a<br>miR-454<br>miR-518f<br>miR-544<br>miR-618<br>miR-875-3p                                                                                                                                                                                                                                                                                       | 23/26                                                                                 | Control: 52.23 ± 40<br>DCM: 48.78 ± 43<br><u>months old</u>                                                                          | Control 46,2<br>DCM: 43,5                                                                    | Plasma | NA                                                      | Qiagen miRNeasy<br>Mini Kit                                                 | qRT-PCR, Life Technologies<br>TaqMan miRNA Reverse<br>Transcription Kit, MegaPlex<br>Human RT Primer Pool A,<br>TaqMan PreAmp Master<br>Mix, MegaPlex Human<br>Preamplification Primers,<br>TaqMan Universal PCR<br>Master Mix, Fluidigm<br>Dynamic Array 96.96 chips | miR-483-5p                            | Ni-IDCM | Healthy Controls                                                                                      |
| [10] | 86  | miR-21<br>miR-155<br>miR-181b                                                                                                                                                                                                                                                                                                                                                                                                  | Control: 31<br>Ischemic DCM: 31<br>Idiopathic DCM: 41                                 | Control: 50,29 ± 7,62<br>Ischemic DCM: 49,31 ± 8,99<br>Idiopathic DCM: 55,26±7,47                                                    | Control: 56,8<br>Ischemic DCM: 32,3<br>Idiopathic DCM: 34,1                                  | Serum  | NA                                                      | Ambion TRIzol LS                                                            | qRT-PCR, Promega Cat.<br>#A3500, primers sequences<br>provided                                                                                                                                                                                                        | U6                                    | Ni-IDCM | Healthy Controls,<br>Ischemic<br>Cardiomyopathy                                                       |
| [11] | 96  | miR-1<br>miR-122<br>miR-133a<br>miR-208b<br>miR-223<br>miR-449<br>miR-29b<br>miR-146a<br>miR-146b<br>miR-21<br>miR-126<br>miR-155                                                                                                                                                                                                                                                                                              | Control: 20<br>AMI: 36<br>MCI:14 (acute phase) / 20<br>(post VM)<br>DD: 59<br>AHF: 33 | Control: 32,1 ± 7,3<br>AMI: 62 ± 13<br>MCI: 32,7 ± 16,3 (acute<br>phase) / 37,3 ± 19,4 (post<br>VM)<br>DD: 69 ± 8<br>AHF: 76,3 ± 8,4 | Control: 40<br>AMI: 33,3<br>MCI: 14,2 (acute phase) /<br>15 (post VM)<br>DD: 44<br>AHF: 60,1 | Plasma | NA                                                      | Ambion mirVana<br>PARIS kit                                                 | qRT-PCR, Qiagen miScript<br>kit, Quanta Biosciences BR<br>SYBR-green supermix for IQ,<br>Qiagen MiScript primers<br>sets                                                                                                                                              | Mix of 3 spiked-in<br>synthetic miRNA | MCI     | Healthy Controls,<br>Acute Myocardial<br>Infarction, Diastolic<br>Dysfunction, Acute<br>Heart Failure |
| [12] | 111 | let-7b-5p<br>let-7c-5p<br>miR-1-3p<br>miR-15b-5p<br>miR-17-5p<br>miR-19a-3p<br>miR-19b-3p<br>miR-20a-5p<br>miR-20b-5p<br>miR-23a-3p<br>miR-24-3p<br>miR-27a-3p<br>miR-28-5p<br>miR-30e-5p<br>miR-99b-5p<br>miR-100-5p<br>miR-101-3p<br>miR-103a-3p<br>miR-106a-5p<br>miR-125b-5p<br>miR-126-3p<br>miR-126-5p<br>miR-140-5p<br>miR-191-5p<br>miR-195-5p<br>miR-199a-3p<br>miR-214-3p<br>miR-222-3p<br>miR-342-3p<br>miR-378a-3p | Control: 10<br>Ischemic DCM: 25<br>Idiopathic DCM: 25                                 | Control: 59,8 ± 7,8<br>Ischemic DCM: 59,8 ± 9,4<br>Idiopathic DCM: 58,7 ± 12,7                                                       | Control: 40<br>Ischemic DCM: 12<br>Idiopathic DCM: 32                                        | Plasma | NA                                                      | Qiagen miScript RT II<br>Kit                                                | qRT-PCR, Qiagen<br>QuantiTect SYBR Green PCR<br>Master Mix, miScript Primer<br>Assay                                                                                                                                                                                  | SNORD61, miRTC                        | Ni-IDCM | Healthy Controls,<br>Ischemic DCM                                                                     |
| [13] | 122 | miR-381                                                                                                                                                                                                                                                                                                                                                                                                                        | 26/33                                                                                 | NA                                                                                                                                   | NA                                                                                           | Serum  | NA                                                      | Yeasen TRIzol                                                               | qRT-PCR, Tiangen miRcute<br>miRNA cDNA First Strand                                                                                                                                                                                                                   | U6                                    | MCI     | Healthy Controls                                                                                      |

|      |     |                                                                                                                                 |                                                        |                                                                                    |                                                                  |                                        |                                     |                                                              |                                                                                                                                                                                          |                     |         |                                                                                                                             |
|------|-----|---------------------------------------------------------------------------------------------------------------------------------|--------------------------------------------------------|------------------------------------------------------------------------------------|------------------------------------------------------------------|----------------------------------------|-------------------------------------|--------------------------------------------------------------|------------------------------------------------------------------------------------------------------------------------------------------------------------------------------------------|---------------------|---------|-----------------------------------------------------------------------------------------------------------------------------|
|      |     |                                                                                                                                 |                                                        |                                                                                    |                                                                  |                                        |                                     |                                                              | Synthesis Kit, Tiangen miRNA RT-PCR kit, own primers (sequences provided)                                                                                                                |                     |         |                                                                                                                             |
| [14] | 125 | miR-25                                                                                                                          | Control: 23<br>HHD: 15<br>HHDF: 12<br>DCM: 9<br>OMI: 8 | Control: 62±3<br>HHD: 61.4±2.4<br>HHDF: 70.6±2.6<br>DCM: 70.6±2.6<br>OMI: 72.8±3.6 | Control: 34,8<br>HHD: 61,1<br>HHDF: 44,4<br>DCM: 25<br>OMI: 37,5 | Serum                                  | NA                                  | Invitrogen TRIzol LS                                         | qRT-PCR, Promega MMLV Reverse Transcriptase Kit, Roche Fast Start Universal SYBR Green Master Mix, Ribobio miRNA primers                                                                 | Ribobio ath-miR156a | Ni-IDCM | Healthy Controls, Hypertensive Heart Disease, Hypertensive Heart Disease leading resulting in Heart Failure, Remote Infarct |
| [15] | 151 | miR-21<br>miR-126<br>miR-133<br>miR-146b<br>miR-155<br>miR-206                                                                  | InfDCM: 60<br>DCM: 29                                  | InfDCM: 47 ± 15<br>DCM: 43 ± 14                                                    | InfDCM: 28<br>DCM: 24                                            | Plasma                                 | NA                                  | miRNeasyMini Kit                                             | qRT-PCR, miScript PCR system                                                                                                                                                             | miR-39–1            | InfDCM  | Non-inflammatory DCM                                                                                                        |
| [16] | 158 | miR-21<br>miR-26<br>miR-29<br>miR-30<br>miR-133a                                                                                | 70 / 7                                                 | NA                                                                                 | NA                                                               | EMB                                    | NA                                  | Life Technologies mirVana kit                                | qRT-PCR, TaqMan Advanced MicroRNA cDNA Synthesis Kit, TaqMan Advanced Master Mix, TaqMan Advanced Assays                                                                                 | NA                  | Ni-IDCM | Healthy Controls                                                                                                            |
| [17] | 160 | miR-1-3p<br>miR-21-5p                                                                                                           | 40/29                                                  | 24 ± 7 / 23 ± 6                                                                    | 80 / 79                                                          | Peripheral blood mononuclear cells     | NA                                  | Stem Cell Technologies Lymphoprep / Ambion Tri-Reagent       | qRT-PCR, Clontech miR-X miRNA First-Strand Synthesis Kit, Kapa Biosystems KAPA SYBR FAST qPCR Kit                                                                                        | U6                  | MCI     | Healthy Controls                                                                                                            |
| [18] | 171 | miR-126<br>miR-146a<br>miR-155<br>miR-361-5p<br>miR-423-5p                                                                      | 45/39                                                  | 47.76 ± 12.28 /<br>47.59 ± 11.85                                                   | 28.9 / 35.9                                                      | Plasma                                 | NA                                  | mirVana PARIS kit (AM1556, Ambion)                           | qRT-PCR, Applied Biosystems TaqMan MicroRNA Reverse Kit, TaqMan! MicroRNA Assay, Universal PCR Master Mix                                                                                | Qiagen cel-miRNA-39 | Ni-IDCM | Healthy Controls                                                                                                            |
| [19] | 172 | miR-185                                                                                                                         | 50 / 41                                                | 45 ± 0.28 / 42 ± 0.31                                                              | 38 / 39                                                          | B cells isolated from PBMC, and plasma | NA                                  | TRIzol reagent (Invitrogen)                                  | qRT-PCR, TaqMan MicroRNA Reverse Transcription kit, TaqMan Universal PCR Master Mix Kit                                                                                                  | NA                  | Ni-IDCM | Healthy Controls                                                                                                            |
| [20] | 202 | miR-217<br>miR-543                                                                                                              | 30 / NA                                                | MCI: from 9 months to 12 years old                                                 | MCI: 43                                                          | Blood                                  | NA                                  | TRIzol® reagent (Invitrogen; Thermo Fisher Scientific, Inc.) | qRT-PCR, PrimeScript RT Reagent Kit (Takara Bio, Inc.), SYBR Premix Ex Taq (Takara Bio, Inc.), house made primers (sequence provided)                                                    | U6                  | MCI     | Healthy subjects                                                                                                            |
| [21] | 203 | miR-21<br>miR-30a<br>miR-125b<br>miR-146a<br>miR-155<br>miR-192<br>miR-223-3p<br>miR-320a                                       | FM: 99<br>Non-FM: 32<br>Control: 105                   | FM: Median:40<br>NFM: Median 33                                                    | FM: 40<br>NFM 28.1                                               | Serum exosomes                         | Illumina sequencing (Illumina, USA) | mirVana miRNA isolation kit (Thermo Fisher, MA, USA)         | qRT-PCR, Ribobio miRNA qPCR primer set                                                                                                                                                   | miR-39              | MCI     | Healthy subjects                                                                                                            |
| [22] | 209 | miR-98                                                                                                                          | 50 / 50                                                | NA                                                                                 | NA                                                               | Plasma                                 | NA                                  | RNA extraction kit (Invitrogen, Chicago, IL, USA)            | qRT-PCR, Toyobo SYBR Green                                                                                                                                                               | U6                  | MCI     | Healthy subjects                                                                                                            |
| [23] | 210 | miR-1<br>miR-10a-5p<br>miR-16-5p<br>miR-21-5p<br>miR-24-3p<br>miR-92a-3p<br>miR-125<br>miR-130b-3p<br>miR-132-3p<br>miR-146a-5p | 36 / 35                                                | 12,1 ± 2,1 / 11,1 ± 2,3                                                            | 52,8 / 45.7                                                      | Plasma                                 | NA                                  | Roche High Pure miRNA Isolation Kit                          | qRT-PCR, Applied Biosystems TaqMan MicroRNA Reverse Transcription Kit, Applied Biosystems TaqMan PreAmp Master Mix 29, Applied Biosystems Megaplex Human Primer Pools Set v3.0, Fluidigm | NA                  | MCI     | Healthy subjects                                                                                                            |

|      |     |                                                                                                                                     |                                                |                                                                       |                                                                    |                |                                    |                                                               |                                                                                                                                                        |               |         |                                                                                    |
|------|-----|-------------------------------------------------------------------------------------------------------------------------------------|------------------------------------------------|-----------------------------------------------------------------------|--------------------------------------------------------------------|----------------|------------------------------------|---------------------------------------------------------------|--------------------------------------------------------------------------------------------------------------------------------------------------------|---------------|---------|------------------------------------------------------------------------------------|
|      |     | miR-155-5p<br>miR-196a-5p<br>miR-221-3p<br>miR-223-3p<br>miR-320a<br>miR-499a-5p                                                    |                                                |                                                                       |                                                                    |                |                                    |                                                               | 96.96 Dynamic Array<br>Integrated Fluid Circuits                                                                                                       |               |         |                                                                                    |
| [24] | 231 | miR-93<br>miR-106a<br>miR-146b<br>miR-155<br>miR-511<br>miR-212<br>miR-889                                                          | 4 / 6                                          | 39 ± 20 / 38 ± 11                                                     | 0 / 33.3                                                           | EMB            | NA                                 | Ambion miRVANA<br>isolation kit                               | MicroArray (Illumina<br>Human miRNAv2<br>Expression Panel arrays)                                                                                      | NA            | MCI     | Healthy subjects                                                                   |
| [25] | 243 | miR-29                                                                                                                              | 52 / 32                                        | Adult population<br>51 / 42,5<br><br>Pediatric population<br>4 / 12,7 | Adult population<br>50 / 50<br><br>Pediatric population<br>52 / 46 | EMB            | NA                                 | Ambion MirVanaTM<br>RNA Isolation Kit                         | qRT-PCR, Qiagen miScript<br>Reverse Transcription Kit,<br>Primers sequences available                                                                  | U6            | Ni-IDCM | Healthy subjects                                                                   |
| [26] | 251 | miR-151a-3p<br>miR-3960<br>miR-4763-3p<br>miR-4821                                                                                  | 20 / 10                                        | 36,55 ± 18,64 / 28,5 ± 1,84                                           | 55/30                                                              | Plasma         | Agilent miRNA<br>Microarray System | Invitrogen TRIzol-LS,<br>Qiagen RNeasy mini<br>kit            | qRT-PCR, Ribobio Bulge-<br>Loop miRNA qRT-PCR<br>Starter Kit, Power SYBR<br>Green PCR Master Mix,<br>Ribobio primers                                   | Cel-miR-39-3p | MCI     | Healthy subjects                                                                   |
| [27] | 284 | miR-21<br>miR-29b<br>miR-34a<br>miR-99a<br>miR-107<br>miR-125b<br>miR-139<br>miR-142-3p<br>miR-154<br>miR-326<br>miR-497<br>miR-502 | Ni-IDCM: 19<br>ICM:15<br>Controls: 23          | Ni-IDCM: 63,8 ± 1,8<br>ICM: 67 ± 1,8<br>Controls: NA                  | Ni-IDCM: 31,6<br>ICM:13<br>Controls: NA                            | PBMC           | qRT-PCR panel                      | NA                                                            | qRT-PCR, Appplied<br>Biosystems TaqMan Real<br>Time Assay                                                                                              | miR-16        | Ni-IDCM | Healthy subjects,<br>Ischemic<br>Cardiomyopathy                                    |
| [28] | 287 | miR-1<br>miR-21<br>miR-27b<br>miR-30a<br>miR-125a<br>miR-133a<br>miR146b<br>miR-148a<br>miR-155<br>miR-181d                         | 23 / 12                                        | NA                                                                    | NA                                                                 | Serum exosomes | NA                                 | TRIZOL Kit (Invitrogen,<br>United States)                     | qRT-PCR, TaqMan miRNA<br>RT-Real Time PCR, TaqMan<br>miR- NA RT-Real Time PCR,<br>miRNA-specific TaqMan<br>MGB probes                                  | miR-16        | MCI     | Healthy subjects                                                                   |
| [29] | 305 | miR-23b-3p<br>miR-24-1-3p<br>miR-27b-3p<br>miR-155-5p                                                                               | ICM: 9<br>Ni-IDCM: 9<br>HOCM: 12<br>Control: 9 | ICM: 53 ± 5<br>Ni-IDCM: 52 ± 4<br>HOCM: 51 ± 6<br>Control: 52 ± 7     | 0                                                                  | Heart tissue   | NA                                 | Bioline Trisure                                               | qRT-PCR, Applied<br>Biosystems cDNA for<br>TaqMan miRNA, Applied<br>Biosystems TaqMan<br>MicroRNA Reverse<br>Transcription Kit, TaqMan<br>miRNA assays | RNU48         | Ni-IDCM | Healthy subjects,<br>Hypertrophic<br>Cardiomyopathy,<br>Ischemic<br>Cardiomyopathy |
| [30] | 334 | miR-24                                                                                                                              | DCM: 8<br>ICM: 5<br>Control: 4                 | DCM: 41,1 ± 5,3<br>ICM: 56,4 ± 4,9<br>Control: 35,0 ± 4,6             | NA                                                                 | Heart tissue   | NA                                 | TRIZOL Kit (Invitrogen,<br>United States)                     | qRT-PCR, Ribobio<br>microRNA-specific reverse-<br>transcription primers,<br>Stratagen Brilliant II SYBR<br>Green QPCR master mix                       | U6            | Ni-IDCM | Healthy subjects,<br>Ischemic<br>Cardiomyopathy                                    |
| [31] | 352 | miR-92b-5p<br>miR-192-5p<br>miR-320a                                                                                                | 43 / 34                                        | 62±2 / 57±2                                                           | 53.5 / 32.4                                                        | Serum exosomes | NA                                 | miRNA Quick<br>Extraction Kit<br>(Bioteke, Beijing,<br>China) | qRT-PCR                                                                                                                                                | miR-451b      | Ni-IDCM | Healthy subjects                                                                   |
| [32] | 380 | miR-1<br>miR-21<br>miR-126<br>miR-133a<br>miR-146b<br>miR-155                                                                       | 76 / 22                                        | 45 ± 15 / 53 ± 13                                                     | 19 / 45                                                            | EMB            | NA                                 | miRNeasy Mini Kit<br>(Qiagen, Hilden,<br>Germany)             | qRT-PCR, Qiagen miScript<br>PCR System, Qiagen Primers                                                                                                 | NA            | InfDCM  | Ni-IDCM                                                                            |

|      |     |                                                                                                                                                                      |                                               |                                                                         |                                             |              |                                                                                 |                                                                |                                                                                                                                                          |            |         |                                                                     |
|------|-----|----------------------------------------------------------------------------------------------------------------------------------------------------------------------|-----------------------------------------------|-------------------------------------------------------------------------|---------------------------------------------|--------------|---------------------------------------------------------------------------------|----------------------------------------------------------------|----------------------------------------------------------------------------------------------------------------------------------------------------------|------------|---------|---------------------------------------------------------------------|
|      |     | miR-206<br>miR-208b                                                                                                                                                  |                                               |                                                                         |                                             |              |                                                                                 |                                                                |                                                                                                                                                          |            |         |                                                                     |
| [33] | 386 | miR-1<br>miR-15b<br>miR-19a<br>miR-19b<br>miR-99b<br>miR-101<br>miR-125b<br>miR-133<br>miR-208<br>miR-214                                                            | ICM: 19<br>DCM: 25<br>AS: 13<br>Control:10    | ICM: 6.6 ± 0.6<br>DCM: 6.0 ± 1.5<br>AS: 8.6 ± 0.7<br>Control: 5.8 ± 1.4 | ICM: 11<br>DCM: 32<br>AS: 54<br>Control: 40 | Heart tissue | Bead based method                                                               | TRIzol (Invitrogen,<br>Carlsbad, CA)                           | qRT-PCR                                                                                                                                                  | NA         | Ni-IDCM | Healthy subjects,<br>Ischemic<br>Cardiomyopathy,<br>Aortic Stenosis |
| [34] | 388 | miR-21<br>miR-125b<br>miR-146b<br>miR-155<br>miR-208b<br>miR-214<br>miR-375<br>miR-499                                                                               | 8 / 8                                         | NA                                                                      | NA                                          | EMB          | NA                                                                              | TRIzol (Invitrogen Life<br>Technologies,<br>Carlsbad, CA, USA) | qRT-PCR, Applied<br>Biosystems TaqMan miRNA<br>RT-Real Time PCR                                                                                          | U6         | MCI     | Healthy subjects                                                    |
| [35] | 420 | miR-199a<br>miR-199b<br>miR-214                                                                                                                                      | 42 / 20                                       | 45,4 ± 2 / 44,4 ± 3,9                                                   | 9,5 / 35                                    | Heart tissue | NA                                                                              | Trizol reagent<br>(Invitrogen)                                 | qRT-PCR, Applied<br>Biosystems TaqMan miRNA<br>assays, Applied Biosystems<br>TaqMan MicroRNA Reverse<br>Transcription Kit                                | U6         | Ni-IDCM | Healthy subjects                                                    |
| [36] | 446 | miR-1<br>miR-146b                                                                                                                                                    | 119 / 110                                     | 6.7±2.9 / 7.2 ± 3.0                                                     | 46.2 / 46                                   | Serum        | NA                                                                              | TRIZOL Kit (Invitrogen,<br>United States)                      | qRT-PCR, Applied<br>Biosystems TaqMan<br>MicroRNA Reverse<br>Transcription Kit                                                                           | Beta-actin | MCI     | Healthy subjects                                                    |
| [37] | 448 | miR-1<br>miR-21<br>miR-27b<br>miR-29b<br>miR-30a<br>miR-125a<br>miR-133a<br>miR-146b<br>miR-148a<br>miR-155<br>miR-199a<br>miR-208b<br>miR-223<br>miR-375<br>miR-499 | 6 / 6                                         | NA                                                                      | NA                                          | Heart tissue | NA                                                                              | Trizol (Invitrogen,<br>Carlsbad, CA, USA)                      | qRT-PCR, Applied<br>Biosystems aqMan<br>MicroRNA Reverse<br>Transcription Kit, TaqMan<br>Universal PCR Master Mix,<br>iRNA-specific TaqMan MGB<br>probes | U6         | MCI     | Healthy subjects                                                    |
| [38] | 463 | miR-1<br>miR-7<br>miR-29b<br>miR-125b<br>miR-145<br>miR-181b<br>miR-214<br>miR-342<br>miR-378                                                                        | 50 / 20                                       | 54 ± 1 / 51 ± 2                                                         | 34 / 55                                     | Heart tissue | miRNA microarray (Ohio<br>State Comprehensive<br>Cancer Centre, version<br>3.0) | TRIzol (Invitrogen)                                            | qRT-PCR, Taqman real time<br>mix                                                                                                                         | RNU6B      | MCI     | Healthy subjects                                                    |
| [39] | 669 | miR-1-3p<br>miR-17-5p<br>miR-30c-5p<br>miR-107<br>miR-133a-5p<br>miR-193a-5p<br>miR-208a-5p<br>miR-301a-3p<br>miR-301b-3b<br>miR-495-3p<br>miR-1261                  | Pediatric<br>36 / 13<br><br>Adult:<br>11 / 13 | NA                                                                      | Pediatric<br>54 / 53<br><br>Adult<br>3 / 39 | Heart tissue | Illumina sequencing                                                             | Qiagen QIAzol /<br>Ambion mirVana Kit                          | qRT-PCR, miScript SYBR<br>Green PCR Kit, Qiagen<br>miScript II cDNA synthesis,<br>miRNAs primers provided                                                | 18s        | Ni-IDCM | Healthy subjects                                                    |

|      |      |                                                                                                                                                                                                                                          |                             |                                                 |                                |              |                                                                           |                                                                |                                                                                                                                                                                                                                                   |             |         |                                                 |
|------|------|------------------------------------------------------------------------------------------------------------------------------------------------------------------------------------------------------------------------------------------|-----------------------------|-------------------------------------------------|--------------------------------|--------------|---------------------------------------------------------------------------|----------------------------------------------------------------|---------------------------------------------------------------------------------------------------------------------------------------------------------------------------------------------------------------------------------------------------|-------------|---------|-------------------------------------------------|
| [40] | 679  | miR-146b                                                                                                                                                                                                                                 | 48 / 40                     | 6,46 ± 2,17 / 6,37 ± 2,26                       | 47.92 / 52.5                   | Aerum        | NA                                                                        | total miRNAs<br>extraction kit (Qiagen,<br>Germany, HZ101-633) | qRT-PCR, M-MLV reverse<br>transcription kit (solarbio,<br>USA, RP1100); qReal-time<br>PRC kit (Invitrogen, Grand<br>Island, NY, USA, article<br>number: C28025-032); SYBR<br>Green qPCR Master Mix Kit<br>(Medchemexpress, USA,<br>HY-K0501 Ltd.) | U6          | MCI     | Healthy subjects                                |
| [41] | 731  | Let-7f-5p<br>Let-7g-5p<br>Let-7i-5p<br>miR-24-3p<br>miR-26a-5p<br>miR-27a-3p<br>miR-27b-3p<br>miR-98-5p<br>miR-126-3p<br>miR-142-5p<br>miR-143-3p                                                                                        | 16 / 12                     | 5.27±4.13 / 5.49±3.69                           | 62.5 / 67                      | Serum        | Illumina sequencing                                                       | NA                                                             | qRT-PCR                                                                                                                                                                                                                                           | NA          | Ni-IDCM | Healthy subjects                                |
| [42] | 943  | miR-206<br>miR-297<br>miR-451a<br>miR-486-3p<br>miR-595<br>miR-1180-3p<br>miR-3064-5p<br>miR-3148<br>miR-4701-3p<br>miR-4793-3p<br>miR-6785-5p<br>miR-6796-5p<br>miR-6807-5p<br>miR-6847-5p<br>miR-6849-5p<br>miR-6856-5p<br>miR-7844-5p | 45 / 45                     | 50 ± 14 / 52 ± 12                               | 33.3 / 37.8                    | CD4+ T cells | Microarray Affymetrix<br>GeneChip® miRNA 4.1<br>arrays                    | TRIZOL Kit (Invitrogen,<br>United States)                      | microArray<br>GeneChip® miRNA 4.1<br>arrays (Affymetrix)                                                                                                                                                                                          | U6          | Ni-IDCM | Healthy subjects                                |
| [43] | 1033 | miR-208b                                                                                                                                                                                                                                 | DCM:5<br>ICM:5<br>Control:5 | DCM: 39 ± 10<br>ICM: 57 ± 11<br>Control: 29 ± 9 | DCM:60<br>ICM:20<br>Control:40 | Heart tissue | NA                                                                        | Guanidinium<br>thiocyanate-phenol-<br>chloroform method        | qRT-PCR, Exiqon miRCURY<br>LNA™ Universal RT<br>microRNA PCR kit                                                                                                                                                                                  | miR-103a-3p | Ni-IDCM | Healthy subjects,<br>Ischemic<br>Cardiomyopathy |
| [44] | 1304 | miR-9-3p<br>miR-16-2-3p<br>miR-21-3p<br>miR-21-5p<br>miR-144-3p<br>miR-144-5p<br>miR-338-3p<br>miR-363-3p<br>miR-451a<br>miR-551b-3p<br>miR-770-5p                                                                                       | NA                          | NA                                              | NA                             | Heart tissue | miRNA microarray,<br>Affymetrix 4.0 (OE<br>Biotech's, Shanghai,<br>China) | TRIzol; RNeasy mini<br>kit (Qiagen, Hilden,<br>Germany)        | qRT-PCR                                                                                                                                                                                                                                           | NA          | Ni-IDCM | Healthy subjects                                |
| [45] | 1348 | miR-21<br>miR-126<br>miR-133a<br>miR-146b<br>miR-155<br>miR-206                                                                                                                                                                          | 81 / 22                     | NA                                              | NA                             | Heart tissue | NA                                                                        | NA                                                             | qRT-PCR                                                                                                                                                                                                                                           | NA          | MCI     | Non-inflammatory<br>DCM                         |
| [46] | 1442 | miR-208                                                                                                                                                                                                                                  | 56 / 21                     | NA                                              | NA                             | Heart tissue | NA                                                                        | Ambion mirVana Paris<br>miRNA isolation kit                    | qRT-PCR, high-capacity<br>cDNA Archive Kit, TaqMan<br>microRNA assays                                                                                                                                                                             | U6          | Ni-IDCM | Healthy subjects                                |
| [47] | 1454 | miR-1<br>miR-21<br>miR-26b<br>miR-133a<br>miR-208b<br>miR-499                                                                                                                                                                            | 22 / 20                     | 29 ± 10 / 30 ± 9                                | 18.2 / 20                      | PBMC         | NA                                                                        | NA                                                             | qRT-PCR                                                                                                                                                                                                                                           | NA          | MCI     | Healthy subjects                                |
| [48] | 1478 | miR-21                                                                                                                                                                                                                                   | 29 / 20                     | AMC: 32±10                                      | AMC: 34,5                      | PBMC         | NA                                                                        | NA                                                             | qRT-PCR                                                                                                                                                                                                                                           | NA          | MCI     | Healthy subjects                                |

|      |      |                                                                                                                                                                                                         |                                                                                       |                                                                                                                     |                                                                                               |              |                                     |                                                  |                                                                           |    |         |                                                          |
|------|------|---------------------------------------------------------------------------------------------------------------------------------------------------------------------------------------------------------|---------------------------------------------------------------------------------------|---------------------------------------------------------------------------------------------------------------------|-----------------------------------------------------------------------------------------------|--------------|-------------------------------------|--------------------------------------------------|---------------------------------------------------------------------------|----|---------|----------------------------------------------------------|
|      |      |                                                                                                                                                                                                         |                                                                                       | Control: 30±9                                                                                                       | Control: 25                                                                                   |              |                                     |                                                  |                                                                           |    |         |                                                          |
| [49] | 1485 | miR-21                                                                                                                                                                                                  | 55 / 22                                                                               | 30 ± 12 / 30 ± 9                                                                                                    | 27,3 / 25                                                                                     | PBMC         | NA                                  | NA                                               | qRT-PCR                                                                   | NA | MCI     | Healthy subjects                                         |
| [50] | 1497 | miR-208b                                                                                                                                                                                                | 55 / 22                                                                               | 30 ± 12 / 30 ± 9                                                                                                    | 27,3 / 25                                                                                     | PBMC         | NA                                  | NA                                               | qRT-PCR                                                                   | NA | MCI     | Healthy subjects                                         |
| [51] | 1542 | let-7f-5p<br>miR-135b-5p<br>miR-155-5p<br>miR-190a-5p<br>miR-296-5p<br>miR-339-5p<br>miR-365a-3p<br>miR-422a<br>miR-489-3p<br>miR-520e<br>miR-532-5p<br>miR-590-5p<br>miR-601<br>miR-660-5p<br>miR-1290 | CVB3 perseverance DCM: 7<br>CVB3 eliminates DCM: 6<br>Control: 6<br>Adenovirus DCM: 4 | CVB3 perseverance DCM: 50,2 ± 7,3<br>CVB3 eliminates DCM: 45,2 ± 13,2<br>Control: 48 ± 12<br>Adenovirus DCM: 52 ± 9 | CVB3 perseverance DCM: 28,6<br>CVB3 eliminates DCM: 16,7<br>Control: 50<br>Adenovirus DCM: 25 | EMB          | Microarray Affymetrix U133 plus 2.0 | Applied Biosystems mirVana miRNA Isolation Kit   | Microarray Affymetrix U133 plus 2.0                                       | NA | InfDCM  | Healthy subjects                                         |
| [52] | 2179 | miR-221<br>miR-222                                                                                                                                                                                      | 18 / 34                                                                               | NA                                                                                                                  | NA                                                                                            | Heart tissue | NA                                  | miRVANA extraction kit (Ambion)                  | qRT-PCR                                                                   | NA | MCI     | DCM                                                      |
| [53] | 2293 | miR-10b-5p<br>miR-362-5p                                                                                                                                                                                | 6 / 3                                                                                 | 53.5±14.8 / 53.7±7.37                                                                                               | 50 / 33                                                                                       | Serum        | qRT-PCR Panel                       | miRCURY RNA Isolation Biofluids Kit              | qRT-PCR, miRCURY Locked Nucleic Acid and Universal RT microRNA PCR system | NA | Ni-IDCM | Healthy subjects                                         |
| [54] | 2323 | miR-21<br>miR-34a<br>miR-423<br>miR-208a<br>miR-499a-5p                                                                                                                                                 | DCM: 9<br>ICM: 7<br>Control: 10                                                       | NA                                                                                                                  | NA                                                                                            | Plasma       | NA                                  | NA                                               | qRT-PCR                                                                   | NA | Ni-IDCM | Healthy subjects, Ischemic Cardiomyopathy                |
| [55] | 2540 | miR-29<br>miR-122<br>miR-144<br>miR-206<br>miR-208a<br>miR-223<br>miR-499<br>miR-451-DICER1<br>miR-486<br>miR-3940                                                                                      | DCM: 6<br>ICM: 7<br>Control: 3<br>Control fetus: 3                                    | NA                                                                                                                  | NA                                                                                            | Heart tissue | NA                                  | Guanidinium thiocyanate-phenol-chloroform method | Illumina sequencing                                                       | NA | Ni-IDCM | Healthy subjects, healthy fetus, Ischemic Cardiomyopathy |

Orange marked studies performed histological assessment of EMB or heart tissue samples.

- Blanco-Domínguez, R.; Sánchez-Díaz, R.; de la Fuente, H.; Jiménez-Borreguero, L.J.; Matesanz-Marín, A.; Relaño, M.; Jiménez-Alejandre, R.; Linillos-Pradillo, B.; Tsilingiri, K.; Martín-Mariscal, M.L.; et al. A Novel Circulating MicroRNA for the Detection of Acute Myocarditis. *New England Journal of Medicine* **2021**, *384*, 2014-2027, doi:10.1056/NEJMoa2003608.
- Brundin, M.; Wågsäter, D.; Alehagen, U.; Carlhäll, C.-J. Circulating microRNA-29-5p can add to the discrimination between dilated cardiomyopathy and ischaemic heart disease. *ESC Heart Failure* **2021**, *8*, 3865-3874, doi:https://doi.org/10.1002/ehf2.13458.
- Calderon-Dominguez, M.; Belmonte, T.; Quezada-Feijoo, M.; Ramos, M.; Calderon-Dominguez, J.; Campuzano, O.; Mangas, A.; Toro, R. Plasma microrna expression profile for reduced ejection fraction in dilated cardiomyopathy. *Scientific Reports* **2021**, *11*, 7517, doi:10.1038/s41598-021-87086-1.
- Ishiguro, T.; Hayashi, M.; Fujiwara, W.; Okumura, S.; Yoshinaga, M.; Yamada, R.; Ueda, S.; Ito, T.; Niwa, Y.; Miyazaki, A.; et al. Circulating miR-489 as a potential new biomarker for idiopathic dilated cardiomyopathy. *Fujita Medical Journal* **2021**, *7*, 18-22, doi:10.20407/fmj.2020-001.
- Jiao, M.; You, H.-Z.; Yang, X.-Y.; Yuan, H.; Li, Y.-L.; Liu, W.-X.; Jin, M.; Du, J. Circulating microRNA signature for the diagnosis of childhood dilated cardiomyopathy. *Scientific Reports* **2018**, *8*, 724, doi:10.1038/s41598-017-19138-4.
- Wang, H.; Chen, F.; Tong, J.; Li, Y.; Cai, J.; Wang, Y.; Li, P.; Hao, Y.; Tian, W.; Lv, Y.; et al. Circulating microRNAs as novel biomarkers for dilated cardiomyopathy. *Cardiol J* **2017**, *24*, 65-73, doi:10.5603/CJ.a2016.0097.
- Chen, J.H.; He, J.; Zhou, R.; Zheng, N. [Expression and Significance of Circulating microRNA-29b in Adult Fulminant Myocarditis]. *Zhongguo Yi Xue Ke Xue Yuan Xue Bao* **2022**, *44*, 102-109, doi:10.3881/j.issn.1000-503X.14043.
- Aleshcheva, G.; Pietsch, H.; Escher, F.; Schultheiss, H.-P. MicroRNA profiling as a novel diagnostic tool for identification of patients with inflammatory and/or virally induced cardiomyopathies. *ESC Heart Failure* **2021**, *8*, 408-422, doi:https://doi.org/10.1002/ehf2.13090.
- Enes Coşkun, M.; Kervancioğlu, M.; Öztuzcu, S.; Yılmaz Coşkun, F.; Ergün, S.; Başpınar, O.; Kılınç, M.; Temel, L.; Coşkun, M.Y. Plasma microRNA profiling of children with idiopathic dilated cardiomyopathy. *Biomarkers* **2016**, *21*, 56-61, doi:10.3109/1354750X.2015.1118533.
- Yang, H.; Shan, L.; Gao, Y.; Li, L.; Xu, G.; Wang, B.; Yin, X.; Gao, C.; Liu, J.; Yang, W. MicroRNA-181b Serves as a Circulating Biomarker and Regulates Inflammation in Heart Failure. *Disease Markers* **2021**, *2021*, 4572282, doi:10.1155/2021/4572282.
- Corsten, M.F.; Dennert, R.; Jochems, S.; Kuznetsova, T.; Devaux, Y.; Hofstra, L.; Wagner, D.R.; Staessen, J.A.; Heymans, S.; Schroen, B. Circulating MicroRNA-208b and MicroRNA-499 Reflect Myocardial Damage in Cardiovascular Disease. *Circulation: Cardiovascular Genetics* **2010**, *3*, 499-506, doi:10.1161/CIRCGENETICS.110.957415.



12. Onrat, S.T.; Onrat, E.; Ercan Onay, E.; Yalım, Z.; Avşar, A. The Genetic Determination of the Differentiation Between Ischemic Dilated Cardiomyopathy and Idiopathic Dilated Cardiomyopathy. *Genetic Testing and Molecular Biomarkers* **2018**, *22*, 644-651, doi:10.1089/gtmb.2018.0188.
13. Zhang, Y.; Sun, L.; Sun, H.; Yu, Z.; Liu, X.; Luo, X.; Li, C.; Sun, D.; Li, T. MicroRNA-381 protects myocardial cell function in children and mice with viral myocarditis via targeting cyclooxygenase-2 expression. *Exp Ther Med* **2018**, *15*, 5510-5516, doi:10.3892/etm.2018.6082.
14. Li, H.; Xie, Y.; Liu, Y.; Qi, Y.; Tang, C.; Li, X.; Zuo, K.; Sun, D.; Shen, Y.; Pang, D.; et al. Alteration in microRNA-25 expression regulate cardiac function via renin secretion. *Experimental Cell Research* **2018**, *365*, 119-128, doi:https://doi.org/10.1016/j.yexcr.2018.02.029.
15. Obradovic, D.; Rommel, K.-P.; Blazek, S.; Klingel, K.; Gutberlet, M.; Lücke, C.; Büttner, P.; Thiele, H.; Adams, V.; Lurz, P.; et al. The potential role of plasma miR-155 and miR-206 as circulatory biomarkers in inflammatory cardiomyopathy. *ESC Heart Failure* **2021**, *8*, 1850-1860, doi:https://doi.org/10.1002/ehf2.13304.
16. Rubiś, P.; Totoń-Żurańska, J.; Wiśniowska-Śmiałek, S.; Dziewięcka, E.; Kołton-Wróz, M.; Wołkow, P.; Pitera, E.; Rudnicka-Sosin, L.; Garlitski, A.C.; Gackowski, A.; et al. The relationship between myocardial fibrosis and myocardial microRNAs in dilated cardiomyopathy: A link between mir-133a and cardiovascular events. *Journal of Cellular and Molecular Medicine* **2018**, *22*, 2514-2517, doi:https://doi.org/10.1111/jcmm.13535.
17. Marketou, M.; Kontaraki, J.; Patrianakos, A.; Kochiadakis, G.; Anastasiou, I.; Fragkiadakis, K.; Plevritaki, A.; Papadaki, S.T.; Chlouverakis, G.; Parthenakis, F. Peripheral Blood MicroRNAs as Potential Biomarkers of Myocardial Damage in Acute Viral Myocarditis. *Genes* **2021**, *12*, doi:10.3390/genes12030420.
18. Fan, K.L.; Zhang, H.F.; Shen, J.; Zhang, Q.; Li, X.L. Circulating microRNAs levels in Chinese heart failure patients caused by dilated cardiomyopathy. *Indian Heart J* **2013**, *65*, 12-16, doi:10.1016/j.ihj.2012.12.022.
19. Yu, M.; Liang, W.; Xie, Y.; Long, Q.; Cheng, X.; Liao, Y.-H.; Yuan, J. Circulating miR-185 might be a novel biomarker for clinical outcome in patients with dilated cardiomyopathy. *Scientific Reports* **2016**, *6*, 33580, doi:10.1038/srep33580.
20. Xia, K.; Zhang, Y.; Sun, D. miR-217 and miR-543 downregulation mitigates inflammatory response and myocardial injury in children with viral myocarditis by regulating the SIRT1/AMPK/NF-κB signaling pathway. *Int J Mol Med* **2020**, *45*, 634-646, doi:10.3892/ijmm.2019.4442.
21. Zhang, Y.; Li, X.; Wang, D.; Jiang, X.; Zhang, M.; Lv, K. Serum exosome microRNA panel as a noninvasive biomarker for molecular diagnosis of fulminant myocarditis. *Molecular Therapy - Methods & Clinical Development* **2021**, *20*, 142-151, doi:https://doi.org/10.1016/j.omtm.2020.11.006.
22. Zhang, B.Y.; Zhao, Z.; Jin, Z. Expression of miR-98 in myocarditis and its influence on transcription of the FAS/FASL gene pair. *Genet Mol Res* **2016**, *15*, doi:10.4238/gmr.15027627.
23. Gumus, G.; Giray, D.; Bobusoglu, O.; Tamer, L.; Karpuz, D.; Hallioglu, O. MicroRNA values in children with rheumatic carditis: a preliminary study. *Rheumatology International* **2018**, *38*, 1199-1205, doi:10.1007/s00296-018-4069-2.
24. Corsten, M.F.; Papageorgiou, A.; Verhesen, W.; Carai, P.; Lindow, M.; Obad, S.; Summer, G.; Coort, S.L.M.; Hazebroek, M.; van Leeuwen, R.; et al. MicroRNA Profiling Identifies MicroRNA-155 as an Adverse Mediator of Cardiac Injury and Dysfunction During Acute Viral Myocarditis. *Circulation Research* **2012**, *111*, 415-425, doi:10.1161/CIRCRESAHA.112.267443.
25. Woulfe, K.C.; Siomos, A.K.; Nguyen, H.; SooHoo, M.; Galambos, C.; Stauffer, B.L.; Sucharov, C.; Miyamoto, S. Fibrosis and Fibrotic Gene Expression in Pediatric and Adult Patients With Idiopathic Dilated Cardiomyopathy. *Journal of Cardiac Failure* **2017**, *23*, 314-324, doi:https://doi.org/10.1016/j.cardfail.2016.11.006.
26. Nie, X.; He, M.; Wang, J.; Chen, P.; Wang, F.; Lai, J.; Li, C.; Yu, T.; Zuo, H.; Cui, G.; et al. Circulating miR-4763-3p Is a Novel Potential Biomarker Candidate for Human Adult Fulminant Myocarditis. *Molecular Therapy - Methods & Clinical Development* **2020**, *17*, 1079-1087, doi:https://doi.org/10.1016/j.omtm.2020.05.005.
27. Voellenkle, C.; van Rooij, J.; Cappuzzello, C.; Greco, S.; Arcelli, D.; Di Vito, L.; Melillo, G.; Rigolini, R.; Costa, E.; Crea, F.; et al. MicroRNA signatures in peripheral blood mononuclear cells of chronic heart failure patients. *Physiological Genomics* **2010**, *42*, 420-426, doi:10.1152/physiolgenomics.00211.2009.
28. Fan, K.L.; Li, M.F.; Cui, F.; Feng, F.; Kong, L.; Zhang, F.H.; Hao, H.; Yin, M.X.; Liu, Y. Altered exosomal miR-181d and miR-30a related to the pathogenesis of CVB3 induced myocarditis by targeting SOCS3. *Eur Rev Med Pharmacol Sci* **2019**, *23*, 2208-2215, doi:10.26355/eurrev\_201903\_17268.
29. Glezeva, N.; Moran, B.; Collier, P.; Moravec, C.S.; Phelan, D.; Donnellan, E.; Russell-Hallinan, A.; O'Connor, D.P.; Gallagher, W.M.; Gallagher, J.; et al. Targeted DNA Methylation Profiling of Human Cardiac Tissue Reveals Novel Epigenetic Traits and Gene Dereglulation Across Different Heart Failure Patient Subtypes. *Circ Heart Fail* **2019**, *12*, e005765, doi:10.1161/circheartfailure.118.005765.
30. Zhang, H.B.; Li, R.C.; Xu, M.; Xu, S.M.; Lai, Y.S.; Wu, H.D.; Xie, X.J.; Gao, W.; Ye, H.; Zhang, Y.Y.; et al. Ultrastructural uncoupling between T-tubules and sarcoplasmic reticulum in human heart failure. *Cardiovasc Res* **2013**, *98*, 269-276, doi:10.1093/cvr/cvt030.
31. Wu, T.; Chen, Y.; Du, Y.; Tao, J.; Zhou, Z.; Yang, Z. Serum Exosomal MiR-92b-5p as a Potential Biomarker for Acute Heart Failure Caused by Dilated Cardiomyopathy. *Cell Physiol Biochem* **2018**, *46*, 1939-1950, doi:10.1159/000489383.
32. Besler, C.; Urban, D.; Watzka, S.; Lang, D.; Rommel, K.P.; Kandolf, R.; Klingel, K.; Thiele, H.; Linke, A.; Schuler, G.; et al. Endomyocardial miR-133a levels correlate with myocardial inflammation, improved left ventricular function, and clinical outcome in patients with inflammatory cardiomyopathy. *Eur J Heart Fail* **2016**, *18*, 1442-1451, doi:10.1002/ehf.579.
33. Ikeda, S.; Kong, S.W.; Lu, J.; Bisping, E.; Zhang, H.; Allen, P.D.; Golub, T.R.; Pieske, B.; Pu, W.T. Altered microRNA expression in human heart disease. *Physiological Genomics* **2007**, *31*, 367-373, doi:10.1152/physiolgenomics.00144.2007.
34. Chen, Z.G.; Liu, H.; Zhang, J.B.; Zhang, S.L.; Zhao, L.H.; Liang, W.Q. Upregulated microRNA-214 enhances cardiac injury by targeting ITCH during coxsackievirus infection. *Mol Med Rep* **2015**, *12*, 1258-1264, doi:10.3892/mmr.2015.3539.
35. Baumgarten, A.; Bang, C.; Tschirner, A.; Engelmann, A.; Adams, V.; von Haehling, S.; Doehner, W.; Pregla, R.; Anker, M.S.; Blecharz, K.; et al. TWIST1 regulates the activity of ubiquitin proteasome system via the miR-199/214 cluster in human end-stage dilated cardiomyopathy. *International Journal of Cardiology* **2013**, *168*, 1447-1452, doi:https://doi.org/10.1016/j.ijcard.2012.12.094.
36. Wang, D.; Li, T.; Cui, H.; Zhang, Y. Analysis of the Indicating Value of Cardiac Troponin I, Tumor Necrosis Factor-α, Interleukin-18, Mir-1 and Mir-146b for Viral Myocarditis among Children. *Cellular Physiology and Biochemistry* **2016**, *40*, 1325-1333, doi:10.1159/000453185.
37. Bao, J.L.; Lin, L. MiR-155 and miR-148a reduce cardiac injury by inhibiting NF-κB pathway during acute viral myocarditis. *Eur Rev Med Pharmacol Sci* **2014**, *18*, 2349-2356.
38. Naga Prasad, S.V.; Gupta, M.K.; Duan, Z.-H.; Surampudi, V.S.K.; Liu, C.-G.; Kotwal, A.; Moravec, C.S.; Starling, R.C.; Perez, D.M.; Sen, S.; et al. A unique microRNA profile in end-stage heart failure indicates alterations in specific cardiovascular signaling networks. *PLOS ONE* **2017**, *12*, e0170456, doi:10.1371/journal.pone.0170456.
39. Hailu, F.T.; Karimpour-Fard, A.; Toni, L.S.; Bristow, M.R.; Miyamoto, S.D.; Stauffer, B.L.; Sucharov, C.C. Integrated analysis of miRNA–mRNA interaction in pediatric dilated cardiomyopathy. *Pediatric Research* **2022**, *92*, 98-108, doi:10.1038/s41390-021-01548-w.
40. Yan, M.; Wang, J.; Wang, S.; Zhang, Y.; Liu, L.; Zhao, H. Expression Levels of MicroRNA-146b and Anti-Cardiac Troponin I in Serum of Children with Viral Myocarditis and Their Clinical Significance. *Iran J Public Health* **2021**, *50*, 510-519, doi:10.18502/ijph.v50i3.5592.
41. JIAO, M.; YOU, H.; WANG, Z.; GU, Y.; WANG, X.; LIANG, Y.; XIAO, Y.; JIN, M. Diagnosis of dilated cardiomyopathy in children based on microRNA sequencing technology [基于微小RNA测序技术的儿童扩张型心肌病的诊断学研究]. *Chinese J. Appl. Clin. Pediatr.* **2020**, *24*, 982-987.
42. Zeng, Z.; Wang, K.; Li, Y.; Xia, N.; Nie, S.; Lv, B.; Zhang, M.; Tu, X.; Li, Q.; Tang, T.; et al. Down-regulation of microRNA-451a facilitates the activation and proliferation of CD4<sup>+</sup> T cells by targeting Myc in patients with dilated cardiomyopathy. *Journal of Biological Chemistry* **2017**, *292*, 6004-6013, doi:10.1074/jbc.M116.765107.
43. Baán, J.A.; Varga, Z.V.; Leszek, P.; Kuśmierczyk, M.; Baranyai, T.; Dux, L.; Ferdinandy, P.; Braun, T.; Mandler, L. Myostatin and IGF-I signaling in end-stage human heart failure: a qRT-PCR study. *Journal of Translational Medicine* **2015**, *13*, 1, doi:10.1186/s12967-014-0365-0.



44. Tao, L.; Yang, L.; Huang, X.; Hua, F.; Yang, X. Reconstruction and Analysis of the lncRNA-miRNA-mRNA Network Based on Competitive Endogenous RNA Reveal Functional lncRNAs in Dilated Cardiomyopathy. *Front Genet* **2019**, *10*, 1149, doi:10.3389/fgene.2019.01149.
45. Besler, C.; Urban, D.; Watzka, S.; Klingel, K.; Kandolf, R.; Schuler, G.; Adams, V.; Lurz, P. Abstract 17607: MicroRNA Expression Profiles in Endomyocardial Biopsies From Patients With Myocarditis - Association With Left Ventricular Function and Clinical Events. *Circulation* **2015**, *132*, A17607-A17607, doi:doi:10.1161/circ.132.suppl\_3.17607.
46. Satoh, M.; Minami, Y.; Takahashi, Y.; Tabuchi, T.; Nakamura, M. Expression of microRNA-208 is associated with adverse clinical outcomes in human dilated cardiomyopathy. *J Card Fail* **2010**, *16*, 404-410, doi:10.1016/j.cardfail.2010.01.002.
47. Marketou, M.; Kontaraki, J.; Konstantinou, J.; Parthenakis, F.; Nakou, H.; Lempidakis, D.; Vernardos, M.; Fragkiadakis, K.; Loulakakis, M.; Theodosaki, O.; et al. P2579Differential microRNA gene expression levels in patients with acute myocarditis. *European Heart Journal* **2017**, *38*, ehx502.P2579, doi:10.1093/eurheartj/ehx502.P2579.
48. Marketou, M.; Kontaraki, J.; Konstantinou, J.; Parthenakis, F.; Patrianakos, A.; Nakou, H.; Lempidakis, D.; Vernardos, M.; Fragkiadakis, K.; Loulakakis, M.; et al. P2573MicroRNA-21 gene expression levels in peripheral monocytes reflect myocardial damage in acute myocarditis. *European Heart Journal* **2017**, *38*, ehx502.P2573, doi:10.1093/eurheartj/ehx502.P2573.
49. Marketou, M.; Kontaraki, J.; Konstantinou, J.; Maragkoudakis, S.; Plevritaki, A.; Lempidakis, D.; Vougia, D.; Fragiadakis, K.; Kassotakis, S.; Theodosaki, O.; et al. P5562Increased microRNA-21 gene expression levels as a biomarker of myocardial damage in acute myocarditis. *European Heart Journal* **2019**, *40*, ehz746.0506, doi:10.1093/eurheartj/ehz746.0506.
50. Marketou, M.; Kontaraki, J.; Fragiadakis, K.; Konstantinou, J.; Maragkoudakis, S.; Lempidakis, D.; Plevritaki, A.; Plataki, M.; Papadaki, S.; Vougia, D.; et al. MicroRNA-208b gene expression levels as a biomarkers of left ventricular dysfunction in patients with acute myocarditis. *European Heart Journal* **2020**, *41*, doi:10.1093/ehjci/ehaa946.2056.
51. Kuehl, U.; Lassner, D.; Gast, M.; Stroux, A.; Rohde, M.; Siegismund, C.; Wang, X.; Escher, F.; Gross, M.; Skurk, C.; et al. Differential Cardiac MicroRNA Expression Predicts the Clinical Course in Human Enterovirus Cardiomyopathy. *Circ Heart Fail* **2015**, *8*, 605-618, doi:10.1161/circheartfailure.114.001475.
52. Heggermont, W.A.; Delrue, L.; Dierckx, R.; Dierickx, K.; Verstreken; Goethals, M.; Bartunek, J.; Vanderheyden, M. The MiR-221/-222 cluster is elevated both in biopsies of patients with myocarditis and idiopathic non-ischemic cardiomyopathy but fails to discriminate between both pathologies. *European Journal of Heart Failure* **2018**, *28*, 23.
53. The 4th Joint EFLM-UEMS Congress “Laboratory Medicine at the Clinical Interface” Warsaw, Poland, 21th–24th September, 2016. *Clinical Chemistry and Laboratory Medicine (CCLM)* **2016**, *54*, eA213-eA366, doi:doi:10.1515/cclm-2016-0657.
54. Zaseeva, A.V.; Zhironov, I.V.; Tereschenko, S.N.; Scvortcov, A.A.; Masenko, V.P.; Kochetov, A.G.; Gimadiev, R.R.; Abramov; Lyang, O.V. The role of circulating miR-21, miR-34a, miR-423, miR-208a and miR-499a in ischemic and dilated cardiomyopathy. *European Journal of Heart Failure* **2016**, *18*, 492.
55. Akat, K.M.; Mihailovic, A.; Williams, Z.; Brown, M.; Morozov, P.; Takayama, H.; Drosatos, K.; Tuschl, T.; Schulze, P.C. Abstract 10918: High-Throughput Sequencing Analysis of microRNA Profile Dynamics in Patients with Advanced Heart Failure Undergoing Ventricular Assist Device Placement in Comparison to Normal Adult and Fetal Cardiac Expression. *Circulation* **2011**, *124*, A10918-A10918, doi:10.1161/circ.124.suppl\_21.A10918.
