# Supplementary material for: A Systematic Review of miRNA and cfDNA as Potential Biomarkers for Liquid Biopsy in Myocarditis and Inflammatory Dilated Cardiomyopathy
Source: MDPI journal article supplement (doi:10.3390/biom12101476), 2022-10-13
Supplement: s1 [file Table S4.xlsx]

## Sheet: Arkusz1
miR-106a	Expression of this gene decreases during DCM, although probably more so in idiopathic than in ischemic. We do not have evidence that it could be assoiciated with inflammation. Other studies did not report it.
miR-125b	Heterogeneous results, probably associated with myocardial damage rather than myocarditis.
miR-133a/b	Could be correlated with MCI / DCM, but reported only in biopsy specimens (not in blood).
miR-181b	Probably a marker of heart failure rather than inflammation.
miR-192	Only one study showed overexpression in MCI / DCM.
miR-197	Only one study showed overexpression in MCI / DCM.
miR-29b	Associated with pathological remodelling rather than inflammation.
miR-320a	Two studies reported its overexpression in MCI / DCM, one reported no significant changes. All three studies utilised blood based samples (exosomes, plasma). The changes of this miRNA lelels were not measured in biopsy specimes.
miR-4763	Heterogeneous results across different studies.
mmu-miR-379	Assessed in only one study, results could not be compared.
mmu-miR-93	Assessed in only one study, results could not be compared.
let-7f	Heterogeneous results, probably associated with myocardial damage rather than myocarditis.
miR-1	Heterogeneous results, probably associated with myocardial damage rather than myocarditis.
miR-142	Heterogeneous results across different studies.
miR-143	Heterogeneous results across different studies.
miR-223	Heterogeneous results across different studies.
miR-27b	Only one study reported its overexpression.
